# Supplementary material for: mir-124-5p Regulates Phagocytosis of Human Macrophages by Targeting the Actin Cytoskeleton via the ARP2/3 Complex
Source: Front Immunol. 2019 Oct 4;10:2210. doi: 10.3389/fimmu.2019.02210 (PMC6787173; doi:10.3389/fimmu.2019.02210)
Supplement: Supplementary file 3 [file Data_Sheet_2.xlsx]

## Sheet: predicted targets (3'UTR)
miRNA	MIMATid	Gene	EntrezID	RefseqID	miRWalk	Microt4	miRanda	mirbridge	miRDB	miRMap	miRNAMap	Pictar2	PITA	RNA22	RNAhybrid	Targetscan	SUM
hsa-miR-124-5p	MIMAT0004591	A1BG	1	XM_005258393	0	0	0	0	0	0	0	0	0	0	1	0	1
hsa-miR-124-5p	MIMAT0004591	A1BG	1	NM_130786	0	0	0	0	0	0	0	0	0	0	1	0	1
hsa-miR-124-5p	MIMAT0004591	A1CF	29974	NM_001198819	0	0	0	0	0	0	0	0	0	0	1	1	2
hsa-miR-124-5p	MIMAT0004591	A1CF	29974	XM_005269720	0	0	0	0	0	0	0	0	0	0	1	1	2
hsa-miR-124-5p	MIMAT0004591	A1CF	29974	NM_014576	0	0	0	0	0	0	0	0	0	0	1	1	2
hsa-miR-124-5p	MIMAT0004591	A1CF	29974	NM_138932	0	0	0	0	0	0	0	0	0	0	1	1	2
hsa-miR-124-5p	MIMAT0004591	A1CF	29974	XM_005269719	0	0	0	0	0	0	0	0	0	0	1	1	2
hsa-miR-124-5p	MIMAT0004591	A1CF	29974	XM_005269718	0	0	0	0	0	0	0	0	0	0	1	1	2
hsa-miR-124-5p	MIMAT0004591	A1CF	29974	NM_001198818	0	0	0	0	0	0	0	0	0	0	1	1	2
hsa-miR-124-5p	MIMAT0004591	A1CF	29974	NM_138933	0	0	0	0	0	0	0	0	0	0	1	1	2
hsa-miR-124-5p	MIMAT0004591	A1CF	29974	NM_001198820	0	0	0	0	0	0	0	0	0	0	1	1	2
hsa-miR-124-5p	MIMAT0004591	A2M	2	NM_000014	0	0	0	0	0	0	0	0	0	1	0	0	1
hsa-miR-124-5p	MIMAT0004591	A2ML1	144568	NM_144670	0	0	0	0	0	0	0	0	0	0	1	0	1
hsa-miR-124-5p	MIMAT0004591	A4GALT	53947	XM_005261644	0	0	0	0	0	0	0	0	0	0	1	0	1
hsa-miR-124-5p	MIMAT0004591	A4GALT	53947	XM_005261646	0	0	0	0	0	0	0	0	0	0	1	0	1
hsa-miR-124-5p	MIMAT0004591	A4GALT	53947	XM_005261647	0	0	0	0	0	0	0	0	0	0	1	0	1
hsa-miR-124-5p	MIMAT0004591	A4GALT	53947	XM_005261648	0	0	0	0	0	0	0	0	0	0	1	0	1
hsa-miR-124-5p	MIMAT0004591	A4GALT	53947	NM_017436	0	0	0	0	0	0	0	0	0	0	1	0	1
hsa-miR-124-5p	MIMAT0004591	A4GALT	53947	XM_005261643	0	0	0	0	0	0	0	0	0	0	1	0	1
hsa-miR-124-5p	MIMAT0004591	A4GALT	53947	XM_005261645	0	0	0	0	0	0	0	0	0	0	1	0	1
hsa-miR-124-5p	MIMAT0004591	A4GNT	51146	NM_016161	0	0	0	0	0	0	0	0	0	0	1	0	1
hsa-miR-124-5p	MIMAT0004591	AACS	65985	NM_023928	0	0	0	0	0	0	0	0	0	0	1	0	1
hsa-miR-124-5p	MIMAT0004591	AACS	65985	XM_005253611	0	0	0	0	0	0	0	0	0	0	1	0	1
hsa-miR-124-5p	MIMAT0004591	AACS	65985	XM_005253610	0	0	0	0	0	0	0	0	0	0	1	0	1
hsa-miR-124-5p	MIMAT0004591	AACS	65985	XM_005253609	0	0	0	0	0	0	0	0	0	0	1	0	1
hsa-miR-124-5p	MIMAT0004591	AADACL3	126767	NM_001103170	1	0	0	0	0	0	0	0	0	0	1	0	2
hsa-miR-124-5p	MIMAT0004591	AADACL3	126767	NM_001103169	1	0	0	0	0	0	0	0	0	0	1	0	2
hsa-miR-124-5p	MIMAT0004591	AADACL4	343066	NM_001013630	0	0	0	0	0	0	0	0	0	0	1	0	1
hsa-miR-124-5p	MIMAT0004591	AADAT	51166	XM_005263045	0	0	1	0	0	1	0	0	0	0	1	1	4
hsa-miR-124-5p	MIMAT0004591	AADAT	51166	NM_182662	0	0	1	0	0	1	0	0	0	0	1	1	4
hsa-miR-124-5p	MIMAT0004591	AADAT	51166	XM_005263044	0	0	1	0	0	1	0	0	0	0	1	1	4
hsa-miR-124-5p	MIMAT0004591	AADAT	51166	NM_016228	0	0	1	0	0	1	0	0	0	0	1	1	4
hsa-miR-124-5p	MIMAT0004591	AAED1	195827	XM_005251783	0	0	0	0	0	0	0	0	0	0	1	0	1
hsa-miR-124-5p	MIMAT0004591	AAED1	195827	NM_153698	0	0	0	0	0	0	0	0	0	0	1	0	1
hsa-miR-124-5p	MIMAT0004591	AAED1	195827	XM_005251784	0	0	0	0	0	0	0	0	0	0	1	0	1
hsa-miR-124-5p	MIMAT0004591	AAGAB	79719	NM_001271886	0	0	0	0	0	1	0	0	0	0	1	0	2
hsa-miR-124-5p	MIMAT0004591	AAGAB	79719	NM_001271885	0	0	0	0	0	1	0	0	0	0	1	0	2
hsa-miR-124-5p	MIMAT0004591	AAGAB	79719	NM_024666	0	0	0	0	0	1	0	0	0	0	1	0	2
hsa-miR-124-5p	MIMAT0004591	AAGAB	79719	XM_005254664	0	0	0	0	0	1	0	0	0	0	0	0	1
hsa-miR-124-5p	MIMAT0004591	AAK1	22848	NM_014911	1	0	1	0	1	0	0	0	0	0	1	1	5
hsa-miR-124-5p	MIMAT0004591	AAK1	22848	XM_005264213	0	0	0	0	0	0	0	0	0	0	1	0	1
hsa-miR-124-5p	MIMAT0004591	AAK1	22848	XM_005264212	0	0	0	0	0	0	0	0	0	0	1	0	1
hsa-miR-124-5p	MIMAT0004591	AAK1	22848	XM_005264211	0	0	0	0	0	0	0	0	0	0	1	0	1
hsa-miR-124-5p	MIMAT0004591	AAK1	22848	XM_005264210	0	0	0	0	0	0	0	0	0	0	1	0	1
hsa-miR-124-5p	MIMAT0004591	AAK1	22848	XM_005264209	0	0	0	0	0	0	0	0	0	0	1	0	1
hsa-miR-124-5p	MIMAT0004591	AAK1	22848	XM_005264208	0	0	0	0	0	0	0	0	0	0	1	0	1
hsa-miR-124-5p	MIMAT0004591	AAK1	22848	XM_005264206	0	0	0	0	0	0	0	0	0	0	1	0	1
hsa-miR-124-5p	MIMAT0004591	AAK1	22848	XM_005264207	0	0	0	0	0	0	0	0	0	0	1	0	1
hsa-miR-124-5p	MIMAT0004591	AAMP	14	NM_001087	0	0	0	0	0	0	0	0	0	0	1	0	1
hsa-miR-124-5p	MIMAT0004591	AAMP	14	XM_005246325	0	0	0	0	0	0	0	0	0	0	1	0	1
hsa-miR-124-5p	MIMAT0004591	AANAT	15	NM_001166579	0	0	0	0	0	0	0	0	0	0	1	0	1
hsa-miR-124-5p	MIMAT0004591	AANAT	15	NM_001088	0	0	0	0	0	0	0	0	0	0	1	0	1
hsa-miR-124-5p	MIMAT0004591	AAR2	25980	NM_015511	0	0	0	0	0	0	0	0	0	0	1	0	1
hsa-miR-124-5p	MIMAT0004591	AAR2	25980	NM_001271874	0	0	0	0	0	0	0	0	0	0	1	0	1
hsa-miR-124-5p	MIMAT0004591	AAR2	25980	XM_005260386	0	0	0	0	0	0	0	0	0	0	1	0	1
hsa-miR-124-5p	MIMAT0004591	AAR2	25980	XM_005260385	0	0	0	0	0	0	0	0	0	0	1	0	1
hsa-miR-124-5p	MIMAT0004591	AARD	441376	NM_001025357	0	0	1	0	1	0	0	0	0	0	1	1	4
hsa-miR-124-5p	MIMAT0004591	AARS	16	XM_005255813	0	0	0	0	0	1	0	0	0	0	1	1	3
hsa-miR-124-5p	MIMAT0004591	AARS	16	NM_001605	0	0	0	0	0	1	0	0	0	0	1	1	3
hsa-miR-124-5p	MIMAT0004591	AARS2	57505	NM_020745	0	0	0	0	0	0	0	0	0	0	1	0	1
hsa-miR-124-5p	MIMAT0004591	AARS2	57505	XM_005249245	0	0	0	0	0	0	0	0	0	0	1	0	1
hsa-miR-124-5p	MIMAT0004591	AARSD1	80755	NM_001261434	0	0	0	0	0	0	0	0	0	0	1	0	1
hsa-miR-124-5p	MIMAT0004591	AASDH	132949	XM_005265725	0	0	0	0	0	0	0	0	0	0	1	0	1
hsa-miR-124-5p	MIMAT0004591	AASDH	132949	XM_005265726	0	0	0	0	0	0	0	0	0	0	1	0	1
hsa-miR-124-5p	MIMAT0004591	AASDH	132949	XM_005265724	0	0	0	0	0	0	0	0	0	0	1	0	1
hsa-miR-124-5p	MIMAT0004591	AASDHPPT	60496	NM_015423	1	0	0	0	0	0	0	0	0	0	1	0	2
hsa-miR-124-5p	MIMAT0004591	AASS	10157	XM_005250105	0	0	0	0	0	0	0	0	0	0	1	0	1
hsa-miR-124-5p	MIMAT0004591	AASS	10157	NM_005763	0	0	0	0	0	0	0	0	0	0	1	0	1
hsa-miR-124-5p	MIMAT0004591	AATF	26574	NM_012138	0	0	0	0	0	0	0	0	0	0	1	0	1
hsa-miR-124-5p	MIMAT0004591	AATK	9625	XM_005257849	0	0	0	0	0	0	0	0	0	1	1	0	2
hsa-miR-124-5p	MIMAT0004591	AATK	9625	XM_005257855	0	0	0	0	0	0	0	0	0	0	1	0	1
hsa-miR-124-5p	MIMAT0004591	AATK	9625	NM_004920	0	0	0	0	0	0	0	0	0	0	1	0	1
hsa-miR-124-5p	MIMAT0004591	AATK	9625	NM_001080395	0	0	0	0	0	0	0	0	0	0	1	0	1
hsa-miR-124-5p	MIMAT0004591	AATK	9625	XM_005257857	0	0	0	0	0	0	0	0	0	0	1	0	1
hsa-miR-124-5p	MIMAT0004591	AATK	9625	XM_005257856	0	0	0	0	0	0	0	0	0	0	1	0	1
hsa-miR-124-5p	MIMAT0004591	AATK	9625	XM_005257851	0	0	0	0	0	0	0	0	0	0	1	0	1
hsa-miR-124-5p	MIMAT0004591	AATK	9625	XM_005257848	0	0	0	0	0	0	0	0	0	0	1	0	1
hsa-miR-124-5p	MIMAT0004591	AATK	9625	XM_005257854	0	0	0	0	0	0	0	0	0	0	1	0	1
hsa-miR-124-5p	MIMAT0004591	AATK	9625	XM_005257850	0	0	0	0	0	0	0	0	0	0	1	0	1
hsa-miR-124-5p	MIMAT0004591	AATK	9625	XM_005257852	0	0	0	0	0	0	0	0	0	0	1	0	1
hsa-miR-124-5p	MIMAT0004591	AATK	9625	XM_005257847	0	0	0	0	0	0	0	0	0	0	1	0	1
hsa-miR-124-5p	MIMAT0004591	AATK	9625	XM_005257853	0	0	0	0	0	0	0	0	0	0	1	0	1
hsa-miR-124-5p	MIMAT0004591	ABAT	18	NM_000663	0	0	0	0	0	0	0	0	0	1	1	0	2
hsa-miR-124-5p	MIMAT0004591	ABAT	18	XM_005255154	0	0	0	0	0	0	0	0	0	0	1	0	1
hsa-miR-124-5p	MIMAT0004591	ABAT	18	NM_020686	0	0	0	0	0	0	0	0	0	0	1	0	1
hsa-miR-124-5p	MIMAT0004591	ABAT	18	NM_001127448	0	0	0	0	0	0	0	0	0	0	1	0	1
hsa-miR-124-5p	MIMAT0004591	ABCA1	19	NM_005502	1	0	0	0	0	0	0	0	0	1	1	0	3
hsa-miR-124-5p	MIMAT0004591	ABCA1	19	XM_005251779	1	0	0	0	0	0	0	0	0	0	1	0	2
hsa-miR-124-5p	MIMAT0004591	ABCA1	19	XM_005251775	1	0	0	0	0	0	0	0	0	0	1	0	2
hsa-miR-124-5p	MIMAT0004591	ABCA1	19	XM_005251774	1	0	0	0	0	0	0	0	0	0	1	0	2
hsa-miR-124-5p	MIMAT0004591	ABCA1	19	XM_005251776	1	0	0	0	0	0	0	0	0	0	1	0	2
hsa-miR-124-5p	MIMAT0004591	ABCA1	19	XM_005251773	1	0	0	0	0	0	0	0	0	0	1	0	2
hsa-miR-124-5p	MIMAT0004591	ABCA1	19	XM_005251780	0	0	0	0	0	0	0	0	0	0	1	0	1
hsa-miR-124-5p	MIMAT0004591	ABCA10	10349	NM_080282	0	0	0	0	0	0	0	0	0	1	1	0	2
hsa-miR-124-5p	MIMAT0004591	ABCA10	10349	XM_005256933	0	0	0	0	0	0	0	0	0	0	1	0	1
hsa-miR-124-5p	MIMAT0004591	ABCA12	26154	NM_173076	1	0	0	0	0	0	0	0	0	1	1	0	3
hsa-miR-124-5p	MIMAT0004591	ABCA12	26154	NM_015657	1	0	0	0	0	0	0	0	0	0	1	0	2
hsa-miR-124-5p	MIMAT0004591	ABCA13	154664	NM_152701	0	1	0	0	0	1	0	0	0	1	1	1	5
hsa-miR-124-5p	MIMAT0004591	ABCA13	154664	XM_005249625	1	0	0	0	0	1	0	0	0	0	1	0	3
hsa-miR-124-5p	MIMAT0004591	ABCA13	154664	XM_005249624	0	0	0	0	0	1	0	0	0	0	1	1	3
hsa-miR-124-5p	MIMAT0004591	ABCA13	154664	XM_005249623	0	0	0	0	0	1	0	0	0	0	1	1	3
hsa-miR-124-5p	MIMAT0004591	ABCA2	20	NM_001606	0	0	0	0	0	0	0	0	0	1	1	0	2
hsa-miR-124-5p	MIMAT0004591	ABCA2	20	NM_212533	0	0	0	0	0	0	0	0	0	0	1	0	1
hsa-miR-124-5p	MIMAT0004591	ABCA3	21	NM_001089	0	0	0	0	0	0	0	0	0	1	1	0	2
hsa-miR-124-5p	MIMAT0004591	ABCA3	21	XM_005255169	0	0	0	0	0	0	0	0	0	0	1	0	1
hsa-miR-124-5p	MIMAT0004591	ABCA3	21	XM_005255168	0	0	0	0	0	0	0	0	0	0	1	0	1
hsa-miR-124-5p	MIMAT0004591	ABCA4	24	NM_000350	0	1	0	0	0	1	0	0	0	0	1	0	3
hsa-miR-124-5p	MIMAT0004591	ABCA5	23461	NM_018672	0	0	0	0	0	0	0	0	0	1	1	0	2
hsa-miR-124-5p	MIMAT0004591	ABCA5	23461	XM_005257177	0	0	0	0	0	0	0	0	0	0	1	0	1
hsa-miR-124-5p	MIMAT0004591	ABCA5	23461	NM_172232	0	0	0	0	0	0	0	0	0	0	1	0	1
hsa-miR-124-5p	MIMAT0004591	ABCA6	23460	NM_080284	0	0	0	0	0	1	0	0	0	0	1	0	2
hsa-miR-124-5p	MIMAT0004591	ABCA7	10347	NM_019112	0	0	0	0	0	0	0	0	0	0	1	0	1
hsa-miR-124-5p	MIMAT0004591	ABCA8	10351	XM_005256939	0	0	0	0	0	0	0	0	0	0	1	0	1
hsa-miR-124-5p	MIMAT0004591	ABCA8	10351	XM_005256941	0	0	0	0	0	0	0	0	0	0	1	0	1
hsa-miR-124-5p	MIMAT0004591	ABCA8	10351	NM_007168	0	0	0	0	0	0	0	0	0	0	1	0	1
hsa-miR-124-5p	MIMAT0004591	ABCA8	10351	XM_005256940	0	0	0	0	0	0	0	0	0	0	1	0	1
hsa-miR-124-5p	MIMAT0004591	ABCA8	10351	XM_005256938	0	0	0	0	0	0	0	0	0	0	1	0	1
hsa-miR-124-5p	MIMAT0004591	ABCA9	10350	XM_005256935	0	0	1	0	0	1	0	0	0	1	1	1	5
hsa-miR-124-5p	MIMAT0004591	ABCA9	10350	NM_080283	0	0	1	0	1	1	0	0	0	0	1	1	5
hsa-miR-124-5p	MIMAT0004591	ABCA9	10350	XM_005256936	0	0	1	0	0	1	0	0	0	0	1	1	4
hsa-miR-124-5p	MIMAT0004591	ABCA9	10350	XM_005256934	0	0	1	0	0	1	0	0	0	0	1	1	4
hsa-miR-124-5p	MIMAT0004591	ABCA9	10350	XM_005256937	0	0	0	0	0	1	0	0	0	0	1	0	2
hsa-miR-124-5p	MIMAT0004591	ABCB1	5243	NM_000927	0	0	0	0	0	0	0	0	0	1	0	0	1
hsa-miR-124-5p	MIMAT0004591	ABCB10	23456	NM_012089	0	0	0	0	0	0	0	0	0	1	1	0	2
hsa-miR-124-5p	MIMAT0004591	ABCB11	8647	NM_003742	0	0	0	0	0	0	0	0	0	0	1	0	1
hsa-miR-124-5p	MIMAT0004591	ABCB11	8647	XM_005246930	0	0	0	0	0	0	0	0	0	0	1	0	1
hsa-miR-124-5p	MIMAT0004591	ABCB5	340273	NM_001163941	0	0	0	0	0	0	0	0	0	1	1	0	2
hsa-miR-124-5p	MIMAT0004591	ABCB5	340273	NM_001163993	0	0	0	0	0	0	0	0	0	0	1	0	1
hsa-miR-124-5p	MIMAT0004591	ABCB5	340273	NM_001163942	0	0	0	0	0	0	0	0	0	0	1	0	1
hsa-miR-124-5p	MIMAT0004591	ABCB5	340273	XM_005249737	0	0	0	0	0	0	0	0	0	0	1	0	1
hsa-miR-124-5p	MIMAT0004591	ABCB5	340273	NM_178559	0	0	0	0	0	0	0	0	0	0	1	0	1
hsa-miR-124-5p	MIMAT0004591	ABCB6	10058	NM_005689	0	0	0	0	0	0	0	0	0	0	1	0	1
hsa-miR-124-5p	MIMAT0004591	ABCB6	10058	XM_005246215	0	0	0	0	0	0	0	0	0	0	1	0	1
hsa-miR-124-5p	MIMAT0004591	ABCB8	11194	NM_007188	1	0	1	0	0	1	0	0	0	1	1	1	6
hsa-miR-124-5p	MIMAT0004591	ABCB8	11194	XM_005249937	1	0	1	0	0	1	0	0	0	0	1	1	5
hsa-miR-124-5p	MIMAT0004591	ABCB8	11194	XM_005249940	1	0	1	0	0	1	0	0	0	0	1	1	5
hsa-miR-124-5p	MIMAT0004591	ABCB8	11194	XM_005249938	1	0	1	0	0	1	0	0	0	0	1	1	5
hsa-miR-124-5p	MIMAT0004591	ABCB9	23457	NM_019625	1	1	0	0	0	0	0	0	0	0	1	0	3
hsa-miR-124-5p	MIMAT0004591	ABCB9	23457	XM_005253559	1	0	0	0	0	0	0	0	0	0	1	0	2
hsa-miR-124-5p	MIMAT0004591	ABCB9	23457	XM_005253558	1	0	0	0	0	0	0	0	0	0	1	0	2
hsa-miR-124-5p	MIMAT0004591	ABCB9	23457	NM_001243013	1	0	0	0	0	0	0	0	0	0	1	0	2
hsa-miR-124-5p	MIMAT0004591	ABCB9	23457	NM_019624	1	0	0	0	0	0	0	0	0	0	1	0	2
hsa-miR-124-5p	MIMAT0004591	ABCB9	23457	NM_203444	0	0	0	0	0	0	0	0	0	0	1	0	1
hsa-miR-124-5p	MIMAT0004591	ABCC1	4363	NM_004996	1	0	0	0	0	1	0	0	0	1	1	0	4
hsa-miR-124-5p	MIMAT0004591	ABCC1	4363	XM_005255329	1	0	0	0	0	1	0	0	0	0	1	0	3
hsa-miR-124-5p	MIMAT0004591	ABCC1	4363	XM_005255328	1	0	0	0	0	1	0	0	0	0	1	0	3
hsa-miR-124-5p	MIMAT0004591	ABCC1	4363	XM_005255327	1	0	0	0	0	1	0	0	0	0	1	0	3
hsa-miR-124-5p	MIMAT0004591	ABCC1	4363	XM_005255326	1	0	0	0	0	1	0	0	0	0	1	0	3
hsa-miR-124-5p	MIMAT0004591	ABCC10	89845	NM_033450	0	0	0	0	0	0	0	0	0	0	1	0	1
hsa-miR-124-5p	MIMAT0004591	ABCC10	89845	XM_005249470	0	0	0	0	0	0	0	0	0	0	1	0	1
hsa-miR-124-5p	MIMAT0004591	ABCC10	89845	XM_005249469	0	0	0	0	0	0	0	0	0	0	1	0	1
hsa-miR-124-5p	MIMAT0004591	ABCC10	89845	XM_005249465	0	0	0	0	0	0	0	0	0	0	1	0	1
hsa-miR-124-5p	MIMAT0004591	ABCC10	89845	NM_001198934	0	0	0	0	0	0	0	0	0	0	1	0	1
hsa-miR-124-5p	MIMAT0004591	ABCC12	94160	NM_033226	0	0	0	0	0	1	0	0	0	1	1	0	3
hsa-miR-124-5p	MIMAT0004591	ABCC2	1244	NM_000392	0	0	1	0	0	1	0	0	0	1	1	1	5
hsa-miR-124-5p	MIMAT0004591	ABCC2	1244	XM_005269536	0	0	1	0	0	1	0	0	0	0	1	1	4
hsa-miR-124-5p	MIMAT0004591	ABCC3	8714	NM_003786	0	0	0	0	0	1	0	0	0	1	1	0	3
hsa-miR-124-5p	MIMAT0004591	ABCC3	8714	NM_001144070	0	0	0	0	0	1	0	0	0	0	1	0	2
hsa-miR-124-5p	MIMAT0004591	ABCC3	8714	XM_005257763	0	0	0	0	0	1	0	0	0	0	1	0	2
hsa-miR-124-5p	MIMAT0004591	ABCC4	10257	NM_005845	0	0	0	0	0	1	0	0	0	1	1	0	3
hsa-miR-124-5p	MIMAT0004591	ABCC4	10257	XM_005254028	0	0	0	0	0	1	0	0	0	0	1	0	2
hsa-miR-124-5p	MIMAT0004591	ABCC4	10257	NM_001105515	0	0	0	0	0	1	0	0	0	0	1	0	2
hsa-miR-124-5p	MIMAT0004591	ABCC4	10257	XM_005254027	0	0	0	0	0	1	0	0	0	0	1	0	2
hsa-miR-124-5p	MIMAT0004591	ABCC4	10257	XM_005254026	0	0	0	0	0	1	0	0	0	0	1	0	2
hsa-miR-124-5p	MIMAT0004591	ABCC4	10257	XM_005254025	0	0	0	0	0	1	0	0	0	0	1	0	2
hsa-miR-124-5p	MIMAT0004591	ABCC5	10057	XM_005247059	0	1	1	0	0	1	0	0	0	0	1	1	5
hsa-miR-124-5p	MIMAT0004591	ABCC5	10057	XM_005247060	0	0	1	0	0	1	0	0	0	0	1	1	4
hsa-miR-124-5p	MIMAT0004591	ABCC5	10057	NM_005688	0	0	1	0	0	1	0	0	0	0	1	1	4
hsa-miR-124-5p	MIMAT0004591	ABCC5	10057	XM_005247062	0	0	1	0	0	1	0	0	0	0	1	1	4
hsa-miR-124-5p	MIMAT0004591	ABCC5	10057	XM_005247058	0	0	1	0	0	1	0	0	0	0	1	1	4
hsa-miR-124-5p	MIMAT0004591	ABCC5	10057	NM_001023587	0	0	0	0	0	1	0	0	0	0	1	0	2
hsa-miR-124-5p	MIMAT0004591	ABCC5	10057	XM_005247061	0	0	0	0	0	1	0	0	0	0	1	0	2
hsa-miR-124-5p	MIMAT0004591	ABCC6	368	NM_001079528	1	0	0	0	0	1	0	0	0	0	1	0	3
hsa-miR-124-5p	MIMAT0004591	ABCC6	368	NM_001171	0	0	0	0	0	1	0	0	0	0	1	0	2
hsa-miR-124-5p	MIMAT0004591	ABCC6	368	XM_005255311	0	0	0	0	0	1	0	0	0	0	0	0	1
hsa-miR-124-5p	MIMAT0004591	ABCC6	368	XM_005255310	0	0	0	0	0	1	0	0	0	0	0	0	1
hsa-miR-124-5p	MIMAT0004591	ABCC8	6833	NM_000352	0	0	0	0	0	0	0	0	0	1	0	0	1
hsa-miR-124-5p	MIMAT0004591	ABCC9	10060	XM_005253286	0	0	0	0	0	1	0	0	0	1	1	0	3
hsa-miR-124-5p	MIMAT0004591	ABCC9	10060	XM_005253287	0	0	0	0	0	1	0	0	0	0	1	0	2
hsa-miR-124-5p	MIMAT0004591	ABCC9	10060	NM_020297	0	0	0	0	0	1	0	0	0	0	1	0	2
hsa-miR-124-5p	MIMAT0004591	ABCC9	10060	XM_005253285	0	0	0	0	0	1	0	0	0	0	1	0	2
hsa-miR-124-5p	MIMAT0004591	ABCC9	10060	XM_005253290	0	0	0	0	0	1	0	0	0	0	1	0	2
hsa-miR-124-5p	MIMAT0004591	ABCC9	10060	XM_005253288	0	0	0	0	0	1	0	0	0	0	1	0	2
hsa-miR-124-5p	MIMAT0004591	ABCC9	10060	XM_005253289	0	0	0	0	0	1	0	0	0	0	1	0	2
hsa-miR-124-5p	MIMAT0004591	ABCC9	10060	XM_005253284	0	0	0	0	0	1	0	0	0	0	1	0	2
hsa-miR-124-5p	MIMAT0004591	ABCC9	10060	XM_005253291	0	0	0	0	0	1	0	0	0	0	0	0	1
hsa-miR-124-5p	MIMAT0004591	ABCC9	10060	NM_005691	0	0	0	0	0	1	0	0	0	0	0	0	1
hsa-miR-124-5p	MIMAT0004591	ABCD1	215	NM_000033	0	0	0	0	0	1	0	0	0	0	1	0	2
hsa-miR-124-5p	MIMAT0004591	ABCD2	225	NM_005164	0	0	0	0	0	0	0	0	0	0	1	0	1
hsa-miR-124-5p	MIMAT0004591	ABCD3	5825	XM_005271087	1	0	0	0	0	0	0	0	0	1	1	0	3
hsa-miR-124-5p	MIMAT0004591	ABCD3	5825	XM_005271090	1	0	0	0	0	0	0	0	0	0	1	0	2
hsa-miR-124-5p	MIMAT0004591	ABCD3	5825	XM_005271089	1	0	0	0	0	0	0	0	0	0	1	0	2
hsa-miR-124-5p	MIMAT0004591	ABCD3	5825	XM_005271088	1	0	0	0	0	0	0	0	0	0	1	0	2
hsa-miR-124-5p	MIMAT0004591	ABCD3	5825	NM_002858	1	0	0	0	0	0	0	0	0	0	1	0	2
hsa-miR-124-5p	MIMAT0004591	ABCD4	5826	NM_005050	0	1	0	0	0	0	0	0	0	1	1	0	3
hsa-miR-124-5p	MIMAT0004591	ABCD4	5826	XM_005267954	0	0	0	0	0	0	0	0	0	0	1	0	1
hsa-miR-124-5p	MIMAT0004591	ABCD4	5826	XM_005267953	0	0	0	0	0	0	0	0	0	0	1	0	1
hsa-miR-124-5p	MIMAT0004591	ABCD4	5826	XM_005267942	0	0	0	0	0	0	0	0	0	0	1	0	1
hsa-miR-124-5p	MIMAT0004591	ABCD4	5826	XM_005267946	0	0	0	0	0	0	0	0	0	0	1	0	1
hsa-miR-124-5p	MIMAT0004591	ABCD4	5826	XM_005267952	0	0	0	0	0	0	0	0	0	0	1	0	1
hsa-miR-124-5p	MIMAT0004591	ABCD4	5826	XM_005267951	0	0	0	0	0	0	0	0	0	0	1	0	1
hsa-miR-124-5p	MIMAT0004591	ABCD4	5826	XM_005267941	0	0	0	0	0	0	0	0	0	0	1	0	1
hsa-miR-124-5p	MIMAT0004591	ABCD4	5826	XM_005267940	0	0	0	0	0	0	0	0	0	0	1	0	1
hsa-miR-124-5p	MIMAT0004591	ABCD4	5826	XM_005267950	0	0	0	0	0	0	0	0	0	0	1	0	1
hsa-miR-124-5p	MIMAT0004591	ABCD4	5826	XM_005267949	0	0	0	0	0	0	0	0	0	0	1	0	1
hsa-miR-124-5p	MIMAT0004591	ABCD4	5826	XM_005267948	0	0	0	0	0	0	0	0	0	0	1	0	1
hsa-miR-124-5p	MIMAT0004591	ABCD4	5826	XM_005267939	0	0	0	0	0	0	0	0	0	0	1	0	1
hsa-miR-124-5p	MIMAT0004591	ABCD4	5826	XM_005267947	0	0	0	0	0	0	0	0	0	0	1	0	1
hsa-miR-124-5p	MIMAT0004591	ABCD4	5826	XM_005267944	0	0	0	0	0	0	0	0	0	0	1	0	1
hsa-miR-124-5p	MIMAT0004591	ABCD4	5826	XM_005267937	0	0	0	0	0	0	0	0	0	0	1	0	1
hsa-miR-124-5p	MIMAT0004591	ABCD4	5826	XM_005267935	0	0	0	0	0	0	0	0	0	0	1	0	1
hsa-miR-124-5p	MIMAT0004591	ABCE1	6059	NM_002940	0	0	0	0	0	0	0	0	0	0	1	0	1
hsa-miR-124-5p	MIMAT0004591	ABCE1	6059	NM_001040876	0	0	0	0	0	0	0	0	0	0	1	0	1
hsa-miR-124-5p	MIMAT0004591	ABCF1	23	NM_001025091	0	0	0	0	0	0	0	0	0	0	1	0	1
hsa-miR-124-5p	MIMAT0004591	ABCF1	23	XM_005248954	0	0	0	0	0	0	0	0	0	0	1	0	1
hsa-miR-124-5p	MIMAT0004591	ABCF1	23	NM_001090	0	0	0	0	0	0	0	0	0	0	1	0	1
hsa-miR-124-5p	MIMAT0004591	ABCF2	10061	NM_007189	1	0	0	0	0	0	0	0	0	1	1	0	3
hsa-miR-124-5p	MIMAT0004591	ABCF2	10061	XM_005249931	0	0	0	0	0	0	0	0	0	0	1	0	1
hsa-miR-124-5p	MIMAT0004591	ABCF2	10061	NM_005692	0	0	0	0	0	0	0	0	0	0	1	0	1
hsa-miR-124-5p	MIMAT0004591	ABCF3	55324	NM_018358	0	0	0	0	0	0	0	0	0	0	1	0	1
hsa-miR-124-5p	MIMAT0004591	ABCF3	55324	XM_005247580	0	0	0	0	0	0	0	0	0	0	1	0	1
hsa-miR-124-5p	MIMAT0004591	ABCF3	55324	XM_005247581	0	0	0	0	0	0	0	0	0	0	1	0	1
hsa-miR-124-5p	MIMAT0004591	ABCG1	9619	NM_207629	0	0	0	0	0	0	0	0	0	0	1	0	1
hsa-miR-124-5p	MIMAT0004591	ABCG1	9619	NM_016818	0	0	0	0	0	0	0	0	0	0	1	0	1
hsa-miR-124-5p	MIMAT0004591	ABCG1	9619	NM_207174	0	0	0	0	0	0	0	0	0	0	1	0	1
hsa-miR-124-5p	MIMAT0004591	ABCG1	9619	NM_004915	0	0	0	0	0	0	0	0	0	0	1	0	1
hsa-miR-124-5p	MIMAT0004591	ABCG1	9619	NM_207628	0	0	0	0	0	0	0	0	0	0	1	0	1
hsa-miR-124-5p	MIMAT0004591	ABCG1	9619	NM_207627	0	0	0	0	0	0	0	0	0	0	1	0	1
hsa-miR-124-5p	MIMAT0004591	ABCG1	9619	XM_005261209	0	0	0	0	0	0	0	0	0	0	1	0	1
hsa-miR-124-5p	MIMAT0004591	ABCG2	9429	NM_004827	0	0	1	0	0	1	0	0	0	1	1	1	5
hsa-miR-124-5p	MIMAT0004591	ABCG2	9429	XM_005263356	0	0	1	0	0	1	0	0	0	0	1	1	4
hsa-miR-124-5p	MIMAT0004591	ABCG2	9429	XM_005263354	0	0	1	0	0	1	0	0	0	0	1	1	4
hsa-miR-124-5p	MIMAT0004591	ABCG2	9429	NM_001257386	0	0	1	0	0	1	0	0	0	0	1	1	4
hsa-miR-124-5p	MIMAT0004591	ABCG2	9429	XM_005263355	0	0	1	0	0	1	0	0	0	0	1	1	4
hsa-miR-124-5p	MIMAT0004591	ABCG4	64137	NM_022169	0	0	0	0	0	0	0	0	0	0	1	0	1
hsa-miR-124-5p	MIMAT0004591	ABCG4	64137	NM_001142505	0	0	0	0	0	0	0	0	0	0	1	0	1
hsa-miR-124-5p	MIMAT0004591	ABCG5	64240	NM_022436	0	0	0	0	0	0	0	0	0	1	1	0	2
hsa-miR-124-5p	MIMAT0004591	ABCG5	64240	XM_005264482	0	0	0	0	0	0	0	0	0	0	1	0	1
hsa-miR-124-5p	MIMAT0004591	ABCG8	64241	XM_005264483	0	0	0	0	0	0	0	0	0	0	1	0	1
hsa-miR-124-5p	MIMAT0004591	ABCG8	64241	NM_022437	0	0	0	0	0	0	0	0	0	0	1	0	1
hsa-miR-124-5p	MIMAT0004591	ABHD1	84696	NM_032604	0	0	0	0	0	0	0	0	0	0	1	0	1
hsa-miR-124-5p	MIMAT0004591	ABHD10	55347	NM_001272069	1	0	1	0	0	1	0	0	0	0	1	1	5
hsa-miR-124-5p	MIMAT0004591	ABHD10	55347	NM_018394	0	0	1	0	0	1	0	0	0	0	1	1	4
hsa-miR-124-5p	MIMAT0004591	ABHD11	83451	NM_148912	0	0	0	0	0	0	0	0	0	1	1	0	2
hsa-miR-124-5p	MIMAT0004591	ABHD11	83451	NM_001145364	0	0	0	0	0	0	0	0	0	0	1	0	1
hsa-miR-124-5p	MIMAT0004591	ABHD11	83451	NM_148913	0	0	0	0	0	0	0	0	0	0	1	0	1
hsa-miR-124-5p	MIMAT0004591	ABHD12	26090	NM_001042472	0	0	0	0	0	0	0	0	0	1	1	0	2
hsa-miR-124-5p	MIMAT0004591	ABHD12	26090	XM_005260699	0	0	0	0	0	0	0	0	0	0	1	0	1
hsa-miR-124-5p	MIMAT0004591	ABHD12B	145447	XM_005267357	0	1	0	0	0	0	0	0	0	0	1	0	2
hsa-miR-124-5p	MIMAT0004591	ABHD12B	145447	NM_181814	0	0	0	0	0	0	0	0	0	0	1	0	1
hsa-miR-124-5p	MIMAT0004591	ABHD12B	145447	XM_005267356	0	0	0	0	0	0	0	0	0	0	1	0	1
hsa-miR-124-5p	MIMAT0004591	ABHD12B	145447	NM_001206673	0	0	0	0	0	0	0	0	0	0	1	0	1
hsa-miR-124-5p	MIMAT0004591	ABHD13	84945	NM_032859	0	0	0	0	0	0	0	0	0	0	1	0	1
hsa-miR-124-5p	MIMAT0004591	ABHD14B	84836	NM_032750	0	0	0	0	0	0	0	0	0	0	1	0	1
hsa-miR-124-5p	MIMAT0004591	ABHD14B	84836	XM_005265514	0	0	0	0	0	0	0	0	0	0	1	0	1
hsa-miR-124-5p	MIMAT0004591	ABHD14B	84836	NM_001254753	0	0	0	0	0	0	0	0	0	0	1	0	1
hsa-miR-124-5p	MIMAT0004591	ABHD14B	84836	NM_001146314	0	0	0	0	0	0	0	0	0	0	1	0	1
hsa-miR-124-5p	MIMAT0004591	ABHD15	116236	NM_198147	0	0	0	0	0	0	0	0	0	1	1	0	2
hsa-miR-124-5p	MIMAT0004591	ABHD16A	7920	NM_001177515	0	1	0	0	0	0	0	0	0	0	0	0	1
hsa-miR-124-5p	MIMAT0004591	ABHD17B	51104	NM_001025780	0	0	0	0	0	0	0	0	0	1	1	0	2
hsa-miR-124-5p	MIMAT0004591	ABHD17C	58489	NM_021214	1	0	0	0	0	0	0	0	0	0	1	0	2
hsa-miR-124-5p	MIMAT0004591	ABHD17C	58489	XM_005254574	1	0	0	0	0	0	0	0	0	0	1	0	2
hsa-miR-124-5p	MIMAT0004591	ABHD17C	58489	XM_005254573	1	0	0	0	0	0	0	0	0	0	1	0	2
hsa-miR-124-5p	MIMAT0004591	ABHD2	11057	NM_007011	0	0	0	0	0	0	0	0	0	1	1	0	2
hsa-miR-124-5p	MIMAT0004591	ABHD2	11057	XM_005254833	0	0	0	0	0	0	0	0	0	0	1	0	1
hsa-miR-124-5p	MIMAT0004591	ABHD2	11057	NM_152924	0	0	0	0	0	0	0	0	0	0	1	0	1
hsa-miR-124-5p	MIMAT0004591	ABHD2	11057	XM_005254832	0	0	0	0	0	0	0	0	0	0	1	0	1
hsa-miR-124-5p	MIMAT0004591	ABHD3	171586	NM_138340	0	1	0	0	0	0	0	0	0	0	1	0	2
hsa-miR-124-5p	MIMAT0004591	ABHD3	171586	XM_005258205	0	0	0	0	0	0	0	0	0	0	1	0	1
hsa-miR-124-5p	MIMAT0004591	ABHD4	63874	XM_005267986	0	0	0	0	0	1	0	0	0	0	1	0	2
hsa-miR-124-5p	MIMAT0004591	ABHD4	63874	NM_022060	0	0	0	0	0	1	0	0	0	0	1	0	2
hsa-miR-124-5p	MIMAT0004591	ABHD5	51099	XM_005265197	0	0	1	0	0	0	0	0	0	0	1	1	3
hsa-miR-124-5p	MIMAT0004591	ABHD5	51099	NM_016006	1	0	0	0	0	0	0	0	0	0	1	0	2
hsa-miR-124-5p	MIMAT0004591	ABHD6	57406	XM_005265334	0	0	0	0	0	0	0	0	0	0	1	0	1
hsa-miR-124-5p	MIMAT0004591	ABHD6	57406	XM_005265335	0	0	0	0	0	0	0	0	0	0	1	0	1
hsa-miR-124-5p	MIMAT0004591	ABHD6	57406	NM_020676	0	0	0	0	0	0	0	0	0	0	1	0	1
hsa-miR-124-5p	MIMAT0004591	ABHD6	57406	XM_005265336	0	0	0	0	0	0	0	0	0	0	1	0	1
hsa-miR-124-5p	MIMAT0004591	ABHD8	79575	NM_024527	0	0	0	0	0	0	0	0	0	0	1	0	1
hsa-miR-124-5p	MIMAT0004591	ABI1	10006	NM_005470	0	0	0	0	0	0	0	0	0	0	1	0	1
hsa-miR-124-5p	MIMAT0004591	ABI1	10006	XM_005252334	0	0	0	0	0	0	0	0	0	0	1	0	1
hsa-miR-124-5p	MIMAT0004591	ABI1	10006	XM_005252333	0	0	0	0	0	0	0	0	0	0	1	0	1
hsa-miR-124-5p	MIMAT0004591	ABI1	10006	XM_005252332	0	0	0	0	0	0	0	0	0	0	1	0	1
hsa-miR-124-5p	MIMAT0004591	ABI1	10006	NM_001178125	0	0	0	0	0	0	0	0	0	0	1	0	1
hsa-miR-124-5p	MIMAT0004591	ABI1	10006	XM_005252331	0	0	0	0	0	0	0	0	0	0	1	0	1
hsa-miR-124-5p	MIMAT0004591	ABI1	10006	NM_001178124	0	0	0	0	0	0	0	0	0	0	1	0	1
hsa-miR-124-5p	MIMAT0004591	ABI1	10006	NM_001178123	0	0	0	0	0	0	0	0	0	0	1	0	1
hsa-miR-124-5p	MIMAT0004591	ABI1	10006	NM_001178122	0	0	0	0	0	0	0	0	0	0	1	0	1
hsa-miR-124-5p	MIMAT0004591	ABI1	10006	NM_001178121	0	0	0	0	0	0	0	0	0	0	1	0	1
hsa-miR-124-5p	MIMAT0004591	ABI1	10006	NM_001178120	0	0	0	0	0	0	0	0	0	0	1	0	1
hsa-miR-124-5p	MIMAT0004591	ABI1	10006	NM_001012751	0	0	0	0	0	0	0	0	0	0	1	0	1
hsa-miR-124-5p	MIMAT0004591	ABI1	10006	NM_001012752	0	0	0	0	0	0	0	0	0	0	1	0	1
hsa-miR-124-5p	MIMAT0004591	ABI1	10006	NM_001178119	0	0	0	0	0	0	0	0	0	0	1	0	1
hsa-miR-124-5p	MIMAT0004591	ABI1	10006	NM_001012750	0	0	0	0	0	0	0	0	0	0	1	0	1
hsa-miR-124-5p	MIMAT0004591	ABI1	10006	NM_001178116	0	0	0	0	0	0	0	0	0	0	1	0	1
hsa-miR-124-5p	MIMAT0004591	ABI2	10152	XM_005246217	0	0	0	0	0	0	0	0	0	1	1	0	2
hsa-miR-124-5p	MIMAT0004591	ABI2	10152	XM_005246229	0	0	0	0	0	0	0	0	0	0	1	0	1
hsa-miR-124-5p	MIMAT0004591	ABI2	10152	NM_005759	0	0	0	0	0	0	0	0	0	0	1	0	1
hsa-miR-124-5p	MIMAT0004591	ABI2	10152	XM_005246228	0	0	0	0	0	0	0	0	0	0	1	0	1
hsa-miR-124-5p	MIMAT0004591	ABI2	10152	XM_005246226	0	0	0	0	0	0	0	0	0	0	1	0	1
hsa-miR-124-5p	MIMAT0004591	ABI2	10152	XM_005246225	0	0	0	0	0	0	0	0	0	0	1	0	1
hsa-miR-124-5p	MIMAT0004591	ABI2	10152	XM_005246224	0	0	0	0	0	0	0	0	0	0	1	0	1
hsa-miR-124-5p	MIMAT0004591	ABI2	10152	XM_005246222	0	0	0	0	0	0	0	0	0	0	1	0	1
hsa-miR-124-5p	MIMAT0004591	ABI2	10152	XM_005246221	0	0	0	0	0	0	0	0	0	0	1	0	1
hsa-miR-124-5p	MIMAT0004591	ABI2	10152	XM_005246218	0	0	0	0	0	0	0	0	0	0	1	0	1
hsa-miR-124-5p	MIMAT0004591	ABI2	10152	XM_005246223	0	0	0	0	0	0	0	0	0	0	1	0	1
hsa-miR-124-5p	MIMAT0004591	ABI3BP	25890	XM_005247281	0	0	0	0	0	0	0	0	0	0	1	0	1
hsa-miR-124-5p	MIMAT0004591	ABI3BP	25890	XM_005247319	0	0	0	0	0	0	0	0	0	0	1	0	1
hsa-miR-124-5p	MIMAT0004591	ABI3BP	25890	NM_015429	0	0	0	0	0	0	0	0	0	0	1	0	1
hsa-miR-124-5p	MIMAT0004591	ABI3BP	25890	XM_005247318	0	0	0	0	0	0	0	0	0	0	1	0	1
hsa-miR-124-5p	MIMAT0004591	ABI3BP	25890	XM_005247317	0	0	0	0	0	0	0	0	0	0	1	0	1
hsa-miR-124-5p	MIMAT0004591	ABI3BP	25890	XM_005247316	0	0	0	0	0	0	0	0	0	0	1	0	1
hsa-miR-124-5p	MIMAT0004591	ABI3BP	25890	XM_005247315	0	0	0	0	0	0	0	0	0	0	1	0	1
hsa-miR-124-5p	MIMAT0004591	ABI3BP	25890	XM_005247314	0	0	0	0	0	0	0	0	0	0	1	0	1
hsa-miR-124-5p	MIMAT0004591	ABI3BP	25890	XM_005247313	0	0	0	0	0	0	0	0	0	0	1	0	1
hsa-miR-124-5p	MIMAT0004591	ABI3BP	25890	XM_005247312	0	0	0	0	0	0	0	0	0	0	1	0	1
hsa-miR-124-5p	MIMAT0004591	ABI3BP	25890	XM_005247311	0	0	0	0	0	0	0	0	0	0	1	0	1
hsa-miR-124-5p	MIMAT0004591	ABI3BP	25890	XM_005247310	0	0	0	0	0	0	0	0	0	0	1	0	1
hsa-miR-124-5p	MIMAT0004591	ABI3BP	25890	XM_005247308	0	0	0	0	0	0	0	0	0	0	1	0	1
hsa-miR-124-5p	MIMAT0004591	ABI3BP	25890	XM_005247307	0	0	0	0	0	0	0	0	0	0	1	0	1
hsa-miR-124-5p	MIMAT0004591	ABI3BP	25890	XM_005247306	0	0	0	0	0	0	0	0	0	0	1	0	1
hsa-miR-124-5p	MIMAT0004591	ABI3BP	25890	XM_005247309	0	0	0	0	0	0	0	0	0	0	1	0	1
hsa-miR-124-5p	MIMAT0004591	ABI3BP	25890	XM_005247305	0	0	0	0	0	0	0	0	0	0	1	0	1
hsa-miR-124-5p	MIMAT0004591	ABI3BP	25890	XM_005247304	0	0	0	0	0	0	0	0	0	0	1	0	1
hsa-miR-124-5p	MIMAT0004591	ABI3BP	25890	XM_005247303	0	0	0	0	0	0	0	0	0	0	1	0	1
hsa-miR-124-5p	MIMAT0004591	ABI3BP	25890	XM_005247302	0	0	0	0	0	0	0	0	0	0	1	0	1
hsa-miR-124-5p	MIMAT0004591	ABI3BP	25890	XM_005247301	0	0	0	0	0	0	0	0	0	0	1	0	1
hsa-miR-124-5p	MIMAT0004591	ABI3BP	25890	XM_005247300	0	0	0	0	0	0	0	0	0	0	1	0	1
hsa-miR-124-5p	MIMAT0004591	ABI3BP	25890	XM_005247299	0	0	0	0	0	0	0	0	0	0	1	0	1
hsa-miR-124-5p	MIMAT0004591	ABI3BP	25890	XM_005247297	0	0	0	0	0	0	0	0	0	0	1	0	1
hsa-miR-124-5p	MIMAT0004591	ABI3BP	25890	XM_005247298	0	0	0	0	0	0	0	0	0	0	1	0	1
hsa-miR-124-5p	MIMAT0004591	ABI3BP	25890	XM_005247296	0	0	0	0	0	0	0	0	0	0	1	0	1
hsa-miR-124-5p	MIMAT0004591	ABI3BP	25890	XM_005247295	0	0	0	0	0	0	0	0	0	0	1	0	1
hsa-miR-124-5p	MIMAT0004591	ABI3BP	25890	XM_005247294	0	0	0	0	0	0	0	0	0	0	1	0	1
hsa-miR-124-5p	MIMAT0004591	ABI3BP	25890	XM_005247293	0	0	0	0	0	0	0	0	0	0	1	0	1
hsa-miR-124-5p	MIMAT0004591	ABI3BP	25890	XM_005247286	0	0	0	0	0	0	0	0	0	0	1	0	1
hsa-miR-124-5p	MIMAT0004591	ABI3BP	25890	XM_005247292	0	0	0	0	0	0	0	0	0	0	1	0	1
hsa-miR-124-5p	MIMAT0004591	ABI3BP	25890	XM_005247291	0	0	0	0	0	0	0	0	0	0	1	0	1
hsa-miR-124-5p	MIMAT0004591	ABI3BP	25890	XM_005247289	0	0	0	0	0	0	0	0	0	0	1	0	1
hsa-miR-124-5p	MIMAT0004591	ABI3BP	25890	XM_005247290	0	0	0	0	0	0	0	0	0	0	1	0	1
hsa-miR-124-5p	MIMAT0004591	ABI3BP	25890	XM_005247288	0	0	0	0	0	0	0	0	0	0	1	0	1
hsa-miR-124-5p	MIMAT0004591	ABI3BP	25890	XM_005247287	0	0	0	0	0	0	0	0	0	0	1	0	1
hsa-miR-124-5p	MIMAT0004591	ABI3BP	25890	XM_005247285	0	0	0	0	0	0	0	0	0	0	1	0	1
hsa-miR-124-5p	MIMAT0004591	ABI3BP	25890	XM_005247284	0	0	0	0	0	0	0	0	0	0	1	0	1
hsa-miR-124-5p	MIMAT0004591	ABI3BP	25890	XM_005247283	0	0	0	0	0	0	0	0	0	0	1	0	1
hsa-miR-124-5p	MIMAT0004591	ABI3BP	25890	XM_005247282	0	0	0	0	0	0	0	0	0	0	1	0	1
hsa-miR-124-5p	MIMAT0004591	ABL1	25	XM_005272177	0	0	0	0	0	0	0	0	0	0	1	0	1
hsa-miR-124-5p	MIMAT0004591	ABL1	25	NM_005157	0	0	0	0	0	0	0	0	0	0	1	0	1
hsa-miR-124-5p	MIMAT0004591	ABL1	25	NM_007313	0	0	0	0	0	0	0	0	0	0	1	0	1
hsa-miR-124-5p	MIMAT0004591	ABL2	27	NM_007314	1	0	0	0	0	1	0	0	0	1	1	1	5
hsa-miR-124-5p	MIMAT0004591	ABL2	27	NM_001168239	1	0	0	0	0	1	0	0	0	0	1	1	4
hsa-miR-124-5p	MIMAT0004591	ABL2	27	NM_001136000	1	0	0	0	0	1	0	0	0	0	1	1	4
hsa-miR-124-5p	MIMAT0004591	ABL2	27	XM_005245088	1	0	0	0	0	1	0	0	0	0	1	1	4
hsa-miR-124-5p	MIMAT0004591	ABL2	27	NM_001168238	1	0	0	0	0	1	0	0	0	0	1	1	4
hsa-miR-124-5p	MIMAT0004591	ABL2	27	NM_001168237	1	0	0	0	0	1	0	0	0	0	1	1	4
hsa-miR-124-5p	MIMAT0004591	ABL2	27	NM_005158	1	0	0	0	0	1	0	0	0	0	1	1	4
hsa-miR-124-5p	MIMAT0004591	ABL2	27	NM_001168236	1	0	0	0	0	1	0	0	0	0	1	1	4
hsa-miR-124-5p	MIMAT0004591	ABL2	27	NM_001136001	1	0	0	0	0	1	0	0	0	0	1	0	3
hsa-miR-124-5p	MIMAT0004591	ABLIM1	3983	XM_005269818	0	0	0	0	0	0	0	0	0	1	1	0	2
hsa-miR-124-5p	MIMAT0004591	ABLIM1	3983	XM_005269830	0	0	0	0	0	0	0	0	0	0	1	0	1
hsa-miR-124-5p	MIMAT0004591	ABLIM1	3983	XM_005269829	0	0	0	0	0	0	0	0	0	0	1	0	1
hsa-miR-124-5p	MIMAT0004591	ABLIM1	3983	XM_005269828	0	0	0	0	0	0	0	0	0	0	1	0	1
hsa-miR-124-5p	MIMAT0004591	ABLIM1	3983	NM_006720	0	0	0	0	0	0	0	0	0	0	1	0	1
hsa-miR-124-5p	MIMAT0004591	ABLIM1	3983	XM_005269827	0	0	0	0	0	0	0	0	0	0	1	0	1
hsa-miR-124-5p	MIMAT0004591	ABLIM1	3983	XM_005269826	0	0	0	0	0	0	0	0	0	0	1	0	1
hsa-miR-124-5p	MIMAT0004591	ABLIM1	3983	XM_005269825	0	0	0	0	0	0	0	0	0	0	1	0	1
hsa-miR-124-5p	MIMAT0004591	ABLIM1	3983	XM_005269823	0	0	0	0	0	0	0	0	0	0	1	0	1
hsa-miR-124-5p	MIMAT0004591	ABLIM1	3983	XM_005269822	0	0	0	0	0	0	0	0	0	0	1	0	1
hsa-miR-124-5p	MIMAT0004591	ABLIM1	3983	XM_005269821	0	0	0	0	0	0	0	0	0	0	1	0	1
hsa-miR-124-5p	MIMAT0004591	ABLIM1	3983	XM_005269820	0	0	0	0	0	0	0	0	0	0	1	0	1
hsa-miR-124-5p	MIMAT0004591	ABLIM1	3983	XM_005269819	0	0	0	0	0	0	0	0	0	0	1	0	1
hsa-miR-124-5p	MIMAT0004591	ABLIM1	3983	NM_002313	0	0	0	0	0	0	0	0	0	0	1	0	1
hsa-miR-124-5p	MIMAT0004591	ABLIM1	3983	NM_001003407	0	0	0	0	0	0	0	0	0	0	1	0	1
hsa-miR-124-5p	MIMAT0004591	ABLIM1	3983	NM_001003408	0	0	0	0	0	0	0	0	0	0	1	0	1
hsa-miR-124-5p	MIMAT0004591	ABLIM1	3983	XM_005269824	0	0	0	0	0	0	0	0	0	0	1	0	1
hsa-miR-124-5p	MIMAT0004591	ABLIM2	84448	XM_005248015	0	0	0	0	0	0	0	0	0	1	1	0	2
hsa-miR-124-5p	MIMAT0004591	ABLIM2	84448	XM_005248031	0	0	0	0	0	0	0	0	0	0	1	0	1
hsa-miR-124-5p	MIMAT0004591	ABLIM2	84448	NM_001130088	0	0	0	0	0	0	0	0	0	0	1	0	1
hsa-miR-124-5p	MIMAT0004591	ABLIM2	84448	XM_005248032	0	0	0	0	0	0	0	0	0	0	1	0	1
hsa-miR-124-5p	MIMAT0004591	ABLIM2	84448	XM_005248030	0	0	0	0	0	0	0	0	0	0	1	0	1
hsa-miR-124-5p	MIMAT0004591	ABLIM2	84448	XM_005248029	0	0	0	0	0	0	0	0	0	0	1	0	1
hsa-miR-124-5p	MIMAT0004591	ABLIM2	84448	XM_005248028	0	0	0	0	0	0	0	0	0	0	1	0	1
hsa-miR-124-5p	MIMAT0004591	ABLIM2	84448	NM_032432	0	0	0	0	0	0	0	0	0	0	1	0	1
hsa-miR-124-5p	MIMAT0004591	ABLIM2	84448	NM_001130087	0	0	0	0	0	0	0	0	0	0	1	0	1
hsa-miR-124-5p	MIMAT0004591	ABLIM2	84448	XM_005248027	0	0	0	0	0	0	0	0	0	0	1	0	1
hsa-miR-124-5p	MIMAT0004591	ABLIM2	84448	XM_005248026	0	0	0	0	0	0	0	0	0	0	1	0	1
hsa-miR-124-5p	MIMAT0004591	ABLIM2	84448	XM_005248025	0	0	0	0	0	0	0	0	0	0	1	0	1
hsa-miR-124-5p	MIMAT0004591	ABLIM2	84448	XM_005248024	0	0	0	0	0	0	0	0	0	0	1	0	1
hsa-miR-124-5p	MIMAT0004591	ABLIM2	84448	NM_001130086	0	0	0	0	0	0	0	0	0	0	1	0	1
hsa-miR-124-5p	MIMAT0004591	ABLIM2	84448	NM_001130085	0	0	0	0	0	0	0	0	0	0	1	0	1
hsa-miR-124-5p	MIMAT0004591	ABLIM2	84448	XM_005248023	0	0	0	0	0	0	0	0	0	0	1	0	1
hsa-miR-124-5p	MIMAT0004591	ABLIM2	84448	XM_005248022	0	0	0	0	0	0	0	0	0	0	1	0	1
hsa-miR-124-5p	MIMAT0004591	ABLIM2	84448	XM_005248021	0	0	0	0	0	0	0	0	0	0	1	0	1
hsa-miR-124-5p	MIMAT0004591	ABLIM2	84448	NM_001130084	0	0	0	0	0	0	0	0	0	0	1	0	1
hsa-miR-124-5p	MIMAT0004591	ABLIM2	84448	XM_005248020	0	0	0	0	0	0	0	0	0	0	1	0	1
hsa-miR-124-5p	MIMAT0004591	ABLIM2	84448	XM_005248019	0	0	0	0	0	0	0	0	0	0	1	0	1
hsa-miR-124-5p	MIMAT0004591	ABLIM2	84448	XM_005248018	0	0	0	0	0	0	0	0	0	0	1	0	1
hsa-miR-124-5p	MIMAT0004591	ABLIM2	84448	XM_005248017	0	0	0	0	0	0	0	0	0	0	1	0	1
hsa-miR-124-5p	MIMAT0004591	ABLIM2	84448	NM_001130083	0	0	0	0	0	0	0	0	0	0	1	0	1
hsa-miR-124-5p	MIMAT0004591	ABLIM2	84448	XM_005248016	0	0	0	0	0	0	0	0	0	0	1	0	1
hsa-miR-124-5p	MIMAT0004591	ABLIM2	84448	XM_005248014	0	0	0	0	0	0	0	0	0	0	1	0	1
hsa-miR-124-5p	MIMAT0004591	ABLIM3	22885	XM_005268397	0	0	0	0	0	0	0	0	0	0	1	0	1
hsa-miR-124-5p	MIMAT0004591	ABLIM3	22885	NM_014945	0	0	0	0	0	0	0	0	0	0	1	0	1
hsa-miR-124-5p	MIMAT0004591	ABLIM3	22885	XM_005268396	0	0	0	0	0	0	0	0	0	0	1	0	1
hsa-miR-124-5p	MIMAT0004591	ABLIM3	22885	XM_005268395	0	0	0	0	0	0	0	0	0	0	1	0	1
hsa-miR-124-5p	MIMAT0004591	ABLIM3	22885	XM_005268394	0	0	0	0	0	0	0	0	0	0	1	0	1
hsa-miR-124-5p	MIMAT0004591	ABLIM3	22885	XM_005268393	0	0	0	0	0	0	0	0	0	0	1	0	1
hsa-miR-124-5p	MIMAT0004591	ABLIM3	22885	XM_005268392	0	0	0	0	0	0	0	0	0	0	1	0	1
hsa-miR-124-5p	MIMAT0004591	ABLIM3	22885	XM_005268391	0	0	0	0	0	0	0	0	0	0	1	0	1
hsa-miR-124-5p	MIMAT0004591	ABR	29	NM_001159746	0	0	0	0	0	0	0	0	0	1	1	0	2
hsa-miR-124-5p	MIMAT0004591	ABR	29	NM_001256847	0	0	0	0	0	0	0	0	0	0	1	0	1
hsa-miR-124-5p	MIMAT0004591	ABR	29	NM_001092	0	0	0	0	0	0	0	0	0	0	1	0	1
hsa-miR-124-5p	MIMAT0004591	ABR	29	NM_021962	0	0	0	0	0	0	0	0	0	0	1	0	1
hsa-miR-124-5p	MIMAT0004591	ABRA	137735	NM_139166	0	0	0	0	0	0	0	0	0	0	1	0	1
hsa-miR-124-5p	MIMAT0004591	ABRACL	58527	NM_021243	0	0	0	0	0	0	0	0	0	0	1	0	1
hsa-miR-124-5p	MIMAT0004591	ABT1	29777	NM_013375	0	0	0	0	0	0	0	0	0	0	1	0	1
hsa-miR-124-5p	MIMAT0004591	ABTB1	80325	NM_032548	0	0	0	0	0	0	0	0	0	0	1	0	1
hsa-miR-124-5p	MIMAT0004591	ABTB1	80325	NM_172027	0	0	0	0	0	0	0	0	0	0	1	0	1
hsa-miR-124-5p	MIMAT0004591	ABTB2	25841	NM_145804	0	0	0	0	0	0	0	0	0	0	1	0	1
hsa-miR-124-5p	MIMAT0004591	ACAA1	30	NM_001607	1	0	1	0	0	1	0	0	0	1	1	1	6
hsa-miR-124-5p	MIMAT0004591	ACAA1	30	NM_001130410	1	0	1	0	0	1	0	0	0	0	1	1	5
hsa-miR-124-5p	MIMAT0004591	ACACA	31	NM_198839	0	0	0	0	0	0	0	0	0	0	1	0	1
hsa-miR-124-5p	MIMAT0004591	ACACA	31	XM_005257268	0	0	0	0	0	0	0	0	0	0	1	0	1
hsa-miR-124-5p	MIMAT0004591	ACACA	31	XM_005257266	0	0	0	0	0	0	0	0	0	0	1	0	1
hsa-miR-124-5p	MIMAT0004591	ACACA	31	XM_005257267	0	0	0	0	0	0	0	0	0	0	1	0	1
hsa-miR-124-5p	MIMAT0004591	ACACA	31	NM_198836	0	0	0	0	0	0	0	0	0	0	1	0	1
hsa-miR-124-5p	MIMAT0004591	ACACA	31	NM_198837	0	0	0	0	0	0	0	0	0	0	1	0	1
hsa-miR-124-5p	MIMAT0004591	ACACA	31	NM_198838	0	0	0	0	0	0	0	0	0	0	1	0	1
hsa-miR-124-5p	MIMAT0004591	ACACA	31	NM_198834	0	0	0	0	0	0	0	0	0	0	1	0	1
hsa-miR-124-5p	MIMAT0004591	ACACB	32	XM_005253876	0	0	0	0	0	0	0	0	0	0	1	0	1
hsa-miR-124-5p	MIMAT0004591	ACACB	32	XM_005253877	0	0	0	0	0	0	0	0	0	0	1	0	1
hsa-miR-124-5p	MIMAT0004591	ACACB	32	NM_001093	0	0	0	0	0	0	0	0	0	0	1	0	1
hsa-miR-124-5p	MIMAT0004591	ACAD10	80724	XM_005253941	0	0	1	0	0	1	0	0	0	0	1	1	4
hsa-miR-124-5p	MIMAT0004591	ACAD10	80724	XM_005253942	0	0	1	0	0	1	0	0	0	0	1	1	4
hsa-miR-124-5p	MIMAT0004591	ACAD10	80724	NM_025247	0	0	1	0	0	1	0	0	0	0	1	1	4
hsa-miR-124-5p	MIMAT0004591	ACAD10	80724	NM_001136538	0	0	1	0	0	1	0	0	0	0	1	1	4
hsa-miR-124-5p	MIMAT0004591	ACAD10	80724	XM_005253943	0	0	0	0	0	1	0	0	0	0	1	0	2
hsa-miR-124-5p	MIMAT0004591	ACAD11	84129	XM_005247828	0	0	1	0	0	0	0	0	0	0	1	1	3
hsa-miR-124-5p	MIMAT0004591	ACAD11	84129	NM_032169	0	1	0	0	0	0	0	0	0	0	1	0	2
hsa-miR-124-5p	MIMAT0004591	ACAD8	27034	XM_005271504	0	0	0	0	0	1	0	0	0	0	1	1	3
hsa-miR-124-5p	MIMAT0004591	ACAD8	27034	NM_014384	0	0	0	0	0	1	0	0	0	0	1	1	3
hsa-miR-124-5p	MIMAT0004591	ACAD8	27034	XM_005271501	0	0	0	0	0	1	0	0	0	0	1	0	2
hsa-miR-124-5p	MIMAT0004591	ACAD8	27034	XM_005271503	0	0	0	0	0	1	0	0	0	0	1	0	2
hsa-miR-124-5p	MIMAT0004591	ACAD8	27034	XM_005271502	0	0	0	0	0	1	0	0	0	0	1	0	2
hsa-miR-124-5p	MIMAT0004591	ACAD8	27034	XM_005271505	0	0	0	0	0	1	0	0	0	0	0	0	1
hsa-miR-124-5p	MIMAT0004591	ACAD9	28976	NM_014049	0	0	0	0	0	0	0	0	0	0	1	0	1
hsa-miR-124-5p	MIMAT0004591	ACADL	33	XM_005246517	0	0	0	0	0	1	0	0	0	1	1	1	4
hsa-miR-124-5p	MIMAT0004591	ACADL	33	NM_001608	0	0	0	0	0	1	0	0	0	0	1	1	3
hsa-miR-124-5p	MIMAT0004591	ACADM	34	NM_001127328	0	1	0	0	0	1	0	0	0	0	1	1	4
hsa-miR-124-5p	MIMAT0004591	ACADM	34	XM_005270814	0	0	0	0	0	1	0	0	0	0	1	1	3
hsa-miR-124-5p	MIMAT0004591	ACADM	34	XM_005270811	0	0	0	0	0	1	0	0	0	0	1	1	3
hsa-miR-124-5p	MIMAT0004591	ACADM	34	XM_005270813	0	0	0	0	0	1	0	0	0	0	1	1	3
hsa-miR-124-5p	MIMAT0004591	ACADM	34	XM_005270812	0	0	0	0	0	1	0	0	0	0	1	1	3
hsa-miR-124-5p	MIMAT0004591	ACADM	34	NM_000016	0	0	0	0	0	1	0	0	0	0	1	1	3
hsa-miR-124-5p	MIMAT0004591	ACADS	35	NM_000017	0	0	0	0	0	0	0	0	0	0	1	0	1
hsa-miR-124-5p	MIMAT0004591	ACADS	35	XM_005253878	0	0	0	0	0	0	0	0	0	0	1	0	1
hsa-miR-124-5p	MIMAT0004591	ACADSB	36	NM_001609	0	0	0	0	0	0	0	0	0	1	1	0	2
hsa-miR-124-5p	MIMAT0004591	ACADSB	36	XM_005269772	0	0	0	0	0	0	0	0	0	0	1	0	1
hsa-miR-124-5p	MIMAT0004591	ACADVL	37	NM_001270448	0	0	0	0	0	0	0	0	0	0	1	0	1
hsa-miR-124-5p	MIMAT0004591	ACADVL	37	NM_001033859	0	0	0	0	0	0	0	0	0	0	1	0	1
hsa-miR-124-5p	MIMAT0004591	ACADVL	37	NM_001270447	0	0	0	0	0	0	0	0	0	0	1	0	1
hsa-miR-124-5p	MIMAT0004591	ACADVL	37	NM_000018	0	0	0	0	0	0	0	0	0	0	1	0	1
hsa-miR-124-5p	MIMAT0004591	ACAN	176	NM_013227	0	0	0	0	0	0	0	0	0	0	1	0	1
hsa-miR-124-5p	MIMAT0004591	ACAN	176	NM_001135	0	0	0	0	0	0	0	0	0	0	1	0	1
hsa-miR-124-5p	MIMAT0004591	ACAP2	23527	XM_005269314	0	0	0	0	0	0	0	0	0	0	1	0	1
hsa-miR-124-5p	MIMAT0004591	ACAP2	23527	NM_012287	0	0	0	0	0	0	0	0	0	0	1	0	1
hsa-miR-124-5p	MIMAT0004591	ACAP3	116983	NM_030649	0	1	0	0	0	1	0	0	0	1	1	0	4
hsa-miR-124-5p	MIMAT0004591	ACAP3	116983	XM_005244717	0	0	0	0	0	1	0	0	0	0	1	0	2
hsa-miR-124-5p	MIMAT0004591	ACAP3	116983	XM_005244715	0	0	0	0	0	1	0	0	0	0	1	0	2
hsa-miR-124-5p	MIMAT0004591	ACAP3	116983	XM_005244714	0	0	0	0	0	1	0	0	0	0	1	0	2
hsa-miR-124-5p	MIMAT0004591	ACAP3	116983	XM_005244716	0	0	0	0	0	1	0	0	0	0	1	0	2
hsa-miR-124-5p	MIMAT0004591	ACAT1	38	NM_000019	0	0	0	0	0	1	0	0	0	1	1	1	4
hsa-miR-124-5p	MIMAT0004591	ACAT2	39	XM_005266980	0	0	0	0	0	0	0	0	0	0	1	0	1
hsa-miR-124-5p	MIMAT0004591	ACAT2	39	NM_005891	0	0	0	0	0	0	0	0	0	0	1	0	1
hsa-miR-124-5p	MIMAT0004591	ACBD3	64746	NM_022735	1	1	0	0	0	1	0	0	0	0	1	0	4
hsa-miR-124-5p	MIMAT0004591	ACBD4	79777	XM_005257676	0	0	0	0	0	0	0	0	0	0	1	0	1
hsa-miR-124-5p	MIMAT0004591	ACBD4	79777	XM_005257683	0	0	0	0	0	0	0	0	0	0	1	0	1
hsa-miR-124-5p	MIMAT0004591	ACBD4	79777	XM_005257682	0	0	0	0	0	0	0	0	0	0	1	0	1
hsa-miR-124-5p	MIMAT0004591	ACBD4	79777	NM_001135705	0	0	0	0	0	0	0	0	0	0	1	0	1
hsa-miR-124-5p	MIMAT0004591	ACBD4	79777	XM_005257681	0	0	0	0	0	0	0	0	0	0	1	0	1
hsa-miR-124-5p	MIMAT0004591	ACBD4	79777	NM_001135706	0	0	0	0	0	0	0	0	0	0	1	0	1
hsa-miR-124-5p	MIMAT0004591	ACBD4	79777	XM_005257679	0	0	0	0	0	0	0	0	0	0	1	0	1
hsa-miR-124-5p	MIMAT0004591	ACBD4	79777	XM_005257678	0	0	0	0	0	0	0	0	0	0	1	0	1
hsa-miR-124-5p	MIMAT0004591	ACBD4	79777	XM_005257673	0	0	0	0	0	0	0	0	0	0	1	0	1
hsa-miR-124-5p	MIMAT0004591	ACBD4	79777	XM_005257677	0	0	0	0	0	0	0	0	0	0	1	0	1
hsa-miR-124-5p	MIMAT0004591	ACBD4	79777	XM_005257674	0	0	0	0	0	0	0	0	0	0	1	0	1
hsa-miR-124-5p	MIMAT0004591	ACBD4	79777	XM_005257675	0	0	0	0	0	0	0	0	0	0	1	0	1
hsa-miR-124-5p	MIMAT0004591	ACBD4	79777	NM_024722	0	0	0	0	0	0	0	0	0	0	1	0	1
hsa-miR-124-5p	MIMAT0004591	ACBD4	79777	NM_001135704	0	0	0	0	0	0	0	0	0	0	1	0	1
hsa-miR-124-5p	MIMAT0004591	ACBD4	79777	XM_005257680	0	0	0	0	0	0	0	0	0	0	1	0	1
hsa-miR-124-5p	MIMAT0004591	ACBD5	91452	NM_001271512	0	0	0	0	0	0	0	0	0	0	1	0	1
hsa-miR-124-5p	MIMAT0004591	ACBD5	91452	NM_001042473	0	0	0	0	0	0	0	0	0	0	1	0	1
hsa-miR-124-5p	MIMAT0004591	ACBD5	91452	NM_145698	0	0	0	0	0	0	0	0	0	0	1	0	1
hsa-miR-124-5p	MIMAT0004591	ACBD7	414149	NM_001039844	0	0	0	0	0	0	0	0	0	0	1	1	2
hsa-miR-124-5p	MIMAT0004591	ACBD7	414149	XM_005252453	0	0	0	0	0	0	0	0	0	0	1	0	1
hsa-miR-124-5p	MIMAT0004591	ACCS	84680	XM_005253173	0	0	0	0	0	0	0	0	0	0	1	0	1
hsa-miR-124-5p	MIMAT0004591	ACCS	84680	XM_005253172	0	0	0	0	0	0	0	0	0	0	1	0	1
hsa-miR-124-5p	MIMAT0004591	ACCS	84680	NM_001127219	0	0	0	0	0	0	0	0	0	0	1	0	1
hsa-miR-124-5p	MIMAT0004591	ACCS	84680	XM_005253170	0	0	0	0	0	0	0	0	0	0	1	0	1
hsa-miR-124-5p	MIMAT0004591	ACCS	84680	XM_005253171	0	0	0	0	0	0	0	0	0	0	1	0	1
hsa-miR-124-5p	MIMAT0004591	ACCS	84680	NM_032592	0	0	0	0	0	0	0	0	0	0	1	0	1
hsa-miR-124-5p	MIMAT0004591	ACE	1636	NM_000789	0	0	0	0	0	1	0	0	0	1	1	0	3
hsa-miR-124-5p	MIMAT0004591	ACE	1636	NM_001178057	0	0	0	0	0	1	0	0	0	0	1	0	2
hsa-miR-124-5p	MIMAT0004591	ACE	1636	NM_152830	0	0	0	0	0	1	0	0	0	0	1	0	2
hsa-miR-124-5p	MIMAT0004591	ACE	1636	XM_005257110	0	0	0	0	0	1	0	0	0	0	1	0	2
hsa-miR-124-5p	MIMAT0004591	ACE2	59272	NM_021804	0	0	0	0	0	0	0	0	0	1	1	0	2
hsa-miR-124-5p	MIMAT0004591	ACER1	125981	NM_133492	0	0	0	0	0	0	0	0	0	0	1	0	1
hsa-miR-124-5p	MIMAT0004591	ACER2	340485	XM_005251448	0	0	0	0	0	0	0	0	0	0	1	0	1
hsa-miR-124-5p	MIMAT0004591	ACER2	340485	XM_005251447	0	0	0	0	0	0	0	0	0	0	1	0	1
hsa-miR-124-5p	MIMAT0004591	ACER2	340485	XM_005251449	0	0	0	0	0	0	0	0	0	0	1	0	1
hsa-miR-124-5p	MIMAT0004591	ACER2	340485	NM_001010887	0	0	0	0	0	0	0	0	0	0	1	0	1
hsa-miR-124-5p	MIMAT0004591	ACER3	55331	NM_018367	1	0	0	0	0	0	0	0	0	0	1	0	2
hsa-miR-124-5p	MIMAT0004591	ACER3	55331	XM_005274086	1	0	0	0	0	0	0	0	0	0	1	0	2
hsa-miR-124-5p	MIMAT0004591	ACER3	55331	XM_005274090	1	0	0	0	0	0	0	0	0	0	1	0	2
hsa-miR-124-5p	MIMAT0004591	ACER3	55331	XM_005274088	1	0	0	0	0	0	0	0	0	0	1	0	2
hsa-miR-124-5p	MIMAT0004591	ACER3	55331	XM_005274091	1	0	0	0	0	0	0	0	0	0	1	0	2
hsa-miR-124-5p	MIMAT0004591	ACER3	55331	XM_005274089	1	0	0	0	0	0	0	0	0	0	1	0	2
hsa-miR-124-5p	MIMAT0004591	ACER3	55331	XM_005274087	1	0	0	0	0	0	0	0	0	0	1	0	2
hsa-miR-124-5p	MIMAT0004591	ACER3	55331	XM_005274092	0	0	0	0	0	0	0	0	0	0	1	0	1
hsa-miR-124-5p	MIMAT0004591	ACHE	43	NM_015831	1	1	0	0	0	0	0	0	0	1	1	0	4
hsa-miR-124-5p	MIMAT0004591	ACHE	43	XM_005250357	1	0	0	0	0	0	0	0	0	0	0	0	1
hsa-miR-124-5p	MIMAT0004591	ACIN1	22985	NM_014977	0	0	0	0	0	0	0	0	0	0	1	0	1
hsa-miR-124-5p	MIMAT0004591	ACIN1	22985	NM_001164816	0	0	0	0	0	0	0	0	0	0	1	0	1
hsa-miR-124-5p	MIMAT0004591	ACIN1	22985	NM_001164817	0	0	0	0	0	0	0	0	0	0	1	0	1
hsa-miR-124-5p	MIMAT0004591	ACIN1	22985	XM_005267418	0	0	0	0	0	0	0	0	0	0	1	0	1
hsa-miR-124-5p	MIMAT0004591	ACIN1	22985	XM_005267417	0	0	0	0	0	0	0	0	0	0	1	0	1
hsa-miR-124-5p	MIMAT0004591	ACIN1	22985	XM_005267416	0	0	0	0	0	0	0	0	0	0	1	0	1
hsa-miR-124-5p	MIMAT0004591	ACIN1	22985	XM_005267415	0	0	0	0	0	0	0	0	0	0	1	0	1
hsa-miR-124-5p	MIMAT0004591	ACIN1	22985	NM_001164815	0	0	0	0	0	0	0	0	0	0	1	0	1
hsa-miR-124-5p	MIMAT0004591	ACIN1	22985	NM_001164814	0	0	0	0	0	0	0	0	0	0	1	0	1
hsa-miR-124-5p	MIMAT0004591	ACKR2	1238	XM_005264858	0	1	0	0	0	0	0	0	0	0	1	0	2
hsa-miR-124-5p	MIMAT0004591	ACKR2	1238	XM_005264860	0	0	0	0	0	0	0	0	0	0	1	0	1
hsa-miR-124-5p	MIMAT0004591	ACKR2	1238	XM_005264859	0	0	0	0	0	0	0	0	0	0	1	0	1
hsa-miR-124-5p	MIMAT0004591	ACKR2	1238	NM_001296	0	0	0	0	0	0	0	0	0	0	1	0	1
hsa-miR-124-5p	MIMAT0004591	ACKR2	1238	XM_005264857	0	0	0	0	0	0	0	0	0	0	1	0	1
hsa-miR-124-5p	MIMAT0004591	ACKR2	1238	XM_005264856	0	0	0	0	0	0	0	0	0	0	1	0	1
hsa-miR-124-5p	MIMAT0004591	ACKR3	57007	NM_020311	0	0	0	0	0	0	0	0	0	0	1	0	1
hsa-miR-124-5p	MIMAT0004591	ACKR3	57007	XM_005246097	0	0	0	0	0	0	0	0	0	0	1	0	1
hsa-miR-124-5p	MIMAT0004591	ACKR3	57007	XM_005246098	0	0	0	0	0	0	0	0	0	0	1	0	1
hsa-miR-124-5p	MIMAT0004591	ACKR4	51554	NM_178445	0	1	0	0	0	0	0	0	0	0	1	0	2
hsa-miR-124-5p	MIMAT0004591	ACKR4	51554	NM_016557	0	0	0	0	0	0	0	0	0	0	1	0	1
hsa-miR-124-5p	MIMAT0004591	ACLY	47	NM_001096	1	0	0	0	0	0	0	0	0	0	1	0	2
hsa-miR-124-5p	MIMAT0004591	ACLY	47	XM_005257397	1	0	0	0	0	0	0	0	0	0	1	0	2
hsa-miR-124-5p	MIMAT0004591	ACLY	47	XM_005277027	1	0	0	0	0	0	0	0	0	0	1	0	2
hsa-miR-124-5p	MIMAT0004591	ACLY	47	XM_005257396	1	0	0	0	0	0	0	0	0	0	1	0	2
hsa-miR-124-5p	MIMAT0004591	ACLY	47	XM_005277026	1	0	0	0	0	0	0	0	0	0	1	0	2
hsa-miR-124-5p	MIMAT0004591	ACLY	47	XM_005257394	1	0	0	0	0	0	0	0	0	0	1	0	2
hsa-miR-124-5p	MIMAT0004591	ACLY	47	XM_005277024	1	0	0	0	0	0	0	0	0	0	1	0	2
hsa-miR-124-5p	MIMAT0004591	ACLY	47	XM_005257393	1	0	0	0	0	0	0	0	0	0	1	0	2
hsa-miR-124-5p	MIMAT0004591	ACLY	47	XM_005277023	1	0	0	0	0	0	0	0	0	0	1	0	2
hsa-miR-124-5p	MIMAT0004591	ACLY	47	XM_005257395	1	0	0	0	0	0	0	0	0	0	1	0	2
hsa-miR-124-5p	MIMAT0004591	ACLY	47	XM_005277025	1	0	0	0	0	0	0	0	0	0	1	0	2
hsa-miR-124-5p	MIMAT0004591	ACLY	47	NM_198830	1	0	0	0	0	0	0	0	0	0	1	0	2
hsa-miR-124-5p	MIMAT0004591	ACMSD	130013	XM_005263587	0	0	0	0	0	0	0	0	0	0	1	0	1
hsa-miR-124-5p	MIMAT0004591	ACMSD	130013	XM_005263590	0	0	0	0	0	0	0	0	0	0	1	0	1
hsa-miR-124-5p	MIMAT0004591	ACMSD	130013	XM_005263588	0	0	0	0	0	0	0	0	0	0	1	0	1
hsa-miR-124-5p	MIMAT0004591	ACMSD	130013	XM_005263589	0	0	0	0	0	0	0	0	0	0	1	0	1
hsa-miR-124-5p	MIMAT0004591	ACMSD	130013	NM_138326	0	0	0	0	0	0	0	0	0	0	1	0	1
hsa-miR-124-5p	MIMAT0004591	ACMSD	130013	XM_005263586	0	0	0	0	0	0	0	0	0	0	1	0	1
hsa-miR-124-5p	MIMAT0004591	ACN9	57001	NM_020186	0	0	0	0	0	0	0	0	0	0	1	0	1
hsa-miR-124-5p	MIMAT0004591	ACO1	48	NM_001278352	1	1	1	0	0	1	0	0	0	1	1	1	7
hsa-miR-124-5p	MIMAT0004591	ACO1	48	XM_005251477	1	0	1	0	0	1	0	0	0	0	1	1	5
hsa-miR-124-5p	MIMAT0004591	ACO1	48	XM_005251476	1	0	1	0	0	1	0	0	0	0	1	1	5
hsa-miR-124-5p	MIMAT0004591	ACO1	48	NM_002197	1	0	1	0	0	1	0	0	0	0	1	1	5
hsa-miR-124-5p	MIMAT0004591	ACO2	50	NM_001098	1	0	0	0	0	0	0	0	0	0	0	0	1
hsa-miR-124-5p	MIMAT0004591	ACOT11	26027	XM_005270730	0	0	0	0	0	1	0	0	0	1	1	0	3
hsa-miR-124-5p	MIMAT0004591	ACOT11	26027	NM_147161	0	0	0	0	0	1	0	0	0	0	1	0	2
hsa-miR-124-5p	MIMAT0004591	ACOT11	26027	XM_005270734	0	0	0	0	0	1	0	0	0	0	1	0	2
hsa-miR-124-5p	MIMAT0004591	ACOT11	26027	XM_005270732	0	0	0	0	0	1	0	0	0	0	1	0	2
hsa-miR-124-5p	MIMAT0004591	ACOT11	26027	XM_005270733	0	0	0	0	0	1	0	0	0	0	1	0	2
hsa-miR-124-5p	MIMAT0004591	ACOT11	26027	XM_005270731	0	0	0	0	0	1	0	0	0	0	1	0	2
hsa-miR-124-5p	MIMAT0004591	ACOT11	26027	NM_015547	0	0	0	0	0	1	0	0	0	0	0	0	1
hsa-miR-124-5p	MIMAT0004591	ACOT12	134526	XM_005248438	0	0	0	0	0	0	0	0	0	0	1	0	1
hsa-miR-124-5p	MIMAT0004591	ACOT12	134526	NM_130767	0	0	0	0	0	0	0	0	0	0	1	0	1
hsa-miR-124-5p	MIMAT0004591	ACOT13	55856	NM_001160094	1	0	0	0	0	1	0	0	0	0	1	1	4
hsa-miR-124-5p	MIMAT0004591	ACOT13	55856	NM_018473	1	0	0	0	0	1	0	0	0	0	1	1	4
hsa-miR-124-5p	MIMAT0004591	ACOT7	11332	NM_007274	0	0	0	0	0	0	0	0	0	0	1	0	1
hsa-miR-124-5p	MIMAT0004591	ACOT7	11332	NM_181866	0	0	0	0	0	0	0	0	0	0	1	0	1
hsa-miR-124-5p	MIMAT0004591	ACOT7	11332	NM_181865	0	0	0	0	0	0	0	0	0	0	1	0	1
hsa-miR-124-5p	MIMAT0004591	ACOT7	11332	XM_005263427	0	0	0	0	0	0	0	0	0	0	1	0	1
hsa-miR-124-5p	MIMAT0004591	ACOT7	11332	NM_181864	0	0	0	0	0	0	0	0	0	0	1	0	1
hsa-miR-124-5p	MIMAT0004591	ACOT8	10005	XM_005260242	0	0	0	0	0	0	0	0	0	1	1	0	2
hsa-miR-124-5p	MIMAT0004591	ACOT9	23597	XM_005274471	1	0	0	0	0	0	0	0	0	1	1	0	3
hsa-miR-124-5p	MIMAT0004591	ACOT9	23597	XM_005274472	1	0	0	0	0	0	0	0	0	0	1	0	2
hsa-miR-124-5p	MIMAT0004591	ACOT9	23597	NM_001033583	1	0	0	0	0	0	0	0	0	0	1	0	2
hsa-miR-124-5p	MIMAT0004591	ACOT9	23597	NM_001037171	1	0	0	0	0	0	0	0	0	0	1	0	2
hsa-miR-124-5p	MIMAT0004591	ACOT9	23597	XM_005274470	1	0	0	0	0	0	0	0	0	0	1	0	2
hsa-miR-124-5p	MIMAT0004591	ACOX1	51	NM_001185039	1	1	0	0	0	1	0	0	0	0	1	0	4
hsa-miR-124-5p	MIMAT0004591	ACOX1	51	NM_004035	1	0	0	0	0	1	0	0	0	0	1	0	3
hsa-miR-124-5p	MIMAT0004591	ACOX1	51	NM_007292	1	0	0	0	0	1	0	0	0	0	1	0	3
hsa-miR-124-5p	MIMAT0004591	ACOX1	51	XM_005257423	0	0	0	0	0	1	0	0	0	0	1	0	2
hsa-miR-124-5p	MIMAT0004591	ACOX2	8309	NM_003500	0	1	0	0	0	0	0	0	0	0	0	0	1
hsa-miR-124-5p	MIMAT0004591	ACOX3	8310	XM_005248011	1	0	0	0	0	1	0	0	0	0	1	0	3
hsa-miR-124-5p	MIMAT0004591	ACOX3	8310	NM_001101667	1	0	0	0	0	1	0	0	0	0	1	0	3
hsa-miR-124-5p	MIMAT0004591	ACOX3	8310	XM_005248012	1	0	0	0	0	1	0	0	0	0	1	0	3
hsa-miR-124-5p	MIMAT0004591	ACOX3	8310	XM_005248013	1	0	0	0	0	1	0	0	0	0	1	0	3
hsa-miR-124-5p	MIMAT0004591	ACOX3	8310	NM_003501	1	0	0	0	0	1	0	0	0	0	1	0	3
hsa-miR-124-5p	MIMAT0004591	ACOXL	55289	NM_001142807	0	0	0	0	0	0	0	0	0	0	1	0	1
hsa-miR-124-5p	MIMAT0004591	ACP1	52	NM_004300	0	0	0	0	0	0	0	0	0	1	1	0	2
hsa-miR-124-5p	MIMAT0004591	ACP1	52	NM_007099	0	0	0	0	0	0	0	0	0	1	1	0	2
hsa-miR-124-5p	MIMAT0004591	ACP1	52	NM_001040649	0	0	0	0	0	0	0	0	0	0	1	0	1
hsa-miR-124-5p	MIMAT0004591	ACP2	53	NM_001610	0	0	0	0	0	0	0	0	0	0	1	0	1
hsa-miR-124-5p	MIMAT0004591	ACP2	53	XM_005252985	0	0	0	0	0	0	0	0	0	0	1	0	1
hsa-miR-124-5p	MIMAT0004591	ACP2	53	XM_005252983	0	0	0	0	0	0	0	0	0	0	1	0	1
hsa-miR-124-5p	MIMAT0004591	ACP2	53	XM_005252982	0	0	0	0	0	0	0	0	0	0	1	0	1
hsa-miR-124-5p	MIMAT0004591	ACP2	53	XM_005252984	0	0	0	0	0	0	0	0	0	0	1	0	1
hsa-miR-124-5p	MIMAT0004591	ACP2	53	XM_005252981	0	0	0	0	0	0	0	0	0	0	1	0	1
hsa-miR-124-5p	MIMAT0004591	ACP5	54	XM_005259938	0	0	0	0	0	0	0	0	0	0	1	0	1
hsa-miR-124-5p	MIMAT0004591	ACP5	54	NM_001611	0	0	0	0	0	0	0	0	0	0	1	0	1
hsa-miR-124-5p	MIMAT0004591	ACP5	54	XM_005259939	0	0	0	0	0	0	0	0	0	0	1	0	1
hsa-miR-124-5p	MIMAT0004591	ACP5	54	NM_001111036	0	0	0	0	0	0	0	0	0	0	1	0	1
hsa-miR-124-5p	MIMAT0004591	ACP5	54	NM_001111034	0	0	0	0	0	0	0	0	0	0	1	0	1
hsa-miR-124-5p	MIMAT0004591	ACP5	54	NM_001111035	0	0	0	0	0	0	0	0	0	0	1	0	1
hsa-miR-124-5p	MIMAT0004591	ACP6	51205	NM_016361	0	0	0	0	0	0	0	0	0	0	1	0	1
hsa-miR-124-5p	MIMAT0004591	ACP6	51205	XM_005272963	0	0	0	0	0	0	0	0	0	0	1	0	1
hsa-miR-124-5p	MIMAT0004591	ACPL2	92370	XM_005247902	0	0	0	0	0	0	0	0	0	1	1	0	2
hsa-miR-124-5p	MIMAT0004591	ACPL2	92370	XM_005247903	0	0	0	0	0	0	0	0	0	0	1	0	1
hsa-miR-124-5p	MIMAT0004591	ACPL2	92370	NM_001037172	0	0	0	0	0	0	0	0	0	0	1	0	1
hsa-miR-124-5p	MIMAT0004591	ACPL2	92370	NM_152282	0	0	0	0	0	0	0	0	0	0	1	0	1
hsa-miR-124-5p	MIMAT0004591	ACPP	55	NM_001134194	1	0	1	0	0	1	0	0	0	0	1	1	5
hsa-miR-124-5p	MIMAT0004591	ACPP	55	NM_001099	0	1	0	0	0	1	0	0	0	1	1	0	4
hsa-miR-124-5p	MIMAT0004591	ACPP	55	XM_005247567	0	0	0	0	0	1	0	0	0	0	1	0	2
hsa-miR-124-5p	MIMAT0004591	ACRBP	84519	NM_032489	0	1	0	0	0	0	0	0	0	0	0	0	1
hsa-miR-124-5p	MIMAT0004591	ACRBP	84519	XM_005253801	0	0	0	0	0	0	0	0	0	0	1	0	1
hsa-miR-124-5p	MIMAT0004591	ACRC	93953	NM_052957	0	0	0	0	0	0	0	0	0	0	1	0	1
hsa-miR-124-5p	MIMAT0004591	ACRC	93953	XM_005262312	0	0	0	0	0	0	0	0	0	0	1	0	1
hsa-miR-124-5p	MIMAT0004591	ACRC	93953	XM_005262313	0	0	0	0	0	0	0	0	0	0	1	0	1
hsa-miR-124-5p	MIMAT0004591	ACRV1	56	NM_001612	0	0	0	0	0	0	0	0	0	0	1	0	1
hsa-miR-124-5p	MIMAT0004591	ACRV1	56	NM_020108	0	0	0	0	0	0	0	0	0	0	1	0	1
hsa-miR-124-5p	MIMAT0004591	ACRV1	56	NM_020107	0	0	0	0	0	0	0	0	0	0	1	0	1
hsa-miR-124-5p	MIMAT0004591	ACRV1	56	XM_005271610	0	0	0	0	0	0	0	0	0	0	1	0	1
hsa-miR-124-5p	MIMAT0004591	ACRV1	56	NM_020069	0	0	0	0	0	0	0	0	0	0	1	0	1
hsa-miR-124-5p	MIMAT0004591	ACSBG1	23205	NM_015162	0	0	0	0	0	0	0	0	0	0	1	0	1
hsa-miR-124-5p	MIMAT0004591	ACSBG1	23205	NM_001199377	0	0	0	0	0	0	0	0	0	0	1	0	1
hsa-miR-124-5p	MIMAT0004591	ACSBG2	81616	XM_005259653	1	0	0	0	0	0	0	0	0	0	0	0	1
hsa-miR-124-5p	MIMAT0004591	ACSF2	80221	NM_025149	0	1	0	0	0	0	0	0	0	0	1	0	2
hsa-miR-124-5p	MIMAT0004591	ACSF2	80221	XM_005257701	0	0	0	0	0	0	0	0	0	0	1	0	1
hsa-miR-124-5p	MIMAT0004591	ACSF2	80221	XM_005257700	0	0	0	0	0	0	0	0	0	0	1	0	1
hsa-miR-124-5p	MIMAT0004591	ACSF2	80221	XM_005257699	0	0	0	0	0	0	0	0	0	0	1	0	1
hsa-miR-124-5p	MIMAT0004591	ACSF2	80221	XM_005257698	0	0	0	0	0	0	0	0	0	0	1	0	1
hsa-miR-124-5p	MIMAT0004591	ACSF3	197322	NM_001243279	0	0	0	0	0	0	0	0	0	0	1	0	1
hsa-miR-124-5p	MIMAT0004591	ACSF3	197322	NM_001127214	0	0	0	0	0	0	0	0	0	0	1	0	1
hsa-miR-124-5p	MIMAT0004591	ACSF3	197322	NM_174917	0	0	0	0	0	0	0	0	0	0	1	0	1
hsa-miR-124-5p	MIMAT0004591	ACSL1	2180	XM_005262831	0	1	0	0	0	1	0	0	0	1	1	0	4
hsa-miR-124-5p	MIMAT0004591	ACSL1	2180	XM_005262833	0	0	0	0	0	1	0	0	0	0	1	0	2
hsa-miR-124-5p	MIMAT0004591	ACSL1	2180	XM_005262828	0	0	0	0	0	1	0	0	0	0	1	0	2
hsa-miR-124-5p	MIMAT0004591	ACSL1	2180	XM_005262832	0	0	0	0	0	1	0	0	0	0	1	0	2
hsa-miR-124-5p	MIMAT0004591	ACSL1	2180	XM_005262829	0	0	0	0	0	1	0	0	0	0	1	0	2
hsa-miR-124-5p	MIMAT0004591	ACSL1	2180	XM_005262830	0	0	0	0	0	1	0	0	0	0	1	0	2
hsa-miR-124-5p	MIMAT0004591	ACSL1	2180	XM_005262827	0	0	0	0	0	1	0	0	0	0	1	0	2
hsa-miR-124-5p	MIMAT0004591	ACSL1	2180	NM_001995	0	0	0	0	0	1	0	0	0	0	1	0	2
hsa-miR-124-5p	MIMAT0004591	ACSL3	2181	NM_004457	0	0	0	0	0	0	0	0	0	0	1	0	1
hsa-miR-124-5p	MIMAT0004591	ACSL3	2181	NM_203372	0	0	0	0	0	0	0	0	0	0	1	0	1
hsa-miR-124-5p	MIMAT0004591	ACSL4	2182	NM_022977	0	1	0	0	0	1	0	0	0	1	1	0	4
hsa-miR-124-5p	MIMAT0004591	ACSL4	2182	XM_005262110	0	0	0	0	0	1	0	0	0	0	1	0	2
hsa-miR-124-5p	MIMAT0004591	ACSL4	2182	NM_004458	0	0	0	0	0	1	0	0	0	0	1	0	2
hsa-miR-124-5p	MIMAT0004591	ACSL4	2182	XM_005262109	0	0	0	0	0	1	0	0	0	0	1	0	2
hsa-miR-124-5p	MIMAT0004591	ACSL4	2182	XM_005262108	0	0	0	0	0	1	0	0	0	0	1	0	2
hsa-miR-124-5p	MIMAT0004591	ACSL5	51703	NM_203380	0	0	0	0	0	0	0	0	0	1	1	0	2
hsa-miR-124-5p	MIMAT0004591	ACSL5	51703	XM_005269898	0	0	0	0	0	0	0	0	0	0	1	0	1
hsa-miR-124-5p	MIMAT0004591	ACSL5	51703	XM_005269899	0	0	0	0	0	0	0	0	0	0	1	0	1
hsa-miR-124-5p	MIMAT0004591	ACSL5	51703	XM_005269897	0	0	0	0	0	0	0	0	0	0	1	0	1
hsa-miR-124-5p	MIMAT0004591	ACSL5	51703	NM_203379	0	0	0	0	0	0	0	0	0	0	1	0	1
hsa-miR-124-5p	MIMAT0004591	ACSL5	51703	NM_016234	0	0	0	0	0	0	0	0	0	0	1	0	1
hsa-miR-124-5p	MIMAT0004591	ACSL6	23305	XM_005271939	0	1	0	0	0	1	0	0	0	0	1	1	4
hsa-miR-124-5p	MIMAT0004591	ACSL6	23305	XM_005271940	0	0	0	0	0	1	0	0	0	0	1	1	3
hsa-miR-124-5p	MIMAT0004591	ACSL6	23305	NM_001205251	0	0	0	0	0	1	0	0	0	0	1	1	3
hsa-miR-124-5p	MIMAT0004591	ACSL6	23305	NM_001205247	0	0	0	0	0	1	0	0	0	0	1	1	3
hsa-miR-124-5p	MIMAT0004591	ACSL6	23305	NM_001205248	0	0	0	0	0	1	0	0	0	0	1	1	3
hsa-miR-124-5p	MIMAT0004591	ACSL6	23305	NM_001205250	0	0	0	0	0	1	0	0	0	0	1	1	3
hsa-miR-124-5p	MIMAT0004591	ACSL6	23305	NM_001009185	0	0	0	0	0	1	0	0	0	0	1	1	3
hsa-miR-124-5p	MIMAT0004591	ACSL6	23305	NM_015256	0	0	0	0	0	1	0	0	0	0	1	1	3
hsa-miR-124-5p	MIMAT0004591	ACSL6	23305	XM_005271941	0	0	0	0	0	1	0	0	0	0	1	0	2
hsa-miR-124-5p	MIMAT0004591	ACSM1	116285	XM_005255084	0	1	0	0	0	0	0	0	0	0	1	0	2
hsa-miR-124-5p	MIMAT0004591	ACSM1	116285	XM_005255086	0	0	0	0	0	0	0	0	0	0	1	0	1
hsa-miR-124-5p	MIMAT0004591	ACSM1	116285	XM_005255085	0	0	0	0	0	0	0	0	0	0	1	0	1
hsa-miR-124-5p	MIMAT0004591	ACSM1	116285	NM_052956	0	0	0	0	0	0	0	0	0	0	1	0	1
hsa-miR-124-5p	MIMAT0004591	ACSM2A	123876	NM_001010845	0	0	0	0	0	1	0	0	0	0	1	1	3
hsa-miR-124-5p	MIMAT0004591	ACSM2A	123876	XM_005255095	0	0	0	0	0	1	0	0	0	0	1	1	3
hsa-miR-124-5p	MIMAT0004591	ACSM2A	123876	XM_005255094	0	0	0	0	0	1	0	0	0	0	1	1	3
hsa-miR-124-5p	MIMAT0004591	ACSM2A	123876	XM_005255093	0	0	0	0	0	1	0	0	0	0	1	1	3
hsa-miR-124-5p	MIMAT0004591	ACSM2B	348158	NM_182617	0	0	0	0	0	1	0	0	0	0	1	1	3
hsa-miR-124-5p	MIMAT0004591	ACSM2B	348158	NM_001105069	0	0	0	0	0	1	0	0	0	0	1	1	3
hsa-miR-124-5p	MIMAT0004591	ACSM2B	348158	XM_005255304	0	0	0	0	0	1	0	0	0	0	1	0	2
hsa-miR-124-5p	MIMAT0004591	ACSM5	54988	NM_017888	0	0	0	0	0	0	0	0	0	0	1	0	1
hsa-miR-124-5p	MIMAT0004591	ACSM5	54988	XM_005255412	0	0	0	0	0	0	0	0	0	0	1	0	1
hsa-miR-124-5p	MIMAT0004591	ACSS1	84532	NM_032501	0	0	0	0	0	0	0	0	0	1	1	0	2
hsa-miR-124-5p	MIMAT0004591	ACSS1	84532	NM_001252677	0	0	0	0	0	0	0	0	0	0	1	0	1
hsa-miR-124-5p	MIMAT0004591	ACSS1	84532	NM_001252676	0	0	0	0	0	0	0	0	0	0	1	0	1
hsa-miR-124-5p	MIMAT0004591	ACSS1	84532	NM_001252675	0	0	0	0	0	0	0	0	0	0	1	0	1
hsa-miR-124-5p	MIMAT0004591	ACSS2	55902	XM_005260455	0	0	0	0	0	0	0	0	0	0	1	0	1
hsa-miR-124-5p	MIMAT0004591	ACSS2	55902	XM_005260457	0	0	0	0	0	0	0	0	0	0	1	0	1
hsa-miR-124-5p	MIMAT0004591	ACSS2	55902	NM_001242393	0	0	0	0	0	0	0	0	0	0	1	0	1
hsa-miR-124-5p	MIMAT0004591	ACSS2	55902	NM_018677	0	0	0	0	0	0	0	0	0	0	1	0	1
hsa-miR-124-5p	MIMAT0004591	ACSS2	55902	XM_005260456	0	0	0	0	0	0	0	0	0	0	1	0	1
hsa-miR-124-5p	MIMAT0004591	ACSS2	55902	XM_005260454	0	0	0	0	0	0	0	0	0	0	1	0	1
hsa-miR-124-5p	MIMAT0004591	ACSS2	55902	NM_001076552	0	0	0	0	0	0	0	0	0	0	1	0	1
hsa-miR-124-5p	MIMAT0004591	ACSS3	79611	XM_005269150	0	0	0	0	0	1	0	0	0	1	1	0	3
hsa-miR-124-5p	MIMAT0004591	ACSS3	79611	NM_024560	0	0	0	0	0	1	0	0	0	0	1	0	2
hsa-miR-124-5p	MIMAT0004591	ACSS3	79611	XM_005269151	0	0	0	0	0	1	0	0	0	0	0	0	1
hsa-miR-124-5p	MIMAT0004591	ACTA2	59	NM_001141945	1	0	0	0	0	0	0	0	0	0	1	0	2
hsa-miR-124-5p	MIMAT0004591	ACTA2	59	NM_001613	1	0	0	0	0	0	0	0	0	0	1	0	2
hsa-miR-124-5p	MIMAT0004591	ACTB	60	XM_005249818	0	0	0	0	0	0	0	0	0	0	1	0	1
hsa-miR-124-5p	MIMAT0004591	ACTB	60	XM_005249819	0	0	0	0	0	0	0	0	0	0	1	0	1
hsa-miR-124-5p	MIMAT0004591	ACTB	60	NM_001101	0	0	0	0	0	0	0	0	0	0	1	0	1
hsa-miR-124-5p	MIMAT0004591	ACTB	60	XM_005249820	0	0	0	0	0	0	0	0	0	0	1	0	1
hsa-miR-124-5p	MIMAT0004591	ACTBL2	345651	NM_001017992	0	0	0	0	0	0	0	0	0	0	1	0	1
hsa-miR-124-5p	MIMAT0004591	ACTC1	70	NM_005159	1	0	1	0	0	1	0	0	0	0	1	1	5
hsa-miR-124-5p	MIMAT0004591	ACTG1	71	NM_001199954	0	1	0	0	0	1	0	0	0	1	1	0	4
hsa-miR-124-5p	MIMAT0004591	ACTG1	71	NM_001614	0	0	0	0	0	1	0	0	0	0	1	0	2
hsa-miR-124-5p	MIMAT0004591	ACTL10	170487	NM_001024675	0	0	0	0	0	0	0	0	0	0	1	0	1
hsa-miR-124-5p	MIMAT0004591	ACTL6A	86	NM_178042	0	0	0	0	0	0	0	0	0	0	1	0	1
hsa-miR-124-5p	MIMAT0004591	ACTL6A	86	NM_177989	0	0	0	0	0	0	0	0	0	0	1	0	1
hsa-miR-124-5p	MIMAT0004591	ACTL6A	86	NM_004301	0	0	0	0	0	0	0	0	0	0	1	0	1
hsa-miR-124-5p	MIMAT0004591	ACTL7A	10881	NM_006687	0	0	0	0	0	0	0	0	0	0	1	0	1
hsa-miR-124-5p	MIMAT0004591	ACTL8	81569	NM_030812	0	0	0	0	0	0	0	0	0	0	1	0	1
hsa-miR-124-5p	MIMAT0004591	ACTL9	284382	NM_178525	0	0	0	0	0	0	0	0	0	0	1	0	1
hsa-miR-124-5p	MIMAT0004591	ACTN1	87	NM_001130004	0	0	0	0	0	0	0	0	0	0	1	0	1
hsa-miR-124-5p	MIMAT0004591	ACTN1	87	NM_001130005	0	0	0	0	0	0	0	0	0	0	1	0	1
hsa-miR-124-5p	MIMAT0004591	ACTN1	87	NM_001102	0	0	0	0	0	0	0	0	0	0	1	0	1
hsa-miR-124-5p	MIMAT0004591	ACTN1	87	XM_005268150	0	0	0	0	0	0	0	0	0	0	1	0	1
hsa-miR-124-5p	MIMAT0004591	ACTN2	88	XM_005273339	0	0	0	0	0	0	0	0	0	0	1	0	1
hsa-miR-124-5p	MIMAT0004591	ACTN2	88	NM_001278344	0	0	0	0	0	0	0	0	0	0	1	0	1
hsa-miR-124-5p	MIMAT0004591	ACTN2	88	NM_001103	0	0	0	0	0	0	0	0	0	0	1	0	1
hsa-miR-124-5p	MIMAT0004591	ACTN2	88	NM_001278343	0	0	0	0	0	0	0	0	0	0	1	0	1
hsa-miR-124-5p	MIMAT0004591	ACTN3	89	NM_001258371	0	0	0	0	0	0	0	0	0	0	1	0	1
hsa-miR-124-5p	MIMAT0004591	ACTN3	89	NM_001104	0	0	0	0	0	0	0	0	0	0	1	0	1
hsa-miR-124-5p	MIMAT0004591	ACTN4	81	XM_005259281	0	0	0	0	0	0	0	0	0	0	1	0	1
hsa-miR-124-5p	MIMAT0004591	ACTN4	81	XM_005259282	0	0	0	0	0	0	0	0	0	0	1	0	1
hsa-miR-124-5p	MIMAT0004591	ACTN4	81	XM_005259283	0	0	0	0	0	0	0	0	0	0	1	0	1
hsa-miR-124-5p	MIMAT0004591	ACTN4	81	NM_004924	0	0	0	0	0	0	0	0	0	0	1	0	1
hsa-miR-124-5p	MIMAT0004591	ACTR10	55860	NM_018477	0	0	0	0	0	0	0	0	0	0	1	0	1
hsa-miR-124-5p	MIMAT0004591	ACTR1A	10121	NM_005736	0	0	0	0	0	0	0	0	0	1	1	0	2
hsa-miR-124-5p	MIMAT0004591	ACTR1A	10121	XM_005269381	0	0	0	0	0	0	0	0	0	0	1	0	1
hsa-miR-124-5p	MIMAT0004591	ACTR1B	10120	NM_005735	0	0	0	0	0	0	0	0	0	0	1	0	1
hsa-miR-124-5p	MIMAT0004591	ACTR1B	10120	XM_005263854	0	0	0	0	0	0	0	0	0	0	1	0	1
hsa-miR-124-5p	MIMAT0004591	ACTR2	10097	XM_005264080	1	0	0	0	0	0	0	0	0	1	1	0	3
hsa-miR-124-5p	MIMAT0004591	ACTR2	10097	NM_005722	1	0	0	0	0	0	0	0	0	0	1	0	2
hsa-miR-124-5p	MIMAT0004591	ACTR2	10097	NM_001005386	1	0	0	0	0	0	0	0	0	0	1	0	2
hsa-miR-124-5p	MIMAT0004591	ACTR3	10096	NM_005721	1	1	1	0	0	1	0	0	0	0	1	1	6
hsa-miR-124-5p	MIMAT0004591	ACTR3	10096	NM_001277140	1	0	1	0	0	1	0	0	0	0	1	1	5
hsa-miR-124-5p	MIMAT0004591	ACTR3B	57180	NM_020445	0	1	1	0	0	1	0	0	0	0	1	1	5
hsa-miR-124-5p	MIMAT0004591	ACTR3B	57180	NM_001040135	0	0	1	0	0	1	0	0	0	0	1	1	4
hsa-miR-124-5p	MIMAT0004591	ACTR3C	653857	XM_005250043	0	0	0	0	0	1	0	0	0	0	1	0	2
hsa-miR-124-5p	MIMAT0004591	ACTR3C	653857	NM_001164458	0	0	0	0	0	1	0	0	0	0	0	0	1
hsa-miR-124-5p	MIMAT0004591	ACTR3C	653857	NM_001164459	0	0	0	0	0	1	0	0	0	0	0	0	1
hsa-miR-124-5p	MIMAT0004591	ACTR5	79913	NM_024855	0	0	0	0	0	0	0	0	0	0	1	0	1
hsa-miR-124-5p	MIMAT0004591	ACTR5	79913	XM_005260557	0	0	0	0	0	0	0	0	0	0	1	0	1
hsa-miR-124-5p	MIMAT0004591	ACTR5	79913	XM_005260556	0	0	0	0	0	0	0	0	0	0	1	0	1
hsa-miR-124-5p	MIMAT0004591	ACTR5	79913	XM_005260555	0	0	0	0	0	0	0	0	0	0	1	0	1
hsa-miR-124-5p	MIMAT0004591	ACTR5	79913	XM_005260554	0	0	0	0	0	0	0	0	0	0	1	0	1
hsa-miR-124-5p	MIMAT0004591	ACTR6	64431	NM_022496	0	0	0	0	0	0	0	0	0	0	1	0	1
hsa-miR-124-5p	MIMAT0004591	ACTR8	93973	NM_022899	0	0	0	0	0	1	0	0	0	0	1	1	3
hsa-miR-124-5p	MIMAT0004591	ACTR8	93973	XM_005265587	0	0	0	0	0	1	0	0	0	0	0	0	1
hsa-miR-124-5p	MIMAT0004591	ACTRT1	139741	NM_138289	0	0	0	0	0	0	0	0	0	0	1	0	1
hsa-miR-124-5p	MIMAT0004591	ACTRT2	140625	NM_080431	0	0	0	0	0	0	0	0	0	0	1	0	1
hsa-miR-124-5p	MIMAT0004591	ACTRT3	84517	NM_032487	0	0	0	0	0	0	0	0	0	0	1	0	1
hsa-miR-124-5p	MIMAT0004591	ACVR1	90	NM_001105	1	1	0	0	0	1	0	0	0	0	1	1	5
hsa-miR-124-5p	MIMAT0004591	ACVR1	90	NM_001111067	1	0	0	0	0	1	0	0	0	0	1	1	4
hsa-miR-124-5p	MIMAT0004591	ACVR1	90	XM_005246940	1	0	0	0	0	1	0	0	0	0	1	1	4
hsa-miR-124-5p	MIMAT0004591	ACVR1	90	XM_005246939	1	0	0	0	0	1	0	0	0	0	1	1	4
hsa-miR-124-5p	MIMAT0004591	ACVR1B	91	NM_020328	0	0	0	0	0	0	0	0	0	1	1	0	2
hsa-miR-124-5p	MIMAT0004591	ACVR1B	91	NM_020327	0	0	0	0	0	0	0	0	0	0	1	0	1
hsa-miR-124-5p	MIMAT0004591	ACVR1B	91	NM_004302	0	0	0	0	0	0	0	0	0	0	1	0	1
hsa-miR-124-5p	MIMAT0004591	ACVR1C	130399	NM_145259	0	1	1	0	0	1	0	0	0	0	1	1	5
hsa-miR-124-5p	MIMAT0004591	ACVR1C	130399	NM_001111033	0	0	1	0	0	1	0	0	0	0	1	1	4
hsa-miR-124-5p	MIMAT0004591	ACVR1C	130399	NM_001111032	0	0	1	0	0	1	0	0	0	0	1	1	4
hsa-miR-124-5p	MIMAT0004591	ACVR1C	130399	NM_001111031	0	0	1	0	0	1	0	0	0	0	1	1	4
hsa-miR-124-5p	MIMAT0004591	ACVR2A	92	NM_001278579	1	0	0	0	0	0	0	0	0	1	1	0	3
hsa-miR-124-5p	MIMAT0004591	ACVR2A	92	NM_001278580	1	0	0	0	0	0	0	0	0	0	1	0	2
hsa-miR-124-5p	MIMAT0004591	ACVR2A	92	NM_001616	1	0	0	0	0	0	0	0	0	0	1	0	2
hsa-miR-124-5p	MIMAT0004591	ACVR2A	92	XM_005263843	0	0	0	0	0	0	0	0	0	0	1	0	1
hsa-miR-124-5p	MIMAT0004591	ACVR2B	93	XM_005265583	0	0	1	0	0	0	0	0	0	0	1	1	3
hsa-miR-124-5p	MIMAT0004591	ACVR2B	93	NM_001106	0	0	1	0	0	0	0	0	0	0	1	1	3
hsa-miR-124-5p	MIMAT0004591	ACVRL1	94	XM_005269235	0	0	0	0	0	0	0	0	0	1	1	0	2
hsa-miR-124-5p	MIMAT0004591	ACVRL1	94	XM_005269236	0	0	0	0	0	0	0	0	0	0	1	0	1
hsa-miR-124-5p	MIMAT0004591	ACVRL1	94	NM_001077401	0	0	0	0	0	0	0	0	0	0	1	0	1
hsa-miR-124-5p	MIMAT0004591	ACVRL1	94	NM_000020	0	0	0	0	0	0	0	0	0	0	1	0	1
hsa-miR-124-5p	MIMAT0004591	ACY3	91703	NM_080658	0	0	0	0	0	0	0	0	0	0	1	0	1
hsa-miR-124-5p	MIMAT0004591	ACYP1	97	XM_005268240	0	0	0	0	0	1	0	0	0	0	1	0	2
hsa-miR-124-5p	MIMAT0004591	ACYP1	97	NM_001107	0	0	0	0	0	1	0	0	0	0	1	0	2
hsa-miR-124-5p	MIMAT0004591	ACYP1	97	NM_203488	0	0	0	0	0	1	0	0	0	0	1	0	2
hsa-miR-124-5p	MIMAT0004591	ACYP1	97	XM_005268239	0	0	0	0	0	1	0	0	0	0	1	0	2
hsa-miR-124-5p	MIMAT0004591	ACYP2	98	NM_138448	1	0	0	0	0	1	0	0	0	0	1	0	3
hsa-miR-124-5p	MIMAT0004591	ADA	100	NM_000022	0	0	0	0	0	0	0	0	0	0	1	0	1
hsa-miR-124-5p	MIMAT0004591	ADA	100	XM_005260237	0	0	0	0	0	0	0	0	0	0	1	0	1
hsa-miR-124-5p	MIMAT0004591	ADA	100	XM_005260238	0	0	0	0	0	0	0	0	0	0	1	0	1
hsa-miR-124-5p	MIMAT0004591	ADA	100	XM_005260236	0	0	0	0	0	0	0	0	0	0	1	0	1
hsa-miR-124-5p	MIMAT0004591	ADAD2	161931	NM_139174	0	0	0	0	0	0	0	0	0	1	1	0	2
hsa-miR-124-5p	MIMAT0004591	ADAD2	161931	NM_001145400	0	0	0	0	0	0	0	0	0	0	1	0	1
hsa-miR-124-5p	MIMAT0004591	ADAD2	161931	XM_005255814	0	0	0	0	0	0	0	0	0	0	1	0	1
hsa-miR-124-5p	MIMAT0004591	ADAL	161823	NM_001159280	0	0	0	0	0	0	0	0	0	1	1	0	2
hsa-miR-124-5p	MIMAT0004591	ADAL	161823	XM_005254206	0	0	0	0	0	0	0	0	0	0	1	0	1
hsa-miR-124-5p	MIMAT0004591	ADAL	161823	XM_005254205	0	0	0	0	0	0	0	0	0	0	1	0	1
hsa-miR-124-5p	MIMAT0004591	ADAL	161823	NM_001012969	0	0	0	0	0	0	0	0	0	0	1	0	1
hsa-miR-124-5p	MIMAT0004591	ADAL	161823	XM_005254204	0	0	0	0	0	0	0	0	0	0	1	0	1
hsa-miR-124-5p	MIMAT0004591	ADAM10	102	XM_005254117	0	1	0	0	0	1	0	0	0	0	1	1	4
hsa-miR-124-5p	MIMAT0004591	ADAM10	102	NM_001110	0	0	0	0	0	1	0	0	0	0	1	1	3
hsa-miR-124-5p	MIMAT0004591	ADAM10	102	XM_005254118	0	0	0	0	0	1	0	0	0	0	1	1	3
hsa-miR-124-5p	MIMAT0004591	ADAM11	4185	XM_005257373	0	0	0	0	0	0	0	0	0	1	1	0	2
hsa-miR-124-5p	MIMAT0004591	ADAM11	4185	NM_002390	0	0	0	0	0	0	0	0	0	0	1	0	1
hsa-miR-124-5p	MIMAT0004591	ADAM11	4185	XM_005257374	0	0	0	0	0	0	0	0	0	0	1	0	1
hsa-miR-124-5p	MIMAT0004591	ADAM11	4185	XM_005257375	0	0	0	0	0	0	0	0	0	0	1	0	1
hsa-miR-124-5p	MIMAT0004591	ADAM12	8038	XM_005270188	1	1	0	0	0	1	0	0	0	0	1	0	4
hsa-miR-124-5p	MIMAT0004591	ADAM12	8038	NM_003474	1	0	0	0	0	1	0	0	0	0	1	0	3
hsa-miR-124-5p	MIMAT0004591	ADAM12	8038	XM_005270190	0	0	0	0	0	1	0	0	0	0	1	0	2
hsa-miR-124-5p	MIMAT0004591	ADAM12	8038	XM_005270189	0	0	0	0	0	1	0	0	0	0	1	0	2
hsa-miR-124-5p	MIMAT0004591	ADAM12	8038	NM_021641	0	0	0	0	0	1	0	0	0	0	1	0	2
hsa-miR-124-5p	MIMAT0004591	ADAM15	8751	NM_207197	0	0	0	0	0	0	0	0	0	0	1	0	1
hsa-miR-124-5p	MIMAT0004591	ADAM15	8751	NM_001261466	0	0	0	0	0	0	0	0	0	0	1	0	1
hsa-miR-124-5p	MIMAT0004591	ADAM15	8751	NM_207191	0	0	0	0	0	0	0	0	0	0	1	0	1
hsa-miR-124-5p	MIMAT0004591	ADAM15	8751	NM_003815	0	0	0	0	0	0	0	0	0	0	1	0	1
hsa-miR-124-5p	MIMAT0004591	ADAM15	8751	NM_001261465	0	0	0	0	0	0	0	0	0	0	1	0	1
hsa-miR-124-5p	MIMAT0004591	ADAM15	8751	NM_001261464	0	0	0	0	0	0	0	0	0	0	1	0	1
hsa-miR-124-5p	MIMAT0004591	ADAM15	8751	NM_207195	0	0	0	0	0	0	0	0	0	0	1	0	1
hsa-miR-124-5p	MIMAT0004591	ADAM15	8751	NM_207194	0	0	0	0	0	0	0	0	0	0	1	0	1
hsa-miR-124-5p	MIMAT0004591	ADAM15	8751	NM_207196	0	0	0	0	0	0	0	0	0	0	1	0	1
hsa-miR-124-5p	MIMAT0004591	ADAM17	6868	NM_003183	0	0	0	0	0	0	0	0	0	0	1	0	1
hsa-miR-124-5p	MIMAT0004591	ADAM18	8749	NM_014237	0	0	0	0	0	0	0	0	0	0	1	0	1
hsa-miR-124-5p	MIMAT0004591	ADAM18	8749	NM_001190956	0	0	0	0	0	0	0	0	0	0	1	0	1
hsa-miR-124-5p	MIMAT0004591	ADAM18	8749	XM_005273667	0	0	0	0	0	0	0	0	0	0	1	0	1
hsa-miR-124-5p	MIMAT0004591	ADAM19	8728	NM_033274	1	0	0	0	0	0	0	0	0	1	1	0	3
hsa-miR-124-5p	MIMAT0004591	ADAM19	8728	XM_005266004	1	0	0	0	0	0	0	0	0	0	1	0	2
hsa-miR-124-5p	MIMAT0004591	ADAM19	8728	XM_005266005	0	0	0	0	0	0	0	0	0	0	1	0	1
hsa-miR-124-5p	MIMAT0004591	ADAM2	2515	NM_001464	0	0	0	0	0	0	0	0	0	0	1	0	1
hsa-miR-124-5p	MIMAT0004591	ADAM2	2515	XM_005273469	0	0	0	0	0	0	0	0	0	0	1	0	1
hsa-miR-124-5p	MIMAT0004591	ADAM2	2515	NM_001278114	0	0	0	0	0	0	0	0	0	0	1	0	1
hsa-miR-124-5p	MIMAT0004591	ADAM2	2515	XM_005273468	0	0	0	0	0	0	0	0	0	0	1	0	1
hsa-miR-124-5p	MIMAT0004591	ADAM2	2515	NM_001278113	0	0	0	0	0	0	0	0	0	0	1	0	1
hsa-miR-124-5p	MIMAT0004591	ADAM20	8748	XM_005268151	0	0	0	0	0	0	0	0	0	0	1	0	1
hsa-miR-124-5p	MIMAT0004591	ADAM20	8748	XM_005268152	0	0	0	0	0	0	0	0	0	0	1	0	1
hsa-miR-124-5p	MIMAT0004591	ADAM20	8748	NM_003814	0	0	0	0	0	0	0	0	0	0	1	0	1
hsa-miR-124-5p	MIMAT0004591	ADAM21	8747	NM_003813	0	0	0	0	0	0	0	0	0	0	1	0	1
hsa-miR-124-5p	MIMAT0004591	ADAM22	53616	XM_005250444	1	0	0	0	0	0	0	0	0	1	1	0	3
hsa-miR-124-5p	MIMAT0004591	ADAM22	53616	NM_016351	1	0	0	0	0	0	0	0	0	0	1	0	2
hsa-miR-124-5p	MIMAT0004591	ADAM22	53616	XM_005250445	1	0	0	0	0	0	0	0	0	0	1	0	2
hsa-miR-124-5p	MIMAT0004591	ADAM22	53616	NM_021722	1	0	0	0	0	0	0	0	0	0	1	0	2
hsa-miR-124-5p	MIMAT0004591	ADAM22	53616	NM_021723	1	0	0	0	0	0	0	0	0	0	1	0	2
hsa-miR-124-5p	MIMAT0004591	ADAM23	8745	NM_003812	0	1	1	0	0	1	0	0	0	1	1	1	6
hsa-miR-124-5p	MIMAT0004591	ADAM23	8745	XM_005246932	0	0	1	0	0	1	0	0	0	0	1	1	4
hsa-miR-124-5p	MIMAT0004591	ADAM28	10863	NM_014265	0	0	0	0	0	0	0	0	0	1	1	0	2
hsa-miR-124-5p	MIMAT0004591	ADAM28	10863	NM_021777	0	0	0	0	0	0	0	0	0	0	1	0	1
hsa-miR-124-5p	MIMAT0004591	ADAM28	10863	XM_005273383	0	0	0	0	0	0	0	0	0	0	1	0	1
hsa-miR-124-5p	MIMAT0004591	ADAM28	10863	XM_005273381	0	0	0	0	0	0	0	0	0	0	1	0	1
hsa-miR-124-5p	MIMAT0004591	ADAM28	10863	XM_005273379	0	0	0	0	0	0	0	0	0	0	1	0	1
hsa-miR-124-5p	MIMAT0004591	ADAM28	10863	XM_005273378	0	0	0	0	0	0	0	0	0	0	1	0	1
hsa-miR-124-5p	MIMAT0004591	ADAM28	10863	XM_005273380	0	0	0	0	0	0	0	0	0	0	1	0	1
hsa-miR-124-5p	MIMAT0004591	ADAM30	11085	NM_021794	1	0	0	0	0	0	0	0	0	0	1	0	2
hsa-miR-124-5p	MIMAT0004591	ADAM32	203102	NM_145004	0	0	0	0	0	0	0	0	0	1	1	0	2
hsa-miR-124-5p	MIMAT0004591	ADAM32	203102	XM_005273429	0	0	0	0	0	0	0	0	0	0	1	0	1
hsa-miR-124-5p	MIMAT0004591	ADAM33	80332	XM_005260837	0	0	0	0	0	1	0	0	0	1	1	0	3
hsa-miR-124-5p	MIMAT0004591	ADAM33	80332	XM_005260849	0	0	0	0	0	1	0	0	0	0	1	0	2
hsa-miR-124-5p	MIMAT0004591	ADAM33	80332	XM_005260850	0	0	0	0	0	1	0	0	0	0	1	0	2
hsa-miR-124-5p	MIMAT0004591	ADAM33	80332	XM_005260851	0	0	0	0	0	1	0	0	0	0	1	0	2
hsa-miR-124-5p	MIMAT0004591	ADAM33	80332	XM_005260847	0	0	0	0	0	1	0	0	0	0	1	0	2
hsa-miR-124-5p	MIMAT0004591	ADAM33	80332	XM_005260846	0	0	0	0	0	1	0	0	0	0	1	0	2
hsa-miR-124-5p	MIMAT0004591	ADAM33	80332	XM_005260844	0	0	0	0	0	1	0	0	0	0	1	0	2
hsa-miR-124-5p	MIMAT0004591	ADAM33	80332	NM_153202	0	0	0	0	0	1	0	0	0	0	1	0	2
hsa-miR-124-5p	MIMAT0004591	ADAM33	80332	XM_005260848	0	0	0	0	0	1	0	0	0	0	1	0	2
hsa-miR-124-5p	MIMAT0004591	ADAM33	80332	NM_025220	0	0	0	0	0	1	0	0	0	0	1	0	2
hsa-miR-124-5p	MIMAT0004591	ADAM33	80332	XM_005260843	0	0	0	0	0	1	0	0	0	0	1	0	2
hsa-miR-124-5p	MIMAT0004591	ADAM33	80332	XM_005260842	0	0	0	0	0	1	0	0	0	0	1	0	2
hsa-miR-124-5p	MIMAT0004591	ADAM33	80332	XM_005260840	0	0	0	0	0	1	0	0	0	0	1	0	2
hsa-miR-124-5p	MIMAT0004591	ADAM33	80332	XM_005260839	0	0	0	0	0	1	0	0	0	0	1	0	2
hsa-miR-124-5p	MIMAT0004591	ADAM33	80332	XM_005260841	0	0	0	0	0	1	0	0	0	0	1	0	2
hsa-miR-124-5p	MIMAT0004591	ADAM33	80332	XM_005260838	0	0	0	0	0	1	0	0	0	0	1	0	2
hsa-miR-124-5p	MIMAT0004591	ADAM7	8756	XM_005273668	1	0	0	0	0	0	0	0	0	1	1	0	3
hsa-miR-124-5p	MIMAT0004591	ADAM7	8756	XM_005273672	1	0	0	0	0	0	0	0	0	0	1	0	2
hsa-miR-124-5p	MIMAT0004591	ADAM7	8756	XM_005273671	1	0	0	0	0	0	0	0	0	0	1	0	2
hsa-miR-124-5p	MIMAT0004591	ADAM7	8756	NM_003817	1	0	0	0	0	0	0	0	0	0	1	0	2
hsa-miR-124-5p	MIMAT0004591	ADAM7	8756	XM_005273669	1	0	0	0	0	0	0	0	0	0	1	0	2
hsa-miR-124-5p	MIMAT0004591	ADAM7	8756	XM_005273670	0	0	0	0	0	0	0	0	0	0	1	0	1
hsa-miR-124-5p	MIMAT0004591	ADAM7	8756	XM_005273673	0	0	0	0	0	0	0	0	0	0	1	0	1
hsa-miR-124-5p	MIMAT0004591	ADAM8	101	NM_001109	0	0	0	0	0	0	0	0	0	0	1	0	1
hsa-miR-124-5p	MIMAT0004591	ADAM8	101	XM_005252656	0	0	0	0	0	0	0	0	0	0	1	0	1
hsa-miR-124-5p	MIMAT0004591	ADAM8	101	NM_001164490	0	0	0	0	0	0	0	0	0	0	1	0	1
hsa-miR-124-5p	MIMAT0004591	ADAM8	101	NM_001164489	0	0	0	0	0	0	0	0	0	0	1	0	1
hsa-miR-124-5p	MIMAT0004591	ADAM8	101	XM_005252655	0	0	0	0	0	0	0	0	0	0	1	0	1
hsa-miR-124-5p	MIMAT0004591	ADAM9	8754	NM_003816	0	0	0	0	0	0	0	0	0	1	1	0	2
hsa-miR-124-5p	MIMAT0004591	ADAMDEC1	27299	NM_001145271	0	1	0	0	0	0	0	0	0	0	0	0	1
hsa-miR-124-5p	MIMAT0004591	ADAMTS1	9510	NM_006988	0	1	0	0	0	1	0	0	0	0	1	0	3
hsa-miR-124-5p	MIMAT0004591	ADAMTS10	81794	NM_030957	0	0	0	0	0	0	0	0	0	0	1	0	1
hsa-miR-124-5p	MIMAT0004591	ADAMTS10	81794	XM_005272500	0	0	0	0	0	0	0	0	0	0	1	0	1
hsa-miR-124-5p	MIMAT0004591	ADAMTS10	81794	XM_005277798	0	0	0	0	0	0	0	0	0	0	1	0	1
hsa-miR-124-5p	MIMAT0004591	ADAMTS10	81794	XM_005272499	0	0	0	0	0	0	0	0	0	0	1	0	1
hsa-miR-124-5p	MIMAT0004591	ADAMTS10	81794	XM_005277797	0	0	0	0	0	0	0	0	0	0	1	0	1
hsa-miR-124-5p	MIMAT0004591	ADAMTS10	81794	XM_005272498	0	0	0	0	0	0	0	0	0	0	1	0	1
hsa-miR-124-5p	MIMAT0004591	ADAMTS10	81794	XM_005277796	0	0	0	0	0	0	0	0	0	0	1	0	1
hsa-miR-124-5p	MIMAT0004591	ADAMTS12	81792	XM_005248381	0	1	0	0	0	1	0	0	0	1	1	1	5
hsa-miR-124-5p	MIMAT0004591	ADAMTS12	81792	NM_030955	0	0	0	0	0	1	0	0	0	0	0	0	1
hsa-miR-124-5p	MIMAT0004591	ADAMTS13	11093	NM_139025	0	0	0	0	0	0	0	0	0	1	1	0	2
hsa-miR-124-5p	MIMAT0004591	ADAMTS13	11093	NM_139026	0	0	0	0	0	0	0	0	0	0	1	0	1
hsa-miR-124-5p	MIMAT0004591	ADAMTS13	11093	NM_139027	0	0	0	0	0	0	0	0	0	0	1	0	1
hsa-miR-124-5p	MIMAT0004591	ADAMTS14	140766	NM_139155	1	0	0	0	0	1	0	0	0	1	1	1	5
hsa-miR-124-5p	MIMAT0004591	ADAMTS14	140766	NM_080722	1	0	0	0	0	1	0	0	0	0	1	1	4
hsa-miR-124-5p	MIMAT0004591	ADAMTS15	170689	NM_139055	0	0	0	0	0	0	0	0	0	1	1	0	2
hsa-miR-124-5p	MIMAT0004591	ADAMTS15	170689	XM_005271419	0	0	0	0	0	0	0	0	0	0	1	0	1
hsa-miR-124-5p	MIMAT0004591	ADAMTS16	170690	NM_139056	0	0	0	0	0	0	0	0	0	1	1	0	2
hsa-miR-124-5p	MIMAT0004591	ADAMTS17	170691	XM_005254872	0	0	0	0	0	0	0	0	0	0	1	0	1
hsa-miR-124-5p	MIMAT0004591	ADAMTS17	170691	NM_139057	0	0	0	0	0	0	0	0	0	0	1	0	1
hsa-miR-124-5p	MIMAT0004591	ADAMTS18	170692	NM_199355	1	0	1	0	0	1	0	0	0	1	1	1	6
hsa-miR-124-5p	MIMAT0004591	ADAMTS19	171019	NM_133638	0	1	1	0	0	1	0	1	0	1	1	1	7
hsa-miR-124-5p	MIMAT0004591	ADAMTS2	9509	NM_014244	1	1	0	0	0	1	0	0	0	1	1	0	5
hsa-miR-124-5p	MIMAT0004591	ADAMTS2	9509	NM_021599	0	0	0	0	0	1	0	0	0	0	1	0	2
hsa-miR-124-5p	MIMAT0004591	ADAMTS20	80070	NM_025003	0	1	0	0	0	1	0	0	0	0	0	0	2
hsa-miR-124-5p	MIMAT0004591	ADAMTS3	9508	NM_014243	0	0	0	0	0	0	0	0	0	1	1	0	2
hsa-miR-124-5p	MIMAT0004591	ADAMTS4	9507	NM_005099	0	0	0	0	0	0	0	0	0	1	1	0	2
hsa-miR-124-5p	MIMAT0004591	ADAMTS5	11096	NM_007038	1	0	0	0	0	0	0	0	0	1	1	0	3
hsa-miR-124-5p	MIMAT0004591	ADAMTS6	11174	NM_197941	1	1	1	0	0	1	0	0	0	0	1	1	6
hsa-miR-124-5p	MIMAT0004591	ADAMTS7	11173	NM_014272	0	0	0	0	0	0	0	0	0	0	1	0	1
hsa-miR-124-5p	MIMAT0004591	ADAMTS8	11095	NM_007037	0	0	0	0	0	0	0	0	0	0	1	0	1
hsa-miR-124-5p	MIMAT0004591	ADAMTS9	56999	XM_005265329	0	0	0	0	0	0	0	0	0	1	1	0	2
hsa-miR-124-5p	MIMAT0004591	ADAMTS9	56999	NM_182920	0	0	0	0	0	0	0	0	0	0	1	0	1
hsa-miR-124-5p	MIMAT0004591	ADAMTSL1	92949	NM_001040272	0	0	0	0	0	0	0	0	0	1	1	0	2
hsa-miR-124-5p	MIMAT0004591	ADAMTSL2	9719	NM_001145320	0	0	0	0	0	0	0	0	0	0	1	0	1
hsa-miR-124-5p	MIMAT0004591	ADAMTSL2	9719	XM_005272238	0	0	0	0	0	0	0	0	0	0	1	0	1
hsa-miR-124-5p	MIMAT0004591	ADAMTSL2	9719	XM_005272239	0	0	0	0	0	0	0	0	0	0	1	0	1
hsa-miR-124-5p	MIMAT0004591	ADAMTSL2	9719	NM_014694	0	0	0	0	0	0	0	0	0	0	1	0	1
hsa-miR-124-5p	MIMAT0004591	ADAMTSL2	9719	XM_005272237	0	0	0	0	0	0	0	0	0	0	1	0	1
hsa-miR-124-5p	MIMAT0004591	ADAMTSL3	57188	NM_207517	0	0	0	0	0	1	0	0	0	1	1	0	3
hsa-miR-124-5p	MIMAT0004591	ADAMTSL3	57188	XM_005272438	0	0	0	0	0	1	0	0	0	0	1	0	2
hsa-miR-124-5p	MIMAT0004591	ADAMTSL3	57188	XM_005272437	0	0	0	0	0	1	0	0	0	0	1	0	2
hsa-miR-124-5p	MIMAT0004591	ADAMTSL3	57188	XM_005272435	0	0	0	0	0	1	0	0	0	0	1	0	2
hsa-miR-124-5p	MIMAT0004591	ADAMTSL3	57188	XM_005272436	0	0	0	0	0	1	0	0	0	0	0	0	1
hsa-miR-124-5p	MIMAT0004591	ADAMTSL4	54507	XM_005245269	0	0	0	0	0	0	0	0	0	0	1	0	1
hsa-miR-124-5p	MIMAT0004591	ADAMTSL4	54507	NM_019032	0	0	0	0	0	0	0	0	0	0	1	0	1
hsa-miR-124-5p	MIMAT0004591	ADAMTSL5	339366	NM_213604	0	0	0	0	0	0	0	0	0	0	1	0	1
hsa-miR-124-5p	MIMAT0004591	ADAMTSL5	339366	XM_005259549	0	0	0	0	0	0	0	0	0	0	1	0	1
hsa-miR-124-5p	MIMAT0004591	ADAP1	11033	NM_006869	0	0	0	0	0	0	0	0	0	1	1	0	2
hsa-miR-124-5p	MIMAT0004591	ADAP1	11033	XM_005249587	0	0	0	0	0	0	0	0	0	0	1	0	1
hsa-miR-124-5p	MIMAT0004591	ADAP2	55803	XM_005258010	1	1	1	0	0	1	0	0	0	0	1	1	6
hsa-miR-124-5p	MIMAT0004591	ADAP2	55803	NM_018404	1	0	1	0	0	1	0	0	0	0	1	1	5
hsa-miR-124-5p	MIMAT0004591	ADAP2	55803	XM_005258011	0	0	1	0	0	1	0	0	0	0	1	1	4
hsa-miR-124-5p	MIMAT0004591	ADAP2	55803	XM_005258009	0	0	1	0	0	1	0	0	0	0	1	1	4
hsa-miR-124-5p	MIMAT0004591	ADAP2	55803	XM_005258008	0	0	1	0	0	1	0	0	0	0	1	1	4
hsa-miR-124-5p	MIMAT0004591	ADAR	103	NM_001193495	0	1	0	0	0	1	0	0	0	1	1	1	5
hsa-miR-124-5p	MIMAT0004591	ADAR	103	NM_015841	0	0	0	0	0	1	0	0	0	0	1	1	3
hsa-miR-124-5p	MIMAT0004591	ADAR	103	NM_001025107	0	0	0	0	0	1	0	0	0	0	1	1	3
hsa-miR-124-5p	MIMAT0004591	ADAR	103	NM_015840	0	0	0	0	0	1	0	0	0	0	1	1	3
hsa-miR-124-5p	MIMAT0004591	ADAR	103	NM_001111	0	0	0	0	0	1	0	0	0	0	1	1	3
hsa-miR-124-5p	MIMAT0004591	ADARB1	104	NM_015833	0	0	0	0	0	1	0	0	0	1	1	0	3
hsa-miR-124-5p	MIMAT0004591	ADARB1	104	NM_001160230	0	0	0	0	0	1	0	0	0	0	1	0	2
hsa-miR-124-5p	MIMAT0004591	ADARB1	104	NM_015834	0	0	0	0	0	1	0	0	0	0	1	0	2
hsa-miR-124-5p	MIMAT0004591	ADARB1	104	NM_001112	0	0	0	0	0	1	0	0	0	0	1	0	2
hsa-miR-124-5p	MIMAT0004591	ADARB2	105	NM_018702	0	0	0	0	0	0	0	0	0	0	1	0	1
hsa-miR-124-5p	MIMAT0004591	ADAT1	23536	NM_012091	0	0	0	0	0	0	0	0	0	0	1	0	1
hsa-miR-124-5p	MIMAT0004591	ADAT1	23536	XM_005255878	0	0	0	0	0	0	0	0	0	0	1	0	1
hsa-miR-124-5p	MIMAT0004591	ADAT1	23536	XM_005255877	0	0	0	0	0	0	0	0	0	0	1	0	1
hsa-miR-124-5p	MIMAT0004591	ADAT1	23536	XM_005255875	0	0	0	0	0	0	0	0	0	0	1	0	1
hsa-miR-124-5p	MIMAT0004591	ADAT2	134637	NM_182503	0	0	1	0	0	0	0	0	0	0	1	1	3
hsa-miR-124-5p	MIMAT0004591	ADAT2	134637	XM_005266820	0	0	1	0	0	0	0	0	0	0	1	1	3
hsa-miR-124-5p	MIMAT0004591	ADAT2	134637	XM_005266821	0	0	1	0	0	0	0	0	0	0	1	1	3
hsa-miR-124-5p	MIMAT0004591	ADAT3	113179	XM_005259484	0	0	0	0	0	0	0	0	0	0	1	0	1
hsa-miR-124-5p	MIMAT0004591	ADAT3	113179	NM_138422	0	0	0	0	0	0	0	0	0	0	1	0	1
hsa-miR-124-5p	MIMAT0004591	ADC	113451	NM_052998	0	0	0	0	0	0	0	0	0	0	1	0	1
hsa-miR-124-5p	MIMAT0004591	ADC	113451	XM_005270407	0	0	0	0	0	0	0	0	0	0	1	0	1
hsa-miR-124-5p	MIMAT0004591	ADC	113451	XM_005270406	0	0	0	0	0	0	0	0	0	0	1	0	1
hsa-miR-124-5p	MIMAT0004591	ADC	113451	XM_005270405	0	0	0	0	0	0	0	0	0	0	1	0	1
hsa-miR-124-5p	MIMAT0004591	ADC	113451	XM_005270404	0	0	0	0	0	0	0	0	0	0	1	0	1
hsa-miR-124-5p	MIMAT0004591	ADCK1	57143	NM_020421	0	0	0	0	0	1	0	0	0	0	1	0	2
hsa-miR-124-5p	MIMAT0004591	ADCK1	57143	XM_005267887	0	0	0	0	0	1	0	0	0	0	1	0	2
hsa-miR-124-5p	MIMAT0004591	ADCK1	57143	XM_005267886	0	0	0	0	0	1	0	0	0	0	1	0	2
hsa-miR-124-5p	MIMAT0004591	ADCK1	57143	NM_001142545	0	0	0	0	0	1	0	0	0	0	1	0	2
hsa-miR-124-5p	MIMAT0004591	ADCK1	57143	XM_005267885	0	0	0	0	0	1	0	0	0	0	1	0	2
hsa-miR-124-5p	MIMAT0004591	ADCK2	90956	NM_052853	0	0	0	0	0	0	0	0	0	0	1	0	1
hsa-miR-124-5p	MIMAT0004591	ADCK3	56997	XM_005273202	0	0	0	0	0	0	0	0	0	0	1	0	1
hsa-miR-124-5p	MIMAT0004591	ADCK3	56997	XM_005273207	0	0	0	0	0	0	0	0	0	0	1	0	1
hsa-miR-124-5p	MIMAT0004591	ADCK3	56997	XM_005273203	0	0	0	0	0	0	0	0	0	0	1	0	1
hsa-miR-124-5p	MIMAT0004591	ADCK3	56997	XM_005273201	0	0	0	0	0	0	0	0	0	0	1	0	1
hsa-miR-124-5p	MIMAT0004591	ADCK3	56997	XM_005273206	0	0	0	0	0	0	0	0	0	0	1	0	1
hsa-miR-124-5p	MIMAT0004591	ADCK3	56997	XM_005273204	0	0	0	0	0	0	0	0	0	0	1	0	1
hsa-miR-124-5p	MIMAT0004591	ADCK3	56997	XM_005273205	0	0	0	0	0	0	0	0	0	0	1	0	1
hsa-miR-124-5p	MIMAT0004591	ADCK3	56997	NM_020247	0	0	0	0	0	0	0	0	0	0	1	0	1
hsa-miR-124-5p	MIMAT0004591	ADCK4	79934	XM_005259270	0	0	0	0	0	0	0	0	0	0	1	0	1
hsa-miR-124-5p	MIMAT0004591	ADCK4	79934	NM_001142555	0	0	0	0	0	0	0	0	0	0	1	0	1
hsa-miR-124-5p	MIMAT0004591	ADCK4	79934	XM_005259275	0	0	0	0	0	0	0	0	0	0	1	0	1
hsa-miR-124-5p	MIMAT0004591	ADCK4	79934	XM_005259274	0	0	0	0	0	0	0	0	0	0	1	0	1
hsa-miR-124-5p	MIMAT0004591	ADCK4	79934	XM_005259273	0	0	0	0	0	0	0	0	0	0	1	0	1
hsa-miR-124-5p	MIMAT0004591	ADCK4	79934	XM_005259272	0	0	0	0	0	0	0	0	0	0	1	0	1
hsa-miR-124-5p	MIMAT0004591	ADCK4	79934	XM_005259271	0	0	0	0	0	0	0	0	0	0	1	0	1
hsa-miR-124-5p	MIMAT0004591	ADCK4	79934	NM_024876	0	0	0	0	0	0	0	0	0	0	1	0	1
hsa-miR-124-5p	MIMAT0004591	ADCK5	203054	XM_005272312	0	0	0	0	0	0	0	0	0	0	1	0	1
hsa-miR-124-5p	MIMAT0004591	ADCK5	203054	XM_005276839	0	0	0	0	0	0	0	0	0	0	1	0	1
hsa-miR-124-5p	MIMAT0004591	ADCK5	203054	XM_005272313	0	0	0	0	0	0	0	0	0	0	1	0	1
hsa-miR-124-5p	MIMAT0004591	ADCK5	203054	NM_174922	0	0	0	0	0	0	0	0	0	0	1	0	1
hsa-miR-124-5p	MIMAT0004591	ADCK5	203054	XM_005276838	0	0	0	0	0	0	0	0	0	0	1	0	1
hsa-miR-124-5p	MIMAT0004591	ADCY1	107	NM_021116	1	1	1	0	0	1	0	0	0	1	1	1	7
hsa-miR-124-5p	MIMAT0004591	ADCY1	107	XM_005249585	0	0	0	0	0	1	0	0	0	0	1	1	3
hsa-miR-124-5p	MIMAT0004591	ADCY1	107	XM_005249584	0	0	0	0	0	1	0	0	0	0	0	0	1
hsa-miR-124-5p	MIMAT0004591	ADCY10	55811	XM_005245329	0	0	0	0	0	0	0	0	0	0	1	0	1
hsa-miR-124-5p	MIMAT0004591	ADCY10	55811	NM_001167749	0	0	0	0	0	0	0	0	0	0	1	0	1
hsa-miR-124-5p	MIMAT0004591	ADCY10	55811	NM_018417	0	0	0	0	0	0	0	0	0	0	1	0	1
hsa-miR-124-5p	MIMAT0004591	ADCY2	108	NM_020546	1	1	1	0	0	1	0	0	0	0	1	1	6
hsa-miR-124-5p	MIMAT0004591	ADCY3	109	XM_005264102	0	0	0	0	0	0	0	0	0	0	1	0	1
hsa-miR-124-5p	MIMAT0004591	ADCY3	109	XM_005264106	0	0	0	0	0	0	0	0	0	0	1	0	1
hsa-miR-124-5p	MIMAT0004591	ADCY3	109	NM_004036	0	0	0	0	0	0	0	0	0	0	1	0	1
hsa-miR-124-5p	MIMAT0004591	ADCY3	109	XM_005264105	0	0	0	0	0	0	0	0	0	0	1	0	1
hsa-miR-124-5p	MIMAT0004591	ADCY3	109	XM_005264104	0	0	0	0	0	0	0	0	0	0	1	0	1
hsa-miR-124-5p	MIMAT0004591	ADCY3	109	XM_005264103	0	0	0	0	0	0	0	0	0	0	1	0	1
hsa-miR-124-5p	MIMAT0004591	ADCY4	196883	NM_001198568	0	1	0	0	0	0	0	0	0	1	1	0	3
hsa-miR-124-5p	MIMAT0004591	ADCY4	196883	XM_005267394	0	0	0	0	0	0	0	0	0	0	1	0	1
hsa-miR-124-5p	MIMAT0004591	ADCY4	196883	XM_005267393	0	0	0	0	0	0	0	0	0	0	1	0	1
hsa-miR-124-5p	MIMAT0004591	ADCY4	196883	XM_005267391	0	0	0	0	0	0	0	0	0	0	1	0	1
hsa-miR-124-5p	MIMAT0004591	ADCY4	196883	NM_139247	0	0	0	0	0	0	0	0	0	0	1	0	1
hsa-miR-124-5p	MIMAT0004591	ADCY4	196883	NM_001198592	0	0	0	0	0	0	0	0	0	0	1	0	1
hsa-miR-124-5p	MIMAT0004591	ADCY5	111	XM_005247077	0	0	1	0	0	1	0	0	0	1	1	1	5
hsa-miR-124-5p	MIMAT0004591	ADCY5	111	NM_001199642	0	0	1	0	0	1	0	0	0	0	1	1	4
hsa-miR-124-5p	MIMAT0004591	ADCY5	111	XM_005247078	0	0	1	0	0	1	0	0	0	0	1	1	4
hsa-miR-124-5p	MIMAT0004591	ADCY5	111	XM_005247079	0	0	1	0	0	1	0	0	0	0	1	1	4
hsa-miR-124-5p	MIMAT0004591	ADCY5	111	NM_183357	0	0	1	0	0	1	0	0	0	0	1	1	4
hsa-miR-124-5p	MIMAT0004591	ADCY6	112	NM_015270	0	0	0	0	0	0	0	0	0	1	1	0	2
hsa-miR-124-5p	MIMAT0004591	ADCY6	112	NM_020983	0	0	0	0	0	0	0	0	0	0	1	0	1
hsa-miR-124-5p	MIMAT0004591	ADCY6	112	XM_005268605	0	0	0	0	0	0	0	0	0	0	1	0	1
hsa-miR-124-5p	MIMAT0004591	ADCY7	113	XM_005255783	0	0	0	0	0	0	0	0	0	1	1	0	2
hsa-miR-124-5p	MIMAT0004591	ADCY7	113	XM_005255786	0	0	0	0	0	0	0	0	0	0	1	0	1
hsa-miR-124-5p	MIMAT0004591	ADCY7	113	XM_005255785	0	0	0	0	0	0	0	0	0	0	1	0	1
hsa-miR-124-5p	MIMAT0004591	ADCY7	113	NM_001114	0	0	0	0	0	0	0	0	0	0	1	0	1
hsa-miR-124-5p	MIMAT0004591	ADCY7	113	XM_005255779	0	0	0	0	0	0	0	0	0	0	1	0	1
hsa-miR-124-5p	MIMAT0004591	ADCY7	113	XM_005255784	0	0	0	0	0	0	0	0	0	0	1	0	1
hsa-miR-124-5p	MIMAT0004591	ADCY7	113	XM_005255781	0	0	0	0	0	0	0	0	0	0	1	0	1
hsa-miR-124-5p	MIMAT0004591	ADCY7	113	XM_005255782	0	0	0	0	0	0	0	0	0	0	1	0	1
hsa-miR-124-5p	MIMAT0004591	ADCY7	113	XM_005255780	0	0	0	0	0	0	0	0	0	0	1	0	1
hsa-miR-124-5p	MIMAT0004591	ADCY9	115	NM_001116	0	0	0	0	0	0	0	0	0	1	1	0	2
hsa-miR-124-5p	MIMAT0004591	ADCY9	115	XM_005255079	0	0	0	0	0	0	0	0	0	0	1	0	1
hsa-miR-124-5p	MIMAT0004591	ADCYAP1	116	XM_005258081	0	0	0	0	0	0	0	0	0	0	1	0	1
hsa-miR-124-5p	MIMAT0004591	ADCYAP1	116	NM_001099733	0	0	0	0	0	0	0	0	0	0	1	0	1
hsa-miR-124-5p	MIMAT0004591	ADCYAP1	116	NM_001117	0	0	0	0	0	0	0	0	0	0	1	0	1
hsa-miR-124-5p	MIMAT0004591	ADCYAP1R1	117	NM_001199635	0	0	0	0	0	1	0	0	0	1	1	0	3
hsa-miR-124-5p	MIMAT0004591	ADCYAP1R1	117	XM_005249618	0	0	0	0	0	1	0	0	0	0	1	0	2
hsa-miR-124-5p	MIMAT0004591	ADCYAP1R1	117	NM_001199637	0	0	0	0	0	1	0	0	0	0	1	0	2
hsa-miR-124-5p	MIMAT0004591	ADCYAP1R1	117	NM_001118	0	0	0	0	0	1	0	0	0	0	1	0	2
hsa-miR-124-5p	MIMAT0004591	ADCYAP1R1	117	NM_001199636	0	0	0	0	0	1	0	0	0	0	1	0	2
hsa-miR-124-5p	MIMAT0004591	ADD1	118	XM_005247936	1	0	0	0	0	0	0	0	0	1	1	0	3
hsa-miR-124-5p	MIMAT0004591	ADD1	118	NM_001119	1	0	0	0	0	0	0	0	0	0	1	0	2
hsa-miR-124-5p	MIMAT0004591	ADD1	118	NM_014190	1	0	0	0	0	0	0	0	0	0	1	0	2
hsa-miR-124-5p	MIMAT0004591	ADD1	118	NM_014189	1	0	0	0	0	0	0	0	0	0	1	0	2
hsa-miR-124-5p	MIMAT0004591	ADD1	118	NM_176801	1	0	0	0	0	0	0	0	0	0	1	0	2
hsa-miR-124-5p	MIMAT0004591	ADD1	118	XM_005247938	1	0	0	0	0	0	0	0	0	0	1	0	2
hsa-miR-124-5p	MIMAT0004591	ADD1	118	XM_005247935	1	0	0	0	0	0	0	0	0	0	1	0	2
hsa-miR-124-5p	MIMAT0004591	ADD1	118	XM_005247934	1	0	0	0	0	0	0	0	0	0	1	0	2
hsa-miR-124-5p	MIMAT0004591	ADD1	118	XM_005247933	1	0	0	0	0	0	0	0	0	0	1	0	2
hsa-miR-124-5p	MIMAT0004591	ADD2	119	XM_005264128	1	0	1	0	0	1	0	0	0	1	1	1	6
hsa-miR-124-5p	MIMAT0004591	ADD2	119	XM_005278321	1	0	1	0	0	1	0	0	0	1	1	1	6
hsa-miR-124-5p	MIMAT0004591	ADD2	119	NM_001185055	0	0	0	0	0	1	0	0	0	0	1	0	2
hsa-miR-124-5p	MIMAT0004591	ADD2	119	NM_001185054	0	0	0	0	0	1	0	0	0	0	1	0	2
hsa-miR-124-5p	MIMAT0004591	ADD2	119	NM_017482	0	0	0	0	0	1	0	0	0	0	1	0	2
hsa-miR-124-5p	MIMAT0004591	ADD2	119	NM_001617	0	0	0	0	0	1	0	0	0	0	1	0	2
hsa-miR-124-5p	MIMAT0004591	ADD2	119	NM_017488	0	0	0	0	0	1	0	0	0	0	1	0	2
hsa-miR-124-5p	MIMAT0004591	ADD3	120	XM_005269535	1	0	0	0	0	0	0	0	0	0	1	0	2
hsa-miR-124-5p	MIMAT0004591	ADD3	120	NM_019903	1	0	0	0	0	0	0	0	0	0	1	0	2
hsa-miR-124-5p	MIMAT0004591	ADD3	120	XM_005269533	1	0	0	0	0	0	0	0	0	0	1	0	2
hsa-miR-124-5p	MIMAT0004591	ADD3	120	XM_005269534	1	0	0	0	0	0	0	0	0	0	1	0	2
hsa-miR-124-5p	MIMAT0004591	ADD3	120	XM_005269531	1	0	0	0	0	0	0	0	0	0	1	0	2
hsa-miR-124-5p	MIMAT0004591	ADD3	120	XM_005269532	1	0	0	0	0	0	0	0	0	0	1	0	2
hsa-miR-124-5p	MIMAT0004591	ADD3	120	NM_001121	1	0	0	0	0	0	0	0	0	0	1	0	2
hsa-miR-124-5p	MIMAT0004591	ADD3	120	XM_005269530	1	0	0	0	0	0	0	0	0	0	1	0	2
hsa-miR-124-5p	MIMAT0004591	ADD3	120	XM_005269529	1	0	0	0	0	0	0	0	0	0	1	0	2
hsa-miR-124-5p	MIMAT0004591	ADD3	120	NM_016824	1	0	0	0	0	0	0	0	0	0	1	0	2
hsa-miR-124-5p	MIMAT0004591	ADGB	79747	NM_024694	0	1	0	0	0	0	0	0	0	1	1	0	3
hsa-miR-124-5p	MIMAT0004591	ADH1A	124	NM_000667	0	0	0	0	0	0	0	0	0	0	1	0	1
hsa-miR-124-5p	MIMAT0004591	ADH1B	125	NM_000668	0	0	0	0	0	0	0	0	0	0	1	0	1
hsa-miR-124-5p	MIMAT0004591	ADH1B	125	XM_005262730	0	0	0	0	0	0	0	0	0	0	1	0	1
hsa-miR-124-5p	MIMAT0004591	ADH1C	126	NM_000669	0	0	0	0	0	0	0	0	0	0	1	0	1
hsa-miR-124-5p	MIMAT0004591	ADH4	127	NM_000670	1	0	0	0	0	1	0	0	0	0	1	1	4
hsa-miR-124-5p	MIMAT0004591	ADH5	128	NM_000671	0	0	0	0	0	0	0	0	0	0	1	0	1
hsa-miR-124-5p	MIMAT0004591	ADH6	130	NM_000672	0	0	0	0	0	0	0	0	0	0	1	0	1
hsa-miR-124-5p	MIMAT0004591	ADH6	130	NM_001102470	0	0	0	0	0	0	0	0	0	0	1	0	1
hsa-miR-124-5p	MIMAT0004591	ADH6	130	XM_005262731	0	0	0	0	0	0	0	0	0	0	1	0	1
hsa-miR-124-5p	MIMAT0004591	ADH7	131	NM_000673	0	0	0	0	0	0	0	0	0	0	1	0	1
hsa-miR-124-5p	MIMAT0004591	ADH7	131	NM_001166504	0	0	0	0	0	0	0	0	0	0	1	0	1
hsa-miR-124-5p	MIMAT0004591	ADHFE1	137872	XM_005251157	0	1	0	0	0	0	0	0	0	0	1	0	2
hsa-miR-124-5p	MIMAT0004591	ADHFE1	137872	XM_005251163	0	0	0	0	0	0	0	0	0	0	1	0	1
hsa-miR-124-5p	MIMAT0004591	ADHFE1	137872	XM_005251161	0	0	0	0	0	0	0	0	0	0	1	0	1
hsa-miR-124-5p	MIMAT0004591	ADHFE1	137872	XM_005251160	0	0	0	0	0	0	0	0	0	0	1	0	1
hsa-miR-124-5p	MIMAT0004591	ADHFE1	137872	XM_005251162	0	0	0	0	0	0	0	0	0	0	1	0	1
hsa-miR-124-5p	MIMAT0004591	ADHFE1	137872	XM_005251158	0	0	0	0	0	0	0	0	0	0	1	0	1
hsa-miR-124-5p	MIMAT0004591	ADHFE1	137872	XM_005251155	0	0	0	0	0	0	0	0	0	0	1	0	1
hsa-miR-124-5p	MIMAT0004591	ADHFE1	137872	XM_005251159	0	0	0	0	0	0	0	0	0	0	1	0	1
hsa-miR-124-5p	MIMAT0004591	ADHFE1	137872	XM_005251154	0	0	0	0	0	0	0	0	0	0	1	0	1
hsa-miR-124-5p	MIMAT0004591	ADHFE1	137872	XM_005251153	0	0	0	0	0	0	0	0	0	0	1	0	1
hsa-miR-124-5p	MIMAT0004591	ADHFE1	137872	NM_144650	0	0	0	0	0	0	0	0	0	0	1	0	1
hsa-miR-124-5p	MIMAT0004591	ADHFE1	137872	XM_005251152	0	0	0	0	0	0	0	0	0	0	1	0	1
hsa-miR-124-5p	MIMAT0004591	ADHFE1	137872	XM_005251156	0	0	0	0	0	0	0	0	0	0	1	0	1
hsa-miR-124-5p	MIMAT0004591	ADI1	55256	XM_005264696	0	0	0	0	0	0	0	0	0	0	1	0	1
hsa-miR-124-5p	MIMAT0004591	ADI1	55256	NM_018269	0	0	0	0	0	0	0	0	0	0	1	0	1
hsa-miR-124-5p	MIMAT0004591	ADIG	149685	NM_001018082	0	0	0	0	0	0	0	0	0	1	1	0	2
hsa-miR-124-5p	MIMAT0004591	ADIPOQ	9370	NM_001177800	1	0	0	0	0	1	0	0	0	1	1	0	4
hsa-miR-124-5p	MIMAT0004591	ADIPOQ	9370	NM_004797	1	0	0	0	0	1	0	0	0	0	1	0	3
hsa-miR-124-5p	MIMAT0004591	ADIPOR1	51094	NM_015999	0	0	0	0	0	0	0	0	0	0	1	0	1
hsa-miR-124-5p	MIMAT0004591	ADIPOR2	79602	XM_005253790	0	0	0	0	0	1	0	0	0	1	1	0	3
hsa-miR-124-5p	MIMAT0004591	ADIPOR2	79602	NM_024551	0	0	0	0	0	1	0	0	0	0	1	0	2
hsa-miR-124-5p	MIMAT0004591	ADIPOR2	79602	XM_005253789	0	0	0	0	0	1	0	0	0	0	1	0	2
hsa-miR-124-5p	MIMAT0004591	ADIRF	10974	NM_006829	0	0	0	0	0	0	0	0	0	0	1	0	1
hsa-miR-124-5p	MIMAT0004591	ADK	132	NM_001123	0	0	0	0	0	0	0	0	0	0	1	0	1
hsa-miR-124-5p	MIMAT0004591	ADK	132	NM_001202450	0	0	0	0	0	0	0	0	0	0	1	0	1
hsa-miR-124-5p	MIMAT0004591	ADK	132	NM_006721	0	0	0	0	0	0	0	0	0	0	1	0	1
hsa-miR-124-5p	MIMAT0004591	ADK	132	NM_001202449	0	0	0	0	0	0	0	0	0	0	1	0	1
hsa-miR-124-5p	MIMAT0004591	ADM	133	NM_001124	0	0	0	0	0	0	0	0	0	0	1	0	1
hsa-miR-124-5p	MIMAT0004591	ADM2	79924	NM_024866	1	0	1	0	0	1	0	0	0	1	1	1	6
hsa-miR-124-5p	MIMAT0004591	ADM2	79924	NM_001253845	1	0	1	0	0	1	0	0	0	0	1	1	5
hsa-miR-124-5p	MIMAT0004591	ADM5	199800	NM_001101340	0	0	0	0	0	0	0	0	0	0	1	0	1
hsa-miR-124-5p	MIMAT0004591	ADNP	23394	NM_015339	0	0	1	0	0	0	0	0	0	0	1	1	3
hsa-miR-124-5p	MIMAT0004591	ADNP	23394	NM_181442	0	0	1	0	0	0	0	0	0	0	1	1	3
hsa-miR-124-5p	MIMAT0004591	ADNP2	22850	NM_014913	0	0	0	0	0	0	0	0	0	0	1	0	1
hsa-miR-124-5p	MIMAT0004591	ADNP2	22850	XM_005266656	0	0	0	0	0	0	0	0	0	0	1	0	1
hsa-miR-124-5p	MIMAT0004591	ADO	84890	NM_032804	0	0	0	0	0	0	0	0	0	0	1	0	1
hsa-miR-124-5p	MIMAT0004591	ADORA1	134	XM_005244901	1	0	0	0	0	1	0	0	0	0	1	0	3
hsa-miR-124-5p	MIMAT0004591	ADORA1	134	XM_005244902	1	0	0	0	0	1	0	0	0	0	1	0	3
hsa-miR-124-5p	MIMAT0004591	ADORA1	134	XM_005244903	1	0	0	0	0	1	0	0	0	0	1	0	3
hsa-miR-124-5p	MIMAT0004591	ADORA1	134	NM_001048230	1	0	0	0	0	1	0	0	0	0	1	0	3
hsa-miR-124-5p	MIMAT0004591	ADORA1	134	XM_005244899	1	0	0	0	0	1	0	0	0	0	1	0	3
hsa-miR-124-5p	MIMAT0004591	ADORA1	134	NM_000674	1	0	0	0	0	1	0	0	0	0	1	0	3
hsa-miR-124-5p	MIMAT0004591	ADORA2A	135	NM_001278497	0	0	0	0	0	0	0	0	0	1	1	0	2
hsa-miR-124-5p	MIMAT0004591	ADORA2A	135	NM_001278500	0	0	0	0	0	0	0	0	0	0	1	0	1
hsa-miR-124-5p	MIMAT0004591	ADORA2A	135	NM_001278499	0	0	0	0	0	0	0	0	0	0	1	0	1
hsa-miR-124-5p	MIMAT0004591	ADORA2A	135	NM_000675	0	0	0	0	0	0	0	0	0	0	1	0	1
hsa-miR-124-5p	MIMAT0004591	ADORA2A	135	NM_001278498	0	0	0	0	0	0	0	0	0	0	1	0	1
hsa-miR-124-5p	MIMAT0004591	ADORA2B	136	NM_000676	1	0	0	0	0	0	0	0	0	0	1	0	2
hsa-miR-124-5p	MIMAT0004591	ADORA3	140	NM_000677	0	0	0	0	0	0	0	0	0	1	1	0	2
hsa-miR-124-5p	MIMAT0004591	ADPGK	83440	NM_031284	0	0	0	0	0	0	0	0	0	0	1	0	1
hsa-miR-124-5p	MIMAT0004591	ADPRH	141	XM_005247126	0	0	0	0	0	0	0	0	0	1	1	0	2
hsa-miR-124-5p	MIMAT0004591	ADPRH	141	NM_001125	0	0	0	0	0	0	0	0	0	0	1	0	1
hsa-miR-124-5p	MIMAT0004591	ADPRH	141	XM_005247127	0	0	0	0	0	0	0	0	0	0	1	0	1
hsa-miR-124-5p	MIMAT0004591	ADPRHL1	113622	NM_199162	0	0	0	0	0	0	0	0	0	0	1	0	1
hsa-miR-124-5p	MIMAT0004591	ADPRHL1	113622	NM_138430	0	0	0	0	0	0	0	0	0	0	1	0	1
hsa-miR-124-5p	MIMAT0004591	ADPRHL2	54936	NM_017825	0	0	0	0	0	0	0	0	0	1	1	0	2
hsa-miR-124-5p	MIMAT0004591	ADPRHL2	54936	XM_005270973	0	0	0	0	0	0	0	0	0	0	1	0	1
hsa-miR-124-5p	MIMAT0004591	ADPRM	56985	XM_005256738	0	0	0	0	0	0	0	0	0	0	1	0	1
hsa-miR-124-5p	MIMAT0004591	ADPRM	56985	NM_020233	0	0	0	0	0	0	0	0	0	0	1	0	1
hsa-miR-124-5p	MIMAT0004591	ADRA1A	148	XM_005273414	0	0	0	0	0	0	0	0	0	0	1	0	1
hsa-miR-124-5p	MIMAT0004591	ADRA1A	148	XM_005273415	0	0	0	0	0	0	0	0	0	0	1	0	1
hsa-miR-124-5p	MIMAT0004591	ADRA1A	148	NM_033304	0	0	0	0	0	0	0	0	0	0	1	0	1
hsa-miR-124-5p	MIMAT0004591	ADRA1A	148	NM_033302	0	0	0	0	0	0	0	0	0	0	1	0	1
hsa-miR-124-5p	MIMAT0004591	ADRA1A	148	NM_000680	0	0	0	0	0	0	0	0	0	0	1	0	1
hsa-miR-124-5p	MIMAT0004591	ADRA1A	148	NM_033303	0	0	0	0	0	0	0	0	0	0	1	0	1
hsa-miR-124-5p	MIMAT0004591	ADRA1B	147	NM_000679	0	0	0	0	0	0	0	0	0	0	1	0	1
hsa-miR-124-5p	MIMAT0004591	ADRA1D	146	NM_000678	0	0	0	0	0	0	0	0	0	1	1	0	2
hsa-miR-124-5p	MIMAT0004591	ADRA2A	150	NM_000681	0	0	0	0	0	0	0	0	0	0	1	0	1
hsa-miR-124-5p	MIMAT0004591	ADRA2B	151	NM_000682	1	0	0	0	0	1	0	0	0	0	1	1	4
hsa-miR-124-5p	MIMAT0004591	ADRA2B	151	XM_005263890	1	0	0	0	0	1	0	0	0	0	1	0	3
hsa-miR-124-5p	MIMAT0004591	ADRA2B	151	XM_005263891	0	0	0	0	0	1	0	0	0	0	0	0	1
hsa-miR-124-5p	MIMAT0004591	ADRA2C	152	NM_000683	0	0	0	0	0	0	0	0	0	0	1	0	1
hsa-miR-124-5p	MIMAT0004591	ADRB1	153	NM_000684	0	0	0	0	0	1	0	0	0	0	1	1	3
hsa-miR-124-5p	MIMAT0004591	ADRB2	154	NM_000024	1	1	0	0	0	1	0	0	0	1	1	0	5
hsa-miR-124-5p	MIMAT0004591	ADRB2	154	XM_005268382	0	0	0	0	0	1	0	0	0	0	1	0	2
hsa-miR-124-5p	MIMAT0004591	ADRB2	154	XM_005268383	0	0	0	0	0	1	0	0	0	0	1	0	2
hsa-miR-124-5p	MIMAT0004591	ADRB3	155	NM_000025	0	0	0	0	0	0	0	0	0	0	1	0	1
hsa-miR-124-5p	MIMAT0004591	ADRBK1	156	NM_001619	0	0	0	0	0	0	0	0	0	0	1	0	1
hsa-miR-124-5p	MIMAT0004591	ADRBK2	157	NM_005160	0	1	0	0	0	0	0	0	0	0	1	0	2
hsa-miR-124-5p	MIMAT0004591	ADRM1	11047	NM_001281437	0	0	0	0	0	0	0	0	0	0	1	0	1
hsa-miR-124-5p	MIMAT0004591	ADRM1	11047	NM_001281438	0	0	0	0	0	0	0	0	0	0	1	0	1
hsa-miR-124-5p	MIMAT0004591	ADRM1	11047	NM_175573	0	0	0	0	0	0	0	0	0	0	1	0	1
hsa-miR-124-5p	MIMAT0004591	ADRM1	11047	NM_007002	0	0	0	0	0	0	0	0	0	0	1	0	1
hsa-miR-124-5p	MIMAT0004591	ADRM1	11047	XM_005260257	0	0	0	0	0	0	0	0	0	0	1	0	1
hsa-miR-124-5p	MIMAT0004591	ADRM1	11047	XM_005260258	0	0	0	0	0	0	0	0	0	0	1	0	1
hsa-miR-124-5p	MIMAT0004591	ADRM1	11047	XM_005260260	0	0	0	0	0	0	0	0	0	0	1	0	1
hsa-miR-124-5p	MIMAT0004591	ADSL	158	XM_005261377	0	0	0	0	0	0	0	0	0	1	0	0	1
hsa-miR-124-5p	MIMAT0004591	ADSS	159	NM_001126	0	1	0	0	0	1	0	0	0	0	1	1	4
hsa-miR-124-5p	MIMAT0004591	ADTRP	84830	XM_005249453	0	0	0	0	0	0	0	0	0	0	1	1	2
hsa-miR-124-5p	MIMAT0004591	ADTRP	84830	NM_032744	0	0	0	0	0	0	0	0	0	0	1	0	1
hsa-miR-124-5p	MIMAT0004591	ADTRP	84830	XM_005249454	0	0	0	0	0	0	0	0	0	0	1	0	1
hsa-miR-124-5p	MIMAT0004591	ADTRP	84830	NM_001143948	0	0	0	0	0	0	0	0	0	0	1	0	1
hsa-miR-124-5p	MIMAT0004591	AEBP1	165	NM_001129	0	0	0	0	0	0	0	0	0	0	1	0	1
hsa-miR-124-5p	MIMAT0004591	AEBP2	121536	NM_153207	0	0	0	0	0	0	0	0	0	0	1	0	1
hsa-miR-124-5p	MIMAT0004591	AEBP2	121536	NM_001267043	0	0	0	0	0	0	0	0	0	0	1	0	1
hsa-miR-124-5p	MIMAT0004591	AEBP2	121536	NM_001114176	0	0	0	0	0	0	0	0	0	0	1	0	1
hsa-miR-124-5p	MIMAT0004591	AEN	64782	XM_005254967	0	0	0	0	0	0	0	0	0	1	1	0	2
hsa-miR-124-5p	MIMAT0004591	AEN	64782	XM_005254966	0	0	0	0	0	0	0	0	0	0	1	0	1
hsa-miR-124-5p	MIMAT0004591	AEN	64782	NM_022767	0	0	0	0	0	0	0	0	0	0	1	0	1
hsa-miR-124-5p	MIMAT0004591	AES	166	NM_198969	0	0	0	0	0	0	0	0	0	0	1	0	1
hsa-miR-124-5p	MIMAT0004591	AES	166	NM_198970	0	0	0	0	0	0	0	0	0	0	1	0	1
hsa-miR-124-5p	MIMAT0004591	AES	166	NM_001130	0	0	0	0	0	0	0	0	0	0	1	0	1
hsa-miR-124-5p	MIMAT0004591	AFAP1	60312	NM_001134647	0	0	0	0	0	1	0	0	0	0	1	1	3
hsa-miR-124-5p	MIMAT0004591	AFAP1	60312	XM_005247994	0	0	0	0	0	1	0	0	0	0	1	1	3
hsa-miR-124-5p	MIMAT0004591	AFAP1	60312	XM_005247993	0	0	0	0	0	1	0	0	0	0	1	1	3
hsa-miR-124-5p	MIMAT0004591	AFAP1	60312	XM_005247992	0	0	0	0	0	1	0	0	0	0	1	1	3
hsa-miR-124-5p	MIMAT0004591	AFAP1	60312	NM_198595	0	0	0	0	0	1	0	0	0	0	1	1	3
hsa-miR-124-5p	MIMAT0004591	AFAP1	60312	XM_005247991	0	0	0	0	0	1	0	0	0	0	1	1	3
hsa-miR-124-5p	MIMAT0004591	AFAP1L1	134265	NM_152406	1	0	0	0	0	0	0	0	0	0	1	0	2
hsa-miR-124-5p	MIMAT0004591	AFAP1L1	134265	NM_001146337	1	0	0	0	0	0	0	0	0	0	1	0	2
hsa-miR-124-5p	MIMAT0004591	AFAP1L1	134265	XM_005268373	1	0	0	0	0	0	0	0	0	0	1	0	2
hsa-miR-124-5p	MIMAT0004591	AFAP1L2	84632	NM_001001936	0	0	0	0	0	0	0	0	0	1	1	0	2
hsa-miR-124-5p	MIMAT0004591	AFAP1L2	84632	XM_005270234	0	0	0	0	0	0	0	0	0	0	1	0	1
hsa-miR-124-5p	MIMAT0004591	AFAP1L2	84632	XM_005270239	0	0	0	0	0	0	0	0	0	0	1	0	1
hsa-miR-124-5p	MIMAT0004591	AFAP1L2	84632	XM_005270240	0	0	0	0	0	0	0	0	0	0	1	0	1
hsa-miR-124-5p	MIMAT0004591	AFAP1L2	84632	XM_005270236	0	0	0	0	0	0	0	0	0	0	1	0	1
hsa-miR-124-5p	MIMAT0004591	AFAP1L2	84632	NM_032550	0	0	0	0	0	0	0	0	0	0	1	0	1
hsa-miR-124-5p	MIMAT0004591	AFF1	4299	XM_005263009	1	1	0	0	0	1	0	0	0	1	1	0	5
hsa-miR-124-5p	MIMAT0004591	AFF1	4299	XM_005263010	1	1	0	0	0	1	0	0	0	1	1	0	5
hsa-miR-124-5p	MIMAT0004591	AFF1	4299	XM_005263011	1	0	0	0	0	1	0	0	0	0	1	0	3
hsa-miR-124-5p	MIMAT0004591	AFF1	4299	XM_005263012	1	0	0	0	0	1	0	0	0	0	1	0	3
hsa-miR-124-5p	MIMAT0004591	AFF1	4299	XM_005263008	1	0	0	0	0	1	0	0	0	0	1	0	3
hsa-miR-124-5p	MIMAT0004591	AFF1	4299	XM_005263007	1	0	0	0	0	1	0	0	0	0	1	0	3
hsa-miR-124-5p	MIMAT0004591	AFF1	4299	NM_001166693	1	0	0	0	0	1	0	0	0	0	1	0	3
hsa-miR-124-5p	MIMAT0004591	AFF1	4299	NM_005935	1	0	0	0	0	1	0	0	0	0	1	0	3
hsa-miR-124-5p	MIMAT0004591	AFF1	4299	XM_005263013	0	0	0	0	0	1	0	0	0	0	0	0	1
hsa-miR-124-5p	MIMAT0004591	AFF2	2334	NM_002025	0	1	1	0	0	1	0	0	0	1	1	1	6
hsa-miR-124-5p	MIMAT0004591	AFF2	2334	NM_001170628	0	0	1	0	0	1	0	0	0	0	1	1	4
hsa-miR-124-5p	MIMAT0004591	AFF2	2334	NM_001169125	0	0	1	0	0	1	0	0	0	0	1	1	4
hsa-miR-124-5p	MIMAT0004591	AFF2	2334	NM_001169122	0	0	1	0	0	1	0	0	0	0	1	1	4
hsa-miR-124-5p	MIMAT0004591	AFF2	2334	NM_001169124	0	0	1	0	0	1	0	0	0	0	1	1	4
hsa-miR-124-5p	MIMAT0004591	AFF2	2334	NM_001169123	0	0	1	0	0	1	0	0	0	0	1	1	4
hsa-miR-124-5p	MIMAT0004591	AFF3	3899	XM_005263941	0	1	1	0	0	1	0	0	0	1	1	1	6
hsa-miR-124-5p	MIMAT0004591	AFF3	3899	NM_001025108	0	0	1	0	0	1	0	0	0	0	1	1	4
hsa-miR-124-5p	MIMAT0004591	AFF3	3899	NM_002285	0	0	1	0	0	1	0	0	0	0	1	1	4
hsa-miR-124-5p	MIMAT0004591	AFF3	3899	XM_005263945	0	0	1	0	0	1	0	0	0	0	1	1	4
hsa-miR-124-5p	MIMAT0004591	AFF3	3899	XM_005263943	0	0	1	0	0	1	0	0	0	0	1	1	4
hsa-miR-124-5p	MIMAT0004591	AFF3	3899	XM_005263944	0	0	1	0	0	1	0	0	0	0	1	1	4
hsa-miR-124-5p	MIMAT0004591	AFF3	3899	XM_005263942	0	0	1	0	0	1	0	0	0	0	1	1	4
hsa-miR-124-5p	MIMAT0004591	AFF4	27125	XM_005271963	0	0	1	0	0	1	0	0	0	1	1	1	5
hsa-miR-124-5p	MIMAT0004591	AFF4	27125	XM_005271964	0	0	1	0	0	1	0	0	0	0	1	1	4
hsa-miR-124-5p	MIMAT0004591	AFF4	27125	NM_014423	0	0	1	0	0	1	0	0	0	0	1	1	4
hsa-miR-124-5p	MIMAT0004591	AFG3L2	10939	NM_006796	0	1	1	0	0	1	0	0	0	0	1	1	5
hsa-miR-124-5p	MIMAT0004591	AFM	173	NM_001133	0	0	0	0	0	0	0	0	0	1	0	0	1
hsa-miR-124-5p	MIMAT0004591	AFMID	125061	NM_001145526	1	0	0	0	0	1	0	0	0	0	1	0	3
hsa-miR-124-5p	MIMAT0004591	AFMID	125061	NM_001010982	1	0	0	0	0	1	0	0	0	0	1	0	3
hsa-miR-124-5p	MIMAT0004591	AFP	174	NM_001134	1	0	0	0	0	0	0	0	0	0	0	0	1
hsa-miR-124-5p	MIMAT0004591	AFTPH	54812	NM_203437	0	0	0	0	0	0	0	0	0	0	1	0	1
hsa-miR-124-5p	MIMAT0004591	AFTPH	54812	NM_001002243	0	0	0	0	0	0	0	0	0	0	1	0	1
hsa-miR-124-5p	MIMAT0004591	AFTPH	54812	NM_017657	0	0	0	0	0	0	0	0	0	0	1	0	1
hsa-miR-124-5p	MIMAT0004591	AFTPH	54812	XM_005264380	0	0	0	0	0	0	0	0	0	0	1	0	1
hsa-miR-124-5p	MIMAT0004591	AGA	175	NM_000027	0	0	0	0	0	0	0	0	0	1	1	0	2
hsa-miR-124-5p	MIMAT0004591	AGA	175	NM_001171988	0	0	0	0	0	0	0	0	0	0	1	0	1
hsa-miR-124-5p	MIMAT0004591	AGAP1	116987	NM_001037131	1	1	0	0	0	1	0	0	0	1	1	0	5
hsa-miR-124-5p	MIMAT0004591	AGAP1	116987	XM_005246062	1	0	0	0	0	1	0	0	0	0	1	0	3
hsa-miR-124-5p	MIMAT0004591	AGAP1	116987	XM_005246061	1	0	0	0	0	1	0	0	0	0	1	0	3
hsa-miR-124-5p	MIMAT0004591	AGAP1	116987	XM_005246064	1	0	0	0	0	1	0	0	0	0	1	0	3
hsa-miR-124-5p	MIMAT0004591	AGAP1	116987	XM_005246059	1	0	0	0	0	1	0	0	0	0	1	0	3
hsa-miR-124-5p	MIMAT0004591	AGAP1	116987	XM_005246060	1	0	0	0	0	1	0	0	0	0	1	0	3
hsa-miR-124-5p	MIMAT0004591	AGAP1	116987	XM_005246063	1	0	0	0	0	1	0	0	0	0	1	0	3
hsa-miR-124-5p	MIMAT0004591	AGAP1	116987	XM_005246058	1	0	0	0	0	1	0	0	0	0	1	0	3
hsa-miR-124-5p	MIMAT0004591	AGAP1	116987	NM_014914	1	0	0	0	0	1	0	0	0	0	1	0	3
hsa-miR-124-5p	MIMAT0004591	AGAP1	116987	NM_001244888	0	0	0	0	0	1	0	0	0	0	1	0	2
hsa-miR-124-5p	MIMAT0004591	AGAP10	728127	XM_001714786	0	0	0	0	0	0	0	0	0	0	1	0	1
hsa-miR-124-5p	MIMAT0004591	AGAP10	728127	XM_005275684	0	0	0	0	0	0	0	0	0	0	1	0	1
hsa-miR-124-5p	MIMAT0004591	AGAP10	728127	XM_003846493	0	0	0	0	0	0	0	0	0	0	1	0	1
hsa-miR-124-5p	MIMAT0004591	AGAP10	728127	XM_005276380	0	0	0	0	0	0	0	0	0	0	1	0	1
hsa-miR-124-5p	MIMAT0004591	AGAP11	119385	NM_133447	0	0	0	0	0	0	0	0	0	0	1	0	1
hsa-miR-124-5p	MIMAT0004591	AGAP2	116986	XM_005268624	0	0	0	0	0	1	0	0	0	1	1	0	3
hsa-miR-124-5p	MIMAT0004591	AGAP2	116986	NM_014770	0	0	0	0	0	1	0	0	0	0	1	0	2
hsa-miR-124-5p	MIMAT0004591	AGAP2	116986	XM_005268626	0	0	0	0	0	1	0	0	0	0	1	0	2
hsa-miR-124-5p	MIMAT0004591	AGAP2	116986	NM_001122772	0	0	0	0	0	1	0	0	0	0	1	0	2
hsa-miR-124-5p	MIMAT0004591	AGAP2	116986	XM_005268625	0	0	0	0	0	1	0	0	0	0	1	0	2
hsa-miR-124-5p	MIMAT0004591	AGAP3	116988	NM_031946	0	0	0	0	0	0	0	0	0	0	1	0	1
hsa-miR-124-5p	MIMAT0004591	AGAP3	116988	NM_001042535	0	0	0	0	0	0	0	0	0	0	1	0	1
hsa-miR-124-5p	MIMAT0004591	AGAP3	116988	XM_005249942	0	0	0	0	0	0	0	0	0	0	1	0	1
hsa-miR-124-5p	MIMAT0004591	AGAP3	116988	XM_005249941	0	0	0	0	0	0	0	0	0	0	1	0	1
hsa-miR-124-5p	MIMAT0004591	AGAP3	116988	XM_005249943	0	0	0	0	0	0	0	0	0	0	1	0	1
hsa-miR-124-5p	MIMAT0004591	AGAP3	116988	NM_001281300	0	0	0	0	0	0	0	0	0	0	1	0	1
hsa-miR-124-5p	MIMAT0004591	AGAP5	729092	XM_005270122	0	0	0	0	0	0	0	0	0	0	1	0	1
hsa-miR-124-5p	MIMAT0004591	AGAP5	729092	XM_005270121	0	0	0	0	0	0	0	0	0	0	1	0	1
hsa-miR-124-5p	MIMAT0004591	AGAP5	729092	XM_005270120	0	0	0	0	0	0	0	0	0	0	1	0	1
hsa-miR-124-5p	MIMAT0004591	AGAP5	729092	NM_001144000	0	0	0	0	0	0	0	0	0	0	1	0	1
hsa-miR-124-5p	MIMAT0004591	AGAP5	729092	XM_005270119	0	0	0	0	0	0	0	0	0	0	1	0	1
hsa-miR-124-5p	MIMAT0004591	AGAP9	642517	NM_001190810	0	0	0	0	0	0	0	0	0	0	1	0	1
hsa-miR-124-5p	MIMAT0004591	AGBL2	79841	XM_005253137	0	0	0	0	0	0	0	0	0	0	1	0	1
hsa-miR-124-5p	MIMAT0004591	AGBL2	79841	NM_024783	0	0	0	0	0	0	0	0	0	0	1	0	1
hsa-miR-124-5p	MIMAT0004591	AGBL2	79841	XM_005253140	0	0	0	0	0	0	0	0	0	0	1	0	1
hsa-miR-124-5p	MIMAT0004591	AGBL2	79841	XM_005253139	0	0	0	0	0	0	0	0	0	0	1	0	1
hsa-miR-124-5p	MIMAT0004591	AGBL2	79841	XM_005253138	0	0	0	0	0	0	0	0	0	0	1	0	1
hsa-miR-124-5p	MIMAT0004591	AGBL3	340351	NM_178563	0	0	0	0	0	0	0	0	0	0	1	0	1
hsa-miR-124-5p	MIMAT0004591	AGBL4	84871	NM_032785	0	0	0	0	0	1	0	0	0	1	1	1	4
hsa-miR-124-5p	MIMAT0004591	AGBL4	84871	XM_005271284	0	0	0	0	0	1	0	0	0	0	1	1	3
hsa-miR-124-5p	MIMAT0004591	AGBL5	60509	XM_005264475	0	0	0	0	0	0	0	0	0	0	1	0	1
hsa-miR-124-5p	MIMAT0004591	AGBL5	60509	XM_005264477	0	0	0	0	0	0	0	0	0	0	1	0	1
hsa-miR-124-5p	MIMAT0004591	AGBL5	60509	NM_021831	0	0	0	0	0	0	0	0	0	0	1	0	1
hsa-miR-124-5p	MIMAT0004591	AGBL5	60509	XM_005264474	0	0	0	0	0	0	0	0	0	0	1	0	1
hsa-miR-124-5p	MIMAT0004591	AGBL5	60509	XM_005264473	0	0	0	0	0	0	0	0	0	0	1	0	1
hsa-miR-124-5p	MIMAT0004591	AGER	177	NM_001206940	0	0	0	0	0	0	0	0	0	0	1	0	1
hsa-miR-124-5p	MIMAT0004591	AGER	177	NM_001206934	0	0	0	0	0	0	0	0	0	0	1	0	1
hsa-miR-124-5p	MIMAT0004591	AGFG1	3267	XM_005246516	1	1	1	0	0	1	0	0	0	0	1	1	6
hsa-miR-124-5p	MIMAT0004591	AGFG1	3267	NM_001135189	1	0	1	0	0	1	0	0	0	0	1	1	5
hsa-miR-124-5p	MIMAT0004591	AGFG1	3267	NM_001135188	1	0	1	0	0	1	0	0	0	0	1	1	5
hsa-miR-124-5p	MIMAT0004591	AGFG1	3267	NM_004504	1	0	1	0	0	1	0	0	0	0	1	1	5
hsa-miR-124-5p	MIMAT0004591	AGFG1	3267	NM_001135187	1	0	1	0	0	1	0	0	0	0	1	1	5
hsa-miR-124-5p	MIMAT0004591	AGFG2	3268	NM_006076	0	0	0	0	0	0	0	0	0	1	1	0	2
hsa-miR-124-5p	MIMAT0004591	AGFG2	3268	XM_005250306	0	0	0	0	0	0	0	0	0	0	1	0	1
hsa-miR-124-5p	MIMAT0004591	AGGF1	55109	NM_018046	0	0	0	0	0	0	0	0	0	1	1	0	2
hsa-miR-124-5p	MIMAT0004591	AGK	55750	NM_018238	0	0	0	0	0	0	0	0	0	0	1	0	1
hsa-miR-124-5p	MIMAT0004591	AGK	55750	XM_005250023	0	0	0	0	0	0	0	0	0	0	1	0	1
hsa-miR-124-5p	MIMAT0004591	AGK	55750	XM_005250021	0	0	0	0	0	0	0	0	0	0	1	0	1
hsa-miR-124-5p	MIMAT0004591	AGK	55750	XM_005250022	0	0	0	0	0	0	0	0	0	0	1	0	1
hsa-miR-124-5p	MIMAT0004591	AGL	178	NM_000028	0	0	0	0	0	0	0	0	0	0	1	0	1
hsa-miR-124-5p	MIMAT0004591	AGL	178	XM_005270557	0	0	0	0	0	0	0	0	0	0	1	0	1
hsa-miR-124-5p	MIMAT0004591	AGL	178	NM_000644	0	0	0	0	0	0	0	0	0	0	1	0	1
hsa-miR-124-5p	MIMAT0004591	AGL	178	NM_000643	0	0	0	0	0	0	0	0	0	0	1	0	1
hsa-miR-124-5p	MIMAT0004591	AGL	178	NM_000645	0	0	0	0	0	0	0	0	0	0	1	0	1
hsa-miR-124-5p	MIMAT0004591	AGL	178	NM_000646	0	0	0	0	0	0	0	0	0	0	1	0	1
hsa-miR-124-5p	MIMAT0004591	AGL	178	NM_000642	0	0	0	0	0	0	0	0	0	0	1	0	1
hsa-miR-124-5p	MIMAT0004591	AGMAT	79814	NM_024758	1	0	0	0	0	0	0	0	0	0	1	0	2
hsa-miR-124-5p	MIMAT0004591	AGMO	392636	NM_001004320	0	0	0	0	0	0	0	0	0	0	1	0	1
hsa-miR-124-5p	MIMAT0004591	AGO1	26523	XM_005270747	1	0	0	0	0	0	0	0	0	0	1	0	2
hsa-miR-124-5p	MIMAT0004591	AGO1	26523	XM_005270746	1	0	0	0	0	0	0	0	0	0	1	0	2
hsa-miR-124-5p	MIMAT0004591	AGO1	26523	NM_012199	0	0	0	0	0	0	0	0	0	0	1	0	1
hsa-miR-124-5p	MIMAT0004591	AGO2	27161	NM_012154	0	1	0	0	0	0	0	0	0	1	1	0	3
hsa-miR-124-5p	MIMAT0004591	AGO2	27161	NM_001164623	0	0	0	0	0	0	0	0	0	0	1	0	1
hsa-miR-124-5p	MIMAT0004591	AGO3	192669	XM_005270575	0	0	0	0	0	1	0	0	0	0	1	1	3
hsa-miR-124-5p	MIMAT0004591	AGO3	192669	XM_005270576	0	0	0	0	0	1	0	0	0	0	1	1	3
hsa-miR-124-5p	MIMAT0004591	AGO3	192669	NM_177422	0	0	0	0	0	1	0	0	0	0	1	1	3
hsa-miR-124-5p	MIMAT0004591	AGO3	192669	NM_024852	0	0	0	0	0	1	0	0	0	0	1	1	3
hsa-miR-124-5p	MIMAT0004591	AGO4	192670	NM_017629	0	0	0	0	0	0	0	0	0	1	1	0	2
hsa-miR-124-5p	MIMAT0004591	AGO4	192670	XM_005270579	0	0	0	0	0	0	0	0	0	0	1	0	1
hsa-miR-124-5p	MIMAT0004591	AGO4	192670	XM_005270577	0	0	0	0	0	0	0	0	0	0	1	0	1
hsa-miR-124-5p	MIMAT0004591	AGO4	192670	XM_005270578	0	0	0	0	0	0	0	0	0	0	1	0	1
hsa-miR-124-5p	MIMAT0004591	AGPAT1	10554	XM_005248805	0	0	0	0	0	0	0	0	0	1	1	0	2
hsa-miR-124-5p	MIMAT0004591	AGPAT1	10554	XM_005248806	0	0	0	0	0	0	0	0	0	0	1	0	1
hsa-miR-124-5p	MIMAT0004591	AGPAT1	10554	NM_032741	0	0	0	0	0	0	0	0	0	0	1	0	1
hsa-miR-124-5p	MIMAT0004591	AGPAT1	10554	XM_005248807	0	0	0	0	0	0	0	0	0	0	1	0	1
hsa-miR-124-5p	MIMAT0004591	AGPAT1	10554	XM_005248808	0	0	0	0	0	0	0	0	0	0	1	0	1
hsa-miR-124-5p	MIMAT0004591	AGPAT1	10554	NM_006411	0	0	0	0	0	0	0	0	0	0	1	0	1
hsa-miR-124-5p	MIMAT0004591	AGPAT2	10555	NM_006412	0	0	0	0	0	0	0	0	0	0	1	0	1
hsa-miR-124-5p	MIMAT0004591	AGPAT2	10555	NM_001012727	0	0	0	0	0	0	0	0	0	0	1	0	1
hsa-miR-124-5p	MIMAT0004591	AGPAT3	56894	XM_005261159	0	0	1	0	0	1	0	0	0	1	1	1	5
hsa-miR-124-5p	MIMAT0004591	AGPAT3	56894	XM_005261161	0	0	1	0	0	1	0	0	0	0	1	1	4
hsa-miR-124-5p	MIMAT0004591	AGPAT3	56894	XM_005261160	0	0	1	0	0	1	0	0	0	0	1	1	4
hsa-miR-124-5p	MIMAT0004591	AGPAT3	56894	NM_001037553	0	0	1	0	0	1	0	0	0	0	1	1	4
hsa-miR-124-5p	MIMAT0004591	AGPAT3	56894	NM_020132	0	0	1	0	0	1	0	0	0	0	1	1	4
hsa-miR-124-5p	MIMAT0004591	AGPAT4	56895	NM_020133	1	0	1	0	1	1	0	0	0	1	1	1	7
hsa-miR-124-5p	MIMAT0004591	AGPAT4	56895	XM_005267054	1	0	1	0	0	1	0	0	0	0	1	1	5
hsa-miR-124-5p	MIMAT0004591	AGPAT4	56895	XM_005267056	1	0	1	0	0	1	0	0	0	0	1	1	5
hsa-miR-124-5p	MIMAT0004591	AGPAT4	56895	XM_005267052	1	0	1	0	0	1	0	0	0	0	1	1	5
hsa-miR-124-5p	MIMAT0004591	AGPAT4	56895	XM_005267053	1	0	1	0	0	1	0	0	0	0	1	1	5
hsa-miR-124-5p	MIMAT0004591	AGPAT4	56895	XM_005267055	0	0	0	0	0	1	0	0	0	0	0	0	1
hsa-miR-124-5p	MIMAT0004591	AGPAT5	55326	NM_018361	1	0	0	0	0	0	0	0	0	0	1	0	2
hsa-miR-124-5p	MIMAT0004591	AGPAT6	137964	XM_005273402	0	0	0	0	0	0	0	0	0	1	1	0	2
hsa-miR-124-5p	MIMAT0004591	AGPAT6	137964	XM_005273403	0	0	0	0	0	0	0	0	0	0	1	0	1
hsa-miR-124-5p	MIMAT0004591	AGPAT6	137964	NM_178819	0	0	0	0	0	0	0	0	0	0	1	0	1
hsa-miR-124-5p	MIMAT0004591	AGPAT9	84803	NM_032717	0	0	0	0	0	0	0	0	0	0	1	0	1
hsa-miR-124-5p	MIMAT0004591	AGPAT9	84803	NM_001256421	0	0	0	0	0	0	0	0	0	0	1	0	1
hsa-miR-124-5p	MIMAT0004591	AGPAT9	84803	NM_001256422	0	0	0	0	0	0	0	0	0	0	1	0	1
hsa-miR-124-5p	MIMAT0004591	AGPAT9	84803	XM_005263314	0	0	0	0	0	0	0	0	0	0	1	0	1
hsa-miR-124-5p	MIMAT0004591	AGPS	8540	NM_003659	1	0	1	0	0	1	0	0	0	1	1	1	6
hsa-miR-124-5p	MIMAT0004591	AGPS	8540	XM_005246916	1	0	1	0	0	1	0	0	0	0	1	1	5
hsa-miR-124-5p	MIMAT0004591	AGPS	8540	XM_005246917	1	0	1	0	0	1	0	0	0	0	1	1	5
hsa-miR-124-5p	MIMAT0004591	AGR2	10551	XM_005249581	0	1	1	0	0	1	0	0	0	0	1	1	5
hsa-miR-124-5p	MIMAT0004591	AGR2	10551	NM_006408	0	0	1	0	0	1	0	0	0	0	1	1	4
hsa-miR-124-5p	MIMAT0004591	AGRN	375790	XM_005244750	0	0	0	0	0	0	0	0	0	0	1	0	1
hsa-miR-124-5p	MIMAT0004591	AGRN	375790	XM_005244749	0	0	0	0	0	0	0	0	0	0	1	0	1
hsa-miR-124-5p	MIMAT0004591	AGRN	375790	NM_198576	0	0	0	0	0	0	0	0	0	0	1	0	1
hsa-miR-124-5p	MIMAT0004591	AGRN	375790	XM_005244748	0	0	0	0	0	0	0	0	0	0	1	0	1
hsa-miR-124-5p	MIMAT0004591	AGT	183	NM_000029	0	0	0	0	0	0	0	0	0	1	1	1	3
hsa-miR-124-5p	MIMAT0004591	AGTPBP1	23287	XM_005251848	0	1	0	0	0	1	0	0	0	1	1	0	4
hsa-miR-124-5p	MIMAT0004591	AGTPBP1	23287	XM_005251846	0	0	0	0	0	1	0	0	0	0	1	0	2
hsa-miR-124-5p	MIMAT0004591	AGTPBP1	23287	XM_005251849	0	0	0	0	0	1	0	0	0	0	1	0	2
hsa-miR-124-5p	MIMAT0004591	AGTPBP1	23287	NM_015239	0	0	0	0	0	1	0	0	0	0	1	0	2
hsa-miR-124-5p	MIMAT0004591	AGTPBP1	23287	XM_005251845	0	0	0	0	0	1	0	0	0	0	1	0	2
hsa-miR-124-5p	MIMAT0004591	AGTPBP1	23287	XM_005251847	0	0	0	0	0	1	0	0	0	0	1	0	2
hsa-miR-124-5p	MIMAT0004591	AGTR1	185	NM_031850	0	0	0	0	0	0	0	0	0	0	1	0	1
hsa-miR-124-5p	MIMAT0004591	AGTR1	185	NM_032049	0	0	0	0	0	0	0	0	0	0	1	0	1
hsa-miR-124-5p	MIMAT0004591	AGTR1	185	NM_009585	0	0	0	0	0	0	0	0	0	0	1	0	1
hsa-miR-124-5p	MIMAT0004591	AGTR1	185	NM_004835	0	0	0	0	0	0	0	0	0	0	1	0	1
hsa-miR-124-5p	MIMAT0004591	AGTR1	185	NM_000685	0	0	0	0	0	0	0	0	0	0	1	0	1
hsa-miR-124-5p	MIMAT0004591	AGTR2	186	NM_000686	0	0	0	0	0	0	0	0	0	0	1	0	1
hsa-miR-124-5p	MIMAT0004591	AGTRAP	57085	NM_001040197	0	0	0	0	0	0	0	0	0	0	1	0	1
hsa-miR-124-5p	MIMAT0004591	AGTRAP	57085	NM_001040195	0	0	0	0	0	0	0	0	0	0	1	0	1
hsa-miR-124-5p	MIMAT0004591	AGTRAP	57085	NM_001040194	0	0	0	0	0	0	0	0	0	0	1	0	1
hsa-miR-124-5p	MIMAT0004591	AGTRAP	57085	NM_020350	0	0	0	0	0	0	0	0	0	0	1	0	1
hsa-miR-124-5p	MIMAT0004591	AGTRAP	57085	NM_001040196	0	0	0	0	0	0	0	0	0	0	1	0	1
hsa-miR-124-5p	MIMAT0004591	AGXT	189	NM_000030	0	0	0	0	0	0	0	0	0	0	1	0	1
hsa-miR-124-5p	MIMAT0004591	AGXT2	64902	NM_031900	0	0	0	0	0	1	0	0	0	1	1	0	3
hsa-miR-124-5p	MIMAT0004591	AGXT2	64902	XM_005248340	0	0	0	0	0	1	0	0	0	0	0	0	1
hsa-miR-124-5p	MIMAT0004591	AGXT2	64902	XM_005248339	0	0	0	0	0	1	0	0	0	0	0	0	1
hsa-miR-124-5p	MIMAT0004591	AGXT2	64902	XM_005248338	0	0	0	0	0	1	0	0	0	0	0	0	1
hsa-miR-124-5p	MIMAT0004591	AGXT2	64902	XM_005248337	0	0	0	0	0	1	0	0	0	0	0	0	1
hsa-miR-124-5p	MIMAT0004591	AHCTF1	25909	NM_015446	0	0	0	0	0	0	0	0	0	0	1	0	1
hsa-miR-124-5p	MIMAT0004591	AHCY	191	XM_005260317	0	0	0	0	0	0	0	0	0	0	1	0	1
hsa-miR-124-5p	MIMAT0004591	AHCY	191	XM_005260315	0	0	0	0	0	0	0	0	0	0	1	0	1
hsa-miR-124-5p	MIMAT0004591	AHCY	191	NM_000687	0	0	0	0	0	0	0	0	0	0	1	0	1
hsa-miR-124-5p	MIMAT0004591	AHCY	191	XM_005260316	0	0	0	0	0	0	0	0	0	0	1	0	1
hsa-miR-124-5p	MIMAT0004591	AHCY	191	NM_001161766	0	0	0	0	0	0	0	0	0	0	1	0	1
hsa-miR-124-5p	MIMAT0004591	AHCYL1	10768	NM_001242673	0	1	0	0	0	1	0	0	0	0	1	0	3
hsa-miR-124-5p	MIMAT0004591	AHCYL1	10768	XM_005270388	0	0	0	0	0	1	0	0	0	0	1	0	2
hsa-miR-124-5p	MIMAT0004591	AHCYL1	10768	NM_001242674	0	0	0	0	0	1	0	0	0	0	1	0	2
hsa-miR-124-5p	MIMAT0004591	AHCYL1	10768	NM_006621	0	0	0	0	0	1	0	0	0	0	1	0	2
hsa-miR-124-5p	MIMAT0004591	AHCYL1	10768	NM_001242676	0	0	0	0	0	1	0	0	0	0	1	0	2
hsa-miR-124-5p	MIMAT0004591	AHCYL1	10768	NM_001242675	0	0	0	0	0	1	0	0	0	0	1	0	2
hsa-miR-124-5p	MIMAT0004591	AHCYL2	23382	NM_001130723	0	0	0	0	0	0	0	0	0	1	1	0	2
hsa-miR-124-5p	MIMAT0004591	AHCYL2	23382	NM_015328	0	0	0	0	0	0	0	0	0	1	1	0	2
hsa-miR-124-5p	MIMAT0004591	AHCYL2	23382	NM_001130722	0	0	0	0	0	0	0	0	0	0	1	0	1
hsa-miR-124-5p	MIMAT0004591	AHCYL2	23382	XM_005250237	0	0	0	0	0	0	0	0	0	0	1	0	1
hsa-miR-124-5p	MIMAT0004591	AHCYL2	23382	NM_001130720	0	0	0	0	0	0	0	0	0	0	1	0	1
hsa-miR-124-5p	MIMAT0004591	AHDC1	27245	XM_005245850	0	0	0	0	0	0	0	0	0	0	1	0	1
hsa-miR-124-5p	MIMAT0004591	AHDC1	27245	XM_005245852	0	0	0	0	0	0	0	0	0	0	1	0	1
hsa-miR-124-5p	MIMAT0004591	AHDC1	27245	XM_005245851	0	0	0	0	0	0	0	0	0	0	1	0	1
hsa-miR-124-5p	MIMAT0004591	AHDC1	27245	XM_005245848	0	0	0	0	0	0	0	0	0	0	1	0	1
hsa-miR-124-5p	MIMAT0004591	AHDC1	27245	NM_001029882	0	0	0	0	0	0	0	0	0	0	1	0	1
hsa-miR-124-5p	MIMAT0004591	AHDC1	27245	XM_005245849	0	0	0	0	0	0	0	0	0	0	1	0	1
hsa-miR-124-5p	MIMAT0004591	AHI1	54806	XM_005267039	0	0	0	0	0	0	0	0	0	1	1	0	2
hsa-miR-124-5p	MIMAT0004591	AHI1	54806	NM_001134830	0	0	0	0	0	0	0	0	0	0	1	0	1
hsa-miR-124-5p	MIMAT0004591	AHI1	54806	NM_017651	0	0	0	0	0	0	0	0	0	0	1	0	1
hsa-miR-124-5p	MIMAT0004591	AHI1	54806	NM_001134831	0	0	0	0	0	0	0	0	0	0	1	0	1
hsa-miR-124-5p	MIMAT0004591	AHNAK	79026	NM_001620	0	0	0	0	0	0	0	0	0	1	1	0	2
hsa-miR-124-5p	MIMAT0004591	AHNAK	79026	NM_024060	0	0	0	0	0	0	0	0	0	0	1	0	1
hsa-miR-124-5p	MIMAT0004591	AHNAK	79026	XM_005274246	0	0	0	0	0	0	0	0	0	0	1	0	1
hsa-miR-124-5p	MIMAT0004591	AHNAK	79026	XM_005274245	0	0	0	0	0	0	0	0	0	0	1	0	1
hsa-miR-124-5p	MIMAT0004591	AHNAK	79026	XM_005274242	0	0	0	0	0	0	0	0	0	0	1	0	1
hsa-miR-124-5p	MIMAT0004591	AHNAK	79026	XM_005274243	0	0	0	0	0	0	0	0	0	0	1	0	1
hsa-miR-124-5p	MIMAT0004591	AHNAK	79026	XM_005274244	0	0	0	0	0	0	0	0	0	0	1	0	1
hsa-miR-124-5p	MIMAT0004591	AHNAK	79026	XM_005274241	0	0	0	0	0	0	0	0	0	0	1	0	1
hsa-miR-124-5p	MIMAT0004591	AHNAK	79026	XM_005274240	0	0	0	0	0	0	0	0	0	0	1	0	1
hsa-miR-124-5p	MIMAT0004591	AHNAK2	113146	NM_138420	0	0	0	0	0	1	0	0	0	0	1	0	2
hsa-miR-124-5p	MIMAT0004591	AHNAK2	113146	XM_005267299	0	0	0	0	0	1	0	0	0	0	1	0	2
hsa-miR-124-5p	MIMAT0004591	AHR	196	NM_001621	0	0	0	0	0	0	0	0	0	0	1	0	1
hsa-miR-124-5p	MIMAT0004591	AHRR	57491	NM_020731	0	0	0	0	0	0	0	0	0	0	1	0	1
hsa-miR-124-5p	MIMAT0004591	AHRR	57491	NM_001242412	0	0	0	0	0	0	0	0	0	0	1	0	1
hsa-miR-124-5p	MIMAT0004591	AHSA1	10598	NM_012111	0	0	0	0	0	0	0	0	0	1	1	0	2
hsa-miR-124-5p	MIMAT0004591	AHSA2	130872	NM_152392	0	0	0	0	0	0	0	0	0	1	1	0	2
hsa-miR-124-5p	MIMAT0004591	AHSA2	130872	XM_005264148	0	0	0	0	0	0	0	0	0	0	1	0	1
hsa-miR-124-5p	MIMAT0004591	AHSA2	130872	XM_005264147	0	0	0	0	0	0	0	0	0	0	1	0	1
hsa-miR-124-5p	MIMAT0004591	AHSA2	130872	XM_005264146	0	0	0	0	0	0	0	0	0	0	1	0	1
hsa-miR-124-5p	MIMAT0004591	AHSA2	130872	XM_005264149	0	0	0	0	0	0	0	0	0	0	1	0	1
hsa-miR-124-5p	MIMAT0004591	AHSG	197	NM_001622	0	0	0	0	0	0	0	0	0	1	1	0	2
hsa-miR-124-5p	MIMAT0004591	AICDA	57379	NM_020661	1	1	1	0	0	1	0	0	0	1	1	1	7
hsa-miR-124-5p	MIMAT0004591	AICDA	57379	XM_005253432	0	0	0	0	0	1	0	0	0	0	1	0	2
hsa-miR-124-5p	MIMAT0004591	AIDA	64853	XM_005273232	0	0	0	0	0	0	0	0	0	1	1	0	2
hsa-miR-124-5p	MIMAT0004591	AIDA	64853	NM_022831	0	0	0	0	0	0	0	0	0	0	1	0	1
hsa-miR-124-5p	MIMAT0004591	AIF1	199	NM_004847	0	0	0	0	0	0	0	0	0	0	1	0	1
hsa-miR-124-5p	MIMAT0004591	AIF1L	83543	NM_001185095	0	0	0	0	0	0	0	0	0	0	1	0	1
hsa-miR-124-5p	MIMAT0004591	AIF1L	83543	NM_001185096	0	0	0	0	0	0	0	0	0	0	1	0	1
hsa-miR-124-5p	MIMAT0004591	AIF1L	83543	NM_031426	0	0	0	0	0	0	0	0	0	0	1	0	1
hsa-miR-124-5p	MIMAT0004591	AIFM1	9131	NM_001130847	0	0	0	0	0	0	0	0	0	1	1	0	2
hsa-miR-124-5p	MIMAT0004591	AIFM1	9131	NM_145813	0	0	0	0	0	0	0	0	0	0	1	0	1
hsa-miR-124-5p	MIMAT0004591	AIFM1	9131	NM_001130846	0	0	0	0	0	0	0	0	0	0	1	0	1
hsa-miR-124-5p	MIMAT0004591	AIFM1	9131	NM_145812	0	0	0	0	0	0	0	0	0	0	1	0	1
hsa-miR-124-5p	MIMAT0004591	AIFM1	9131	NM_004208	0	0	0	0	0	0	0	0	0	0	1	0	1
hsa-miR-124-5p	MIMAT0004591	AIFM2	84883	XM_005270249	0	0	0	0	0	1	0	0	0	1	1	0	3
hsa-miR-124-5p	MIMAT0004591	AIFM2	84883	XM_005270247	0	0	0	0	0	1	0	0	0	0	1	0	2
hsa-miR-124-5p	MIMAT0004591	AIFM2	84883	XM_005270246	0	0	0	0	0	1	0	0	0	0	1	0	2
hsa-miR-124-5p	MIMAT0004591	AIFM2	84883	XM_005270250	0	0	0	0	0	1	0	0	0	0	1	0	2
hsa-miR-124-5p	MIMAT0004591	AIFM2	84883	NM_032797	0	0	0	0	0	1	0	0	0	0	1	0	2
hsa-miR-124-5p	MIMAT0004591	AIFM2	84883	NM_001198696	0	0	0	0	0	1	0	0	0	0	1	0	2
hsa-miR-124-5p	MIMAT0004591	AIFM2	84883	XM_005270248	0	0	0	0	0	1	0	0	0	0	1	0	2
hsa-miR-124-5p	MIMAT0004591	AIFM3	150209	NM_001146288	0	0	0	0	0	0	0	0	0	0	1	0	1
hsa-miR-124-5p	MIMAT0004591	AIFM3	150209	NM_001018060	0	0	0	0	0	0	0	0	0	0	1	0	1
hsa-miR-124-5p	MIMAT0004591	AIFM3	150209	NM_144704	0	0	0	0	0	0	0	0	0	0	1	0	1
hsa-miR-124-5p	MIMAT0004591	AIG1	51390	XM_005267013	0	0	0	0	0	0	0	0	0	1	1	1	3
hsa-miR-124-5p	MIMAT0004591	AIG1	51390	XM_005267012	0	0	0	0	0	0	0	0	0	0	1	0	1
hsa-miR-124-5p	MIMAT0004591	AIG1	51390	XM_005267010	0	0	0	0	0	0	0	0	0	0	1	0	1
hsa-miR-124-5p	MIMAT0004591	AIG1	51390	XM_005267011	0	0	0	0	0	0	0	0	0	0	1	0	1
hsa-miR-124-5p	MIMAT0004591	AIG1	51390	NM_016108	0	0	0	0	0	0	0	0	0	0	1	0	1
hsa-miR-124-5p	MIMAT0004591	AIG1	51390	XM_005267014	0	0	0	0	0	0	0	0	0	0	1	0	1
hsa-miR-124-5p	MIMAT0004591	AIM1	202	XM_005266839	0	0	0	0	0	1	0	0	0	0	1	0	2
hsa-miR-124-5p	MIMAT0004591	AIM1	202	NM_001624	0	0	0	0	0	1	0	0	0	0	1	0	2
hsa-miR-124-5p	MIMAT0004591	AIM1L	55057	NM_001039775	0	0	0	0	0	0	0	0	0	0	1	0	1
hsa-miR-124-5p	MIMAT0004591	AIM1L	55057	XM_005245918	0	0	0	0	0	0	0	0	0	0	1	0	1
hsa-miR-124-5p	MIMAT0004591	AIM2	9447	NM_004833	0	0	0	0	0	0	0	0	0	0	1	0	1
hsa-miR-124-5p	MIMAT0004591	AIM2	9447	XM_005245618	0	0	0	0	0	0	0	0	0	0	1	0	1
hsa-miR-124-5p	MIMAT0004591	AIM2	9447	XM_005245617	0	0	0	0	0	0	0	0	0	0	1	0	1
hsa-miR-124-5p	MIMAT0004591	AIM2	9447	XM_005245616	0	0	0	0	0	0	0	0	0	0	1	0	1
hsa-miR-124-5p	MIMAT0004591	AIMP1	9255	NM_004757	0	0	1	0	1	1	0	0	0	1	1	1	6
hsa-miR-124-5p	MIMAT0004591	AIMP1	9255	NM_001142415	0	0	1	0	1	1	0	0	0	0	1	1	5
hsa-miR-124-5p	MIMAT0004591	AIMP1	9255	NM_001142416	0	0	1	0	1	1	0	0	0	0	1	1	5
hsa-miR-124-5p	MIMAT0004591	AIP	9049	NM_003977	0	0	0	0	0	0	0	0	0	0	1	0	1
hsa-miR-124-5p	MIMAT0004591	AIPL1	23746	XM_005256587	0	0	1	0	0	1	0	0	0	0	1	1	4
hsa-miR-124-5p	MIMAT0004591	AIPL1	23746	XM_005256586	0	0	0	0	0	1	0	0	0	0	1	0	2
hsa-miR-124-5p	MIMAT0004591	AIPL1	23746	XM_005256585	0	0	0	0	0	1	0	0	0	0	1	0	2
hsa-miR-124-5p	MIMAT0004591	AIPL1	23746	XM_005256584	0	0	0	0	0	1	0	0	0	0	1	0	2
hsa-miR-124-5p	MIMAT0004591	AIPL1	23746	XM_005256583	0	0	0	0	0	1	0	0	0	0	1	0	2
hsa-miR-124-5p	MIMAT0004591	AIPL1	23746	NM_001033054	0	0	0	0	0	1	0	0	0	0	1	0	2
hsa-miR-124-5p	MIMAT0004591	AIPL1	23746	NM_001033055	0	0	0	0	0	1	0	0	0	0	1	0	2
hsa-miR-124-5p	MIMAT0004591	AIPL1	23746	NM_014336	0	0	0	0	0	1	0	0	0	0	1	0	2
hsa-miR-124-5p	MIMAT0004591	AIRE	326	NM_000383	0	0	0	0	0	0	0	0	0	1	1	0	2
hsa-miR-124-5p	MIMAT0004591	AIRE	326	XM_005261110	0	0	0	0	0	0	0	0	0	0	1	0	1
hsa-miR-124-5p	MIMAT0004591	AJAP1	55966	NM_018836	0	0	0	0	0	0	0	0	0	1	1	0	2
hsa-miR-124-5p	MIMAT0004591	AJAP1	55966	NM_001042478	0	0	0	0	0	0	0	0	0	0	1	0	1
hsa-miR-124-5p	MIMAT0004591	AJUBA	84962	XM_005268131	0	0	0	0	0	0	0	0	0	0	1	1	2
hsa-miR-124-5p	MIMAT0004591	AJUBA	84962	XM_005268130	0	0	0	0	0	0	0	0	0	0	1	0	1
hsa-miR-124-5p	MIMAT0004591	AJUBA	84962	NM_032876	0	0	0	0	0	0	0	0	0	0	1	0	1
hsa-miR-124-5p	MIMAT0004591	AJUBA	84962	XM_005268132	0	0	0	0	0	0	0	0	0	0	1	0	1
hsa-miR-124-5p	MIMAT0004591	AJUBA	84962	NM_198086	0	0	0	0	0	0	0	0	0	0	1	0	1
hsa-miR-124-5p	MIMAT0004591	AK1	203	XM_005251788	0	0	0	0	0	1	0	0	0	1	1	0	3
hsa-miR-124-5p	MIMAT0004591	AK1	203	NM_000476	0	0	0	0	0	1	0	0	0	0	1	1	3
hsa-miR-124-5p	MIMAT0004591	AK1	203	XM_005251786	0	0	0	0	0	1	0	0	0	0	1	0	2
hsa-miR-124-5p	MIMAT0004591	AK1	203	XM_005251787	0	0	0	0	0	1	0	0	0	0	1	0	2
hsa-miR-124-5p	MIMAT0004591	AK2	204	XM_005270603	1	0	0	0	0	1	0	0	0	0	1	0	3
hsa-miR-124-5p	MIMAT0004591	AK2	204	NM_001625	1	0	0	0	0	1	0	0	0	0	1	0	3
hsa-miR-124-5p	MIMAT0004591	AK2	204	NM_001199199	0	0	0	0	0	1	0	0	0	0	1	1	3
hsa-miR-124-5p	MIMAT0004591	AK2	204	NM_013411	0	0	0	0	0	1	0	0	0	0	1	1	3
hsa-miR-124-5p	MIMAT0004591	AK2	204	XM_005270604	1	0	0	0	0	1	0	0	0	0	1	0	3
hsa-miR-124-5p	MIMAT0004591	AK2	204	XM_005270608	1	0	0	0	0	1	0	0	0	0	1	0	3
hsa-miR-124-5p	MIMAT0004591	AK2	204	XM_005270607	0	0	0	0	0	1	0	0	0	0	1	0	2
hsa-miR-124-5p	MIMAT0004591	AK3	50808	NM_016282	0	0	0	0	0	0	0	0	0	0	1	0	1
hsa-miR-124-5p	MIMAT0004591	AK3	50808	NM_001199853	0	0	0	0	0	0	0	0	0	0	1	0	1
hsa-miR-124-5p	MIMAT0004591	AK3	50808	NM_001199855	0	0	0	0	0	0	0	0	0	0	1	0	1
hsa-miR-124-5p	MIMAT0004591	AK3	50808	NM_001199856	0	0	0	0	0	0	0	0	0	0	1	0	1
hsa-miR-124-5p	MIMAT0004591	AK3	50808	NM_001199852	0	0	0	0	0	0	0	0	0	0	1	0	1
hsa-miR-124-5p	MIMAT0004591	AK4	205	NM_001005353	0	0	1	0	0	1	0	0	0	0	1	1	4
hsa-miR-124-5p	MIMAT0004591	AK4	205	NM_013410	0	0	1	0	0	1	0	0	0	0	1	1	4
hsa-miR-124-5p	MIMAT0004591	AK4	205	NM_203464	0	0	1	0	0	1	0	0	0	0	1	1	4
hsa-miR-124-5p	MIMAT0004591	AK5	26289	NM_012093	0	0	0	0	0	0	0	0	0	0	1	0	1
hsa-miR-124-5p	MIMAT0004591	AK5	26289	XM_005270739	0	0	0	0	0	0	0	0	0	0	1	0	1
hsa-miR-124-5p	MIMAT0004591	AK5	26289	NM_174858	0	0	0	0	0	0	0	0	0	0	1	0	1
hsa-miR-124-5p	MIMAT0004591	AK8	158067	NM_152572	0	0	0	0	0	0	0	0	0	0	1	0	1
hsa-miR-124-5p	MIMAT0004591	AK8	158067	XM_005272169	0	0	0	0	0	0	0	0	0	0	1	0	1
hsa-miR-124-5p	MIMAT0004591	AK9	221264	XM_005266859	1	0	0	0	0	0	0	0	0	1	1	0	3
hsa-miR-124-5p	MIMAT0004591	AK9	221264	NM_001145128	1	0	0	0	0	0	0	0	0	0	1	0	2
hsa-miR-124-5p	MIMAT0004591	AK9	221264	NM_145025	0	0	0	0	0	0	0	0	0	0	1	0	1
hsa-miR-124-5p	MIMAT0004591	AKAP1	8165	NM_001242903	0	0	0	0	0	0	0	0	0	0	1	0	1
hsa-miR-124-5p	MIMAT0004591	AKAP1	8165	XM_005257708	0	0	0	0	0	0	0	0	0	0	1	0	1
hsa-miR-124-5p	MIMAT0004591	AKAP1	8165	NM_003488	0	0	0	0	0	0	0	0	0	0	1	0	1
hsa-miR-124-5p	MIMAT0004591	AKAP1	8165	NM_001242902	0	0	0	0	0	0	0	0	0	0	1	0	1
hsa-miR-124-5p	MIMAT0004591	AKAP1	8165	XM_005257709	0	0	0	0	0	0	0	0	0	0	1	0	1
hsa-miR-124-5p	MIMAT0004591	AKAP1	8165	XM_005257707	0	0	0	0	0	0	0	0	0	0	1	0	1
hsa-miR-124-5p	MIMAT0004591	AKAP10	11216	NM_007202	0	0	0	0	0	0	0	0	0	0	1	0	1
hsa-miR-124-5p	MIMAT0004591	AKAP11	11215	NM_016248	0	0	0	0	0	0	0	0	0	1	1	0	2
hsa-miR-124-5p	MIMAT0004591	AKAP11	11215	XM_005266248	0	0	0	0	0	0	0	0	0	0	1	0	1
hsa-miR-124-5p	MIMAT0004591	AKAP11	11215	XM_005266247	0	0	0	0	0	0	0	0	0	0	1	0	1
hsa-miR-124-5p	MIMAT0004591	AKAP12	9590	XM_005267234	0	0	0	0	0	1	0	0	0	1	1	0	3
hsa-miR-124-5p	MIMAT0004591	AKAP12	9590	XM_005267235	0	0	0	0	0	1	0	0	0	0	1	0	2
hsa-miR-124-5p	MIMAT0004591	AKAP12	9590	NM_144497	0	0	0	0	0	1	0	0	0	0	1	0	2
hsa-miR-124-5p	MIMAT0004591	AKAP12	9590	XM_005267233	0	0	0	0	0	1	0	0	0	0	1	0	2
hsa-miR-124-5p	MIMAT0004591	AKAP12	9590	NM_005100	0	0	0	0	0	1	0	0	0	0	1	0	2
hsa-miR-124-5p	MIMAT0004591	AKAP13	11214	XM_005254839	0	1	0	0	0	1	0	0	0	1	1	1	5
hsa-miR-124-5p	MIMAT0004591	AKAP13	11214	NM_001270546	0	0	0	0	0	1	0	0	0	0	1	1	3
hsa-miR-124-5p	MIMAT0004591	AKAP13	11214	XM_005254854	0	0	0	0	0	1	0	0	0	0	1	1	3
hsa-miR-124-5p	MIMAT0004591	AKAP13	11214	XM_005254852	0	0	0	0	0	1	0	0	0	0	1	1	3
hsa-miR-124-5p	MIMAT0004591	AKAP13	11214	XM_005254851	0	0	0	0	0	1	0	0	0	0	1	1	3
hsa-miR-124-5p	MIMAT0004591	AKAP13	11214	XM_005254856	0	0	0	0	0	1	0	0	0	0	1	1	3
hsa-miR-124-5p	MIMAT0004591	AKAP13	11214	XM_005254855	0	0	0	0	0	1	0	0	0	0	1	1	3
hsa-miR-124-5p	MIMAT0004591	AKAP13	11214	XM_005254853	0	0	0	0	0	1	0	0	0	0	1	1	3
hsa-miR-124-5p	MIMAT0004591	AKAP13	11214	XM_005254850	0	0	0	0	0	1	0	0	0	0	1	1	3
hsa-miR-124-5p	MIMAT0004591	AKAP13	11214	XM_005254849	0	0	0	0	0	1	0	0	0	0	1	1	3
hsa-miR-124-5p	MIMAT0004591	AKAP13	11214	XM_005254848	0	0	0	0	0	1	0	0	0	0	1	1	3
hsa-miR-124-5p	MIMAT0004591	AKAP13	11214	XM_005254847	0	0	0	0	0	1	0	0	0	0	1	1	3
hsa-miR-124-5p	MIMAT0004591	AKAP13	11214	NM_007200	0	0	0	0	0	1	0	0	0	0	1	1	3
hsa-miR-124-5p	MIMAT0004591	AKAP13	11214	NM_006738	0	0	0	0	0	1	0	0	0	0	1	1	3
hsa-miR-124-5p	MIMAT0004591	AKAP13	11214	XM_005254846	0	0	0	0	0	1	0	0	0	0	1	1	3
hsa-miR-124-5p	MIMAT0004591	AKAP13	11214	XM_005254845	0	0	0	0	0	1	0	0	0	0	1	1	3
hsa-miR-124-5p	MIMAT0004591	AKAP13	11214	XM_005254844	0	0	0	0	0	1	0	0	0	0	1	1	3
hsa-miR-124-5p	MIMAT0004591	AKAP13	11214	XM_005254843	0	0	0	0	0	1	0	0	0	0	1	1	3
hsa-miR-124-5p	MIMAT0004591	AKAP13	11214	XM_005254842	0	0	0	0	0	1	0	0	0	0	1	1	3
hsa-miR-124-5p	MIMAT0004591	AKAP13	11214	XM_005254841	0	0	0	0	0	1	0	0	0	0	1	1	3
hsa-miR-124-5p	MIMAT0004591	AKAP13	11214	XM_005254840	0	0	0	0	0	1	0	0	0	0	1	1	3
hsa-miR-124-5p	MIMAT0004591	AKAP14	158798	NM_178813	0	0	0	0	0	0	0	0	0	0	1	0	1
hsa-miR-124-5p	MIMAT0004591	AKAP14	158798	NM_001008534	0	0	0	0	0	0	0	0	0	0	1	0	1
hsa-miR-124-5p	MIMAT0004591	AKAP17A	8227	NM_005088	0	0	0	0	0	0	0	0	0	0	1	0	1
hsa-miR-124-5p	MIMAT0004591	AKAP2	11217	NM_001198656	0	0	0	0	0	1	0	0	0	0	1	1	3
hsa-miR-124-5p	MIMAT0004591	AKAP2	11217	NM_001136562	0	0	0	0	0	1	0	0	0	0	1	1	3
hsa-miR-124-5p	MIMAT0004591	AKAP2	11217	NM_001004065	0	0	0	0	0	1	0	0	0	0	1	1	3
hsa-miR-124-5p	MIMAT0004591	AKAP3	10566	XM_005253664	0	0	0	0	0	0	0	0	0	0	1	0	1
hsa-miR-124-5p	MIMAT0004591	AKAP3	10566	NM_006422	0	0	0	0	0	0	0	0	0	0	1	0	1
hsa-miR-124-5p	MIMAT0004591	AKAP3	10566	NM_001278309	0	0	0	0	0	0	0	0	0	0	1	0	1
hsa-miR-124-5p	MIMAT0004591	AKAP3	10566	XM_005253665	0	0	0	0	0	0	0	0	0	0	1	0	1
hsa-miR-124-5p	MIMAT0004591	AKAP4	8852	NM_003886	0	0	0	0	0	0	0	0	0	0	1	0	1
hsa-miR-124-5p	MIMAT0004591	AKAP4	8852	NM_139289	0	0	0	0	0	0	0	0	0	0	1	0	1
hsa-miR-124-5p	MIMAT0004591	AKAP5	9495	NM_004857	1	0	0	0	0	0	0	0	0	0	1	0	2
hsa-miR-124-5p	MIMAT0004591	AKAP6	9472	NM_004274	1	0	1	0	0	0	0	0	0	1	1	1	5
hsa-miR-124-5p	MIMAT0004591	AKAP6	9472	XM_005268220	0	0	0	0	0	0	0	0	0	0	1	0	1
hsa-miR-124-5p	MIMAT0004591	AKAP6	9472	XM_005268219	0	0	0	0	0	0	0	0	0	0	1	0	1
hsa-miR-124-5p	MIMAT0004591	AKAP7	9465	NM_016377	1	0	0	0	0	0	0	0	0	0	1	0	2
hsa-miR-124-5p	MIMAT0004591	AKAP7	9465	XM_005267229	1	0	0	0	0	0	0	0	0	0	1	0	2
hsa-miR-124-5p	MIMAT0004591	AKAP7	9465	XM_005267228	1	0	0	0	0	0	0	0	0	0	1	0	2
hsa-miR-124-5p	MIMAT0004591	AKAP7	9465	NM_004842	1	0	0	0	0	0	0	0	0	0	1	0	2
hsa-miR-124-5p	MIMAT0004591	AKAP7	9465	NM_138633	1	0	0	0	0	0	0	0	0	0	1	0	2
hsa-miR-124-5p	MIMAT0004591	AKAP7	9465	XM_005267230	0	0	0	0	0	0	0	0	0	0	1	0	1
hsa-miR-124-5p	MIMAT0004591	AKAP8	10270	NM_005858	0	0	0	0	0	0	0	0	0	1	1	0	2
hsa-miR-124-5p	MIMAT0004591	AKAP8	10270	XM_005259707	0	0	0	0	0	0	0	0	0	0	1	0	1
hsa-miR-124-5p	MIMAT0004591	AKAP8	10270	XM_005259706	0	0	0	0	0	0	0	0	0	0	1	0	1
hsa-miR-124-5p	MIMAT0004591	AKAP9	10142	XM_005250102	0	0	1	0	0	1	0	0	0	0	1	1	4
hsa-miR-124-5p	MIMAT0004591	AKAP9	10142	NM_147185	0	0	1	0	0	1	0	0	0	0	1	1	4
hsa-miR-124-5p	MIMAT0004591	AKAP9	10142	NM_005751	0	0	1	0	0	1	0	0	0	0	1	1	4
hsa-miR-124-5p	MIMAT0004591	AKAP9	10142	XM_005250103	0	0	1	0	0	1	0	0	0	0	1	1	4
hsa-miR-124-5p	MIMAT0004591	AKIP1	56672	NM_020642	0	0	0	0	0	0	0	0	0	0	1	0	1
hsa-miR-124-5p	MIMAT0004591	AKIP1	56672	NM_001206648	0	0	0	0	0	0	0	0	0	0	1	0	1
hsa-miR-124-5p	MIMAT0004591	AKIP1	56672	NM_001206646	0	0	0	0	0	0	0	0	0	0	1	0	1
hsa-miR-124-5p	MIMAT0004591	AKIP1	56672	NM_001206647	0	0	0	0	0	0	0	0	0	0	1	0	1
hsa-miR-124-5p	MIMAT0004591	AKIRIN1	79647	NM_024595	0	0	0	0	0	1	0	0	0	1	1	0	3
hsa-miR-124-5p	MIMAT0004591	AKIRIN1	79647	XM_005271198	0	0	0	0	0	1	0	0	0	0	1	0	2
hsa-miR-124-5p	MIMAT0004591	AKIRIN1	79647	NM_001136275	0	0	0	0	0	1	0	0	0	0	1	0	2
hsa-miR-124-5p	MIMAT0004591	AKIRIN2	55122	NM_018064	0	0	0	0	0	0	0	0	0	1	1	0	2
hsa-miR-124-5p	MIMAT0004591	AKNA	80709	NM_030767	0	0	0	0	0	1	0	0	0	1	1	1	4
hsa-miR-124-5p	MIMAT0004591	AKNA	80709	XM_005252247	0	0	0	0	0	1	0	0	0	0	1	0	2
hsa-miR-124-5p	MIMAT0004591	AKNA	80709	XM_005252248	0	0	0	0	0	1	0	0	0	0	1	0	2
hsa-miR-124-5p	MIMAT0004591	AKNA	80709	XM_005252246	0	0	0	0	0	1	0	0	0	0	1	0	2
hsa-miR-124-5p	MIMAT0004591	AKNA	80709	XM_005252245	0	0	0	0	0	1	0	0	0	0	1	0	2
hsa-miR-124-5p	MIMAT0004591	AKNA	80709	XM_005252243	0	0	0	0	0	1	0	0	0	0	1	0	2
hsa-miR-124-5p	MIMAT0004591	AKNA	80709	XM_005252244	0	0	0	0	0	1	0	0	0	0	1	0	2
hsa-miR-124-5p	MIMAT0004591	AKR1A1	10327	NM_006066	0	0	0	0	0	0	0	0	0	0	1	0	1
hsa-miR-124-5p	MIMAT0004591	AKR1A1	10327	NM_001202413	0	0	0	0	0	0	0	0	0	0	1	0	1
hsa-miR-124-5p	MIMAT0004591	AKR1A1	10327	NM_153326	0	0	0	0	0	0	0	0	0	0	1	0	1
hsa-miR-124-5p	MIMAT0004591	AKR1A1	10327	NM_001202414	0	0	0	0	0	0	0	0	0	0	1	0	1
hsa-miR-124-5p	MIMAT0004591	AKR1B1	231	NM_001628	0	0	0	0	0	0	0	0	0	1	1	0	2
hsa-miR-124-5p	MIMAT0004591	AKR1B1	231	XM_005250234	0	0	0	0	0	0	0	0	0	0	1	0	1
hsa-miR-124-5p	MIMAT0004591	AKR1B10	57016	NM_020299	0	0	0	0	0	0	0	0	0	0	1	0	1
hsa-miR-124-5p	MIMAT0004591	AKR1B10	57016	XM_005250506	0	0	0	0	0	0	0	0	0	0	1	0	1
hsa-miR-124-5p	MIMAT0004591	AKR1B15	441282	XM_005250364	0	0	0	0	0	0	0	0	0	0	1	0	1
hsa-miR-124-5p	MIMAT0004591	AKR1B15	441282	XM_005250365	0	0	0	0	0	0	0	0	0	0	1	0	1
hsa-miR-124-5p	MIMAT0004591	AKR1B15	441282	NM_001080538	0	0	0	0	0	0	0	0	0	0	1	0	1
hsa-miR-124-5p	MIMAT0004591	AKR1C1	1645	NM_001353	0	0	0	0	0	0	0	0	0	0	1	0	1
hsa-miR-124-5p	MIMAT0004591	AKR1C2	1646	NM_001354	1	0	0	0	0	1	0	0	0	0	1	0	3
hsa-miR-124-5p	MIMAT0004591	AKR1C2	1646	NM_205845	1	0	0	0	0	1	0	0	0	0	1	0	3
hsa-miR-124-5p	MIMAT0004591	AKR1C2	1646	NM_001135241	0	0	0	0	0	1	0	0	0	0	1	0	2
hsa-miR-124-5p	MIMAT0004591	AKR1C2	1646	XM_005252371	0	0	0	0	0	1	0	0	0	0	1	0	2
hsa-miR-124-5p	MIMAT0004591	AKR1C2	1646	XM_005277676	0	0	0	0	0	1	0	0	0	0	1	0	2
hsa-miR-124-5p	MIMAT0004591	AKR1C3	8644	XM_005252637	0	0	0	0	0	0	0	0	0	0	1	0	1
hsa-miR-124-5p	MIMAT0004591	AKR1C3	8644	XM_005277677	0	0	0	0	0	0	0	0	0	0	1	0	1
hsa-miR-124-5p	MIMAT0004591	AKR1C3	8644	NM_001253909	0	0	0	0	0	0	0	0	0	0	1	0	1
hsa-miR-124-5p	MIMAT0004591	AKR1C3	8644	NM_001253908	0	0	0	0	0	0	0	0	0	0	1	0	1
hsa-miR-124-5p	MIMAT0004591	AKR1C3	8644	NM_003739	0	0	0	0	0	0	0	0	0	0	1	0	1
hsa-miR-124-5p	MIMAT0004591	AKR1C4	1109	NM_001818	0	0	0	0	0	0	0	0	0	0	1	0	1
hsa-miR-124-5p	MIMAT0004591	AKR1D1	6718	NM_005989	0	0	0	0	0	0	0	0	0	0	1	0	1
hsa-miR-124-5p	MIMAT0004591	AKR1D1	6718	NM_001190906	0	0	0	0	0	0	0	0	0	0	1	0	1
hsa-miR-124-5p	MIMAT0004591	AKR1D1	6718	NM_001190907	0	0	0	0	0	0	0	0	0	0	1	0	1
hsa-miR-124-5p	MIMAT0004591	AKR1E2	83592	NM_001040177	0	0	0	0	0	0	0	0	0	0	1	0	1
hsa-miR-124-5p	MIMAT0004591	AKR1E2	83592	NM_001271025	0	0	0	0	0	0	0	0	0	0	1	0	1
hsa-miR-124-5p	MIMAT0004591	AKR1E2	83592	NM_001271021	0	0	0	0	0	0	0	0	0	0	1	0	1
hsa-miR-124-5p	MIMAT0004591	AKR7A2	8574	NM_003689	1	0	0	0	0	0	0	0	0	0	1	0	2
hsa-miR-124-5p	MIMAT0004591	AKR7A2	8574	XM_005246023	1	0	0	0	0	0	0	0	0	0	1	0	2
hsa-miR-124-5p	MIMAT0004591	AKR7A3	22977	NM_012067	0	0	0	0	0	0	0	0	0	0	1	0	1
hsa-miR-124-5p	MIMAT0004591	AKT1	207	NM_005163	0	0	0	0	0	0	0	0	0	0	1	0	1
hsa-miR-124-5p	MIMAT0004591	AKT1	207	XM_005267402	0	0	0	0	0	0	0	0	0	0	1	0	1
hsa-miR-124-5p	MIMAT0004591	AKT1	207	NM_001014431	0	0	0	0	0	0	0	0	0	0	1	0	1
hsa-miR-124-5p	MIMAT0004591	AKT1	207	NM_001014432	0	0	0	0	0	0	0	0	0	0	1	0	1
hsa-miR-124-5p	MIMAT0004591	AKT1	207	XM_005267401	0	0	0	0	0	0	0	0	0	0	1	0	1
hsa-miR-124-5p	MIMAT0004591	AKT1S1	84335	NM_032375	0	0	0	0	0	0	0	0	0	0	1	0	1
hsa-miR-124-5p	MIMAT0004591	AKT1S1	84335	NM_001098633	0	0	0	0	0	0	0	0	0	0	1	0	1
hsa-miR-124-5p	MIMAT0004591	AKT1S1	84335	NM_001278160	0	0	0	0	0	0	0	0	0	0	1	0	1
hsa-miR-124-5p	MIMAT0004591	AKT1S1	84335	NM_001098632	0	0	0	0	0	0	0	0	0	0	1	0	1
hsa-miR-124-5p	MIMAT0004591	AKT1S1	84335	NM_001278159	0	0	0	0	0	0	0	0	0	0	1	0	1
hsa-miR-124-5p	MIMAT0004591	AKT2	208	NM_001626	0	0	0	0	0	1	0	0	0	1	1	0	3
hsa-miR-124-5p	MIMAT0004591	AKT2	208	XM_005258645	0	0	0	0	0	1	0	0	0	0	1	0	2
hsa-miR-124-5p	MIMAT0004591	AKT2	208	XM_005258648	0	0	0	0	0	1	0	0	0	0	1	0	2
hsa-miR-124-5p	MIMAT0004591	AKT2	208	XM_005258646	0	0	0	0	0	1	0	0	0	0	1	0	2
hsa-miR-124-5p	MIMAT0004591	AKT2	208	XM_005258650	0	0	0	0	0	1	0	0	0	0	1	0	2
hsa-miR-124-5p	MIMAT0004591	AKT2	208	XM_005258649	0	0	0	0	0	1	0	0	0	0	1	0	2
hsa-miR-124-5p	MIMAT0004591	AKT2	208	XM_005258647	0	0	0	0	0	1	0	0	0	0	1	0	2
hsa-miR-124-5p	MIMAT0004591	AKT2	208	NM_001243028	0	0	0	0	0	1	0	0	0	0	1	0	2
hsa-miR-124-5p	MIMAT0004591	AKT2	208	NM_001243027	0	0	0	0	0	1	0	0	0	0	1	0	2
hsa-miR-124-5p	MIMAT0004591	AKT3	10000	XM_005272995	0	1	1	0	0	1	0	0	0	0	1	1	5
hsa-miR-124-5p	MIMAT0004591	AKT3	10000	NM_005465	0	0	1	0	1	1	0	0	0	0	1	1	5
hsa-miR-124-5p	MIMAT0004591	AKT3	10000	XM_005272997	0	0	1	0	0	1	0	0	0	0	1	1	4
hsa-miR-124-5p	MIMAT0004591	AKT3	10000	XM_005272996	0	0	1	0	0	1	0	0	0	0	1	1	4
hsa-miR-124-5p	MIMAT0004591	AKT3	10000	XM_005272994	0	0	1	0	0	1	0	0	0	0	1	1	4
hsa-miR-124-5p	MIMAT0004591	AKT3	10000	NM_001206729	0	0	0	0	0	1	0	0	0	0	0	0	1
hsa-miR-124-5p	MIMAT0004591	AKT3	10000	NM_181690	0	0	0	0	0	1	0	0	0	0	0	0	1
hsa-miR-124-5p	MIMAT0004591	AKTIP	64400	NM_001012398	1	0	0	0	0	1	0	0	0	0	1	0	3
hsa-miR-124-5p	MIMAT0004591	AKTIP	64400	XM_005256098	1	0	0	0	0	1	0	0	0	0	1	0	3
hsa-miR-124-5p	MIMAT0004591	AKTIP	64400	XM_005256096	1	0	0	0	0	1	0	0	0	0	1	0	3
hsa-miR-124-5p	MIMAT0004591	AKTIP	64400	XM_005256094	1	0	0	0	0	1	0	0	0	0	1	0	3
hsa-miR-124-5p	MIMAT0004591	AKTIP	64400	XM_005256097	1	0	0	0	0	1	0	0	0	0	1	0	3
hsa-miR-124-5p	MIMAT0004591	AKTIP	64400	XM_005256095	1	0	0	0	0	1	0	0	0	0	1	0	3
hsa-miR-124-5p	MIMAT0004591	AKTIP	64400	NM_022476	1	0	0	0	0	1	0	0	0	0	1	0	3
hsa-miR-124-5p	MIMAT0004591	ALAD	210	XM_005251799	0	0	0	0	0	1	0	0	0	0	1	0	2
hsa-miR-124-5p	MIMAT0004591	ALAD	210	NM_000031	0	0	0	0	0	1	0	0	0	0	1	0	2
hsa-miR-124-5p	MIMAT0004591	ALAS1	211	NM_000688	0	0	0	0	0	0	0	0	0	1	0	0	1
hsa-miR-124-5p	MIMAT0004591	ALCAM	214	NM_001627	0	0	0	0	0	1	0	0	0	1	1	0	3
hsa-miR-124-5p	MIMAT0004591	ALCAM	214	NM_001243283	0	0	0	0	0	1	0	0	0	0	1	0	2
hsa-miR-124-5p	MIMAT0004591	ALCAM	214	NM_001243281	0	0	0	0	0	1	0	0	0	0	1	0	2
hsa-miR-124-5p	MIMAT0004591	ALCAM	214	NM_001243280	0	0	0	0	0	1	0	0	0	0	1	0	2
hsa-miR-124-5p	MIMAT0004591	ALDH16A1	126133	NM_153329	0	0	0	0	0	0	0	0	0	1	1	0	2
hsa-miR-124-5p	MIMAT0004591	ALDH16A1	126133	NM_001145396	0	0	0	0	0	0	0	0	0	0	1	0	1
hsa-miR-124-5p	MIMAT0004591	ALDH18A1	5832	NM_002860	0	0	0	0	0	0	0	0	0	0	1	0	1
hsa-miR-124-5p	MIMAT0004591	ALDH18A1	5832	XM_005270012	0	0	0	0	0	0	0	0	0	0	1	0	1
hsa-miR-124-5p	MIMAT0004591	ALDH18A1	5832	XM_005270011	0	0	0	0	0	0	0	0	0	0	1	0	1
hsa-miR-124-5p	MIMAT0004591	ALDH18A1	5832	NM_001017423	0	0	0	0	0	0	0	0	0	0	1	0	1
hsa-miR-124-5p	MIMAT0004591	ALDH1A1	216	NM_000689	0	0	0	0	0	0	0	0	0	0	1	0	1
hsa-miR-124-5p	MIMAT0004591	ALDH1A1	216	XM_005251801	0	0	0	0	0	0	0	0	0	0	1	0	1
hsa-miR-124-5p	MIMAT0004591	ALDH1A1	216	XM_005251800	0	0	0	0	0	0	0	0	0	0	1	0	1
hsa-miR-124-5p	MIMAT0004591	ALDH1A2	8854	NM_001206897	0	0	0	0	0	0	0	0	0	1	1	0	2
hsa-miR-124-5p	MIMAT0004591	ALDH1A2	8854	NM_170697	0	0	0	0	0	0	0	0	0	0	1	0	1
hsa-miR-124-5p	MIMAT0004591	ALDH1A2	8854	NM_170696	0	0	0	0	0	0	0	0	0	0	1	0	1
hsa-miR-124-5p	MIMAT0004591	ALDH1A2	8854	NM_003888	0	0	0	0	0	0	0	0	0	0	1	0	1
hsa-miR-124-5p	MIMAT0004591	ALDH1A3	220	NM_000693	0	0	0	0	0	0	0	0	0	0	1	0	1
hsa-miR-124-5p	MIMAT0004591	ALDH1A3	220	XM_005254876	0	0	0	0	0	0	0	0	0	0	1	0	1
hsa-miR-124-5p	MIMAT0004591	ALDH1A3	220	XM_005254875	0	0	0	0	0	0	0	0	0	0	1	0	1
hsa-miR-124-5p	MIMAT0004591	ALDH1B1	219	NM_000692	0	0	0	0	0	1	0	0	0	1	1	1	4
hsa-miR-124-5p	MIMAT0004591	ALDH1B1	219	XM_005251406	0	0	0	0	0	1	0	0	0	0	1	1	3
hsa-miR-124-5p	MIMAT0004591	ALDH1L1	10840	NM_012190	0	0	0	0	0	1	0	0	0	1	1	0	3
hsa-miR-124-5p	MIMAT0004591	ALDH1L1	10840	NM_001270365	0	0	0	0	0	1	0	0	0	0	1	0	2
hsa-miR-124-5p	MIMAT0004591	ALDH1L1	10840	NM_001270364	0	0	0	0	0	1	0	0	0	0	1	0	2
hsa-miR-124-5p	MIMAT0004591	ALDH1L2	160428	NM_001034173	0	0	1	0	0	1	0	0	0	1	1	1	5
hsa-miR-124-5p	MIMAT0004591	ALDH2	217	NM_000690	0	0	0	0	0	0	0	0	0	0	1	0	1
hsa-miR-124-5p	MIMAT0004591	ALDH2	217	NM_001204889	0	0	0	0	0	0	0	0	0	0	1	0	1
hsa-miR-124-5p	MIMAT0004591	ALDH3A1	218	XM_005256526	0	0	0	0	0	0	0	0	0	0	1	0	1
hsa-miR-124-5p	MIMAT0004591	ALDH3A1	218	NM_001135167	0	0	0	0	0	0	0	0	0	0	1	0	1
hsa-miR-124-5p	MIMAT0004591	ALDH3A1	218	NM_000691	0	0	0	0	0	0	0	0	0	0	1	0	1
hsa-miR-124-5p	MIMAT0004591	ALDH3A1	218	NM_001135168	0	0	0	0	0	0	0	0	0	0	1	0	1
hsa-miR-124-5p	MIMAT0004591	ALDH3A1	218	XM_005256525	0	0	0	0	0	0	0	0	0	0	1	0	1
hsa-miR-124-5p	MIMAT0004591	ALDH3A1	218	XM_005256524	0	0	0	0	0	0	0	0	0	0	1	0	1
hsa-miR-124-5p	MIMAT0004591	ALDH3A1	218	XM_005256522	0	0	0	0	0	0	0	0	0	0	1	0	1
hsa-miR-124-5p	MIMAT0004591	ALDH3A1	218	XM_005256523	0	0	0	0	0	0	0	0	0	0	1	0	1
hsa-miR-124-5p	MIMAT0004591	ALDH3A2	224	NM_001031806	0	0	0	0	0	0	0	0	0	0	1	0	1
hsa-miR-124-5p	MIMAT0004591	ALDH3A2	224	NM_000382	0	0	0	0	0	0	0	0	0	0	1	0	1
hsa-miR-124-5p	MIMAT0004591	ALDH3B1	221	NM_001161473	0	0	0	0	0	0	0	0	0	0	1	0	1
hsa-miR-124-5p	MIMAT0004591	ALDH3B1	221	NM_001030010	0	0	0	0	0	0	0	0	0	0	1	0	1
hsa-miR-124-5p	MIMAT0004591	ALDH3B1	221	NM_000694	0	0	0	0	0	0	0	0	0	0	1	0	1
hsa-miR-124-5p	MIMAT0004591	ALDH3B2	222	NM_000695	0	0	0	0	0	0	0	0	0	0	1	0	1
hsa-miR-124-5p	MIMAT0004591	ALDH3B2	222	NM_001031615	0	0	0	0	0	0	0	0	0	0	1	0	1
hsa-miR-124-5p	MIMAT0004591	ALDH4A1	8659	NM_003748	0	0	0	0	0	0	0	0	0	1	1	0	2
hsa-miR-124-5p	MIMAT0004591	ALDH4A1	8659	NM_170726	0	0	0	0	0	0	0	0	0	0	1	0	1
hsa-miR-124-5p	MIMAT0004591	ALDH4A1	8659	XM_005246026	0	0	0	0	0	0	0	0	0	0	1	0	1
hsa-miR-124-5p	MIMAT0004591	ALDH4A1	8659	XM_005246025	0	0	0	0	0	0	0	0	0	0	1	0	1
hsa-miR-124-5p	MIMAT0004591	ALDH4A1	8659	NM_001161504	0	0	0	0	0	0	0	0	0	0	1	0	1
hsa-miR-124-5p	MIMAT0004591	ALDH5A1	7915	NM_170740	1	0	0	0	0	0	0	0	0	1	1	0	3
hsa-miR-124-5p	MIMAT0004591	ALDH5A1	7915	NM_001080	1	0	0	0	0	0	0	0	0	0	1	0	2
hsa-miR-124-5p	MIMAT0004591	ALDH6A1	4329	NM_001278594	0	0	0	0	0	0	0	0	0	0	1	0	1
hsa-miR-124-5p	MIMAT0004591	ALDH6A1	4329	NM_001278593	0	0	0	0	0	0	0	0	0	0	1	0	1
hsa-miR-124-5p	MIMAT0004591	ALDH6A1	4329	NM_005589	0	0	0	0	0	0	0	0	0	0	1	0	1
hsa-miR-124-5p	MIMAT0004591	ALDH7A1	501	NM_001182	1	0	0	0	0	1	0	0	0	1	1	0	4
hsa-miR-124-5p	MIMAT0004591	ALDH7A1	501	NM_001201377	1	0	0	0	0	1	0	0	0	1	1	0	4
hsa-miR-124-5p	MIMAT0004591	ALDH7A1	501	NM_001202404	1	0	0	0	0	1	0	0	0	0	1	0	3
hsa-miR-124-5p	MIMAT0004591	ALDH7A1	501	XM_005271993	0	0	0	0	0	1	0	0	0	0	1	0	2
hsa-miR-124-5p	MIMAT0004591	ALDH7A1	501	XM_005271994	0	0	0	0	0	1	0	0	0	0	0	0	1
hsa-miR-124-5p	MIMAT0004591	ALDH8A1	64577	NM_022568	0	1	0	0	0	0	0	0	0	1	1	0	3
hsa-miR-124-5p	MIMAT0004591	ALDH8A1	64577	NM_170771	0	0	0	0	0	0	0	0	0	0	1	0	1
hsa-miR-124-5p	MIMAT0004591	ALDH8A1	64577	NM_001193480	0	0	0	0	0	0	0	0	0	0	1	0	1
hsa-miR-124-5p	MIMAT0004591	ALDH9A1	223	XM_005244965	1	0	0	0	0	0	0	0	0	0	1	0	2
hsa-miR-124-5p	MIMAT0004591	ALDH9A1	223	XM_005244964	1	0	0	0	0	0	0	0	0	0	1	0	2
hsa-miR-124-5p	MIMAT0004591	ALDH9A1	223	NM_000696	1	0	0	0	0	0	0	0	0	0	1	0	2
hsa-miR-124-5p	MIMAT0004591	ALDOA	226	NM_000034	0	0	0	0	0	0	0	0	0	0	1	0	1
hsa-miR-124-5p	MIMAT0004591	ALDOA	226	NM_184043	0	0	0	0	0	0	0	0	0	0	1	0	1
hsa-miR-124-5p	MIMAT0004591	ALDOA	226	NM_184041	0	0	0	0	0	0	0	0	0	0	1	0	1
hsa-miR-124-5p	MIMAT0004591	ALDOA	226	NM_001127617	0	0	0	0	0	0	0	0	0	0	1	0	1
hsa-miR-124-5p	MIMAT0004591	ALDOA	226	NM_001243177	0	0	0	0	0	0	0	0	0	0	1	0	1
hsa-miR-124-5p	MIMAT0004591	ALDOA	226	XM_005255170	0	0	0	0	0	0	0	0	0	0	1	0	1
hsa-miR-124-5p	MIMAT0004591	ALDOB	229	NM_000035	0	0	0	0	0	0	0	0	0	0	1	0	1
hsa-miR-124-5p	MIMAT0004591	ALDOB	229	XM_005251810	0	0	0	0	0	0	0	0	0	0	1	0	1
hsa-miR-124-5p	MIMAT0004591	ALDOC	230	XM_005257947	0	0	0	0	0	0	0	0	0	0	1	0	1
hsa-miR-124-5p	MIMAT0004591	ALDOC	230	NM_005165	0	0	0	0	0	0	0	0	0	0	1	0	1
hsa-miR-124-5p	MIMAT0004591	ALDOC	230	XM_005257949	0	0	0	0	0	0	0	0	0	0	1	0	1
hsa-miR-124-5p	MIMAT0004591	ALDOC	230	XM_005257948	0	0	0	0	0	0	0	0	0	0	1	0	1
hsa-miR-124-5p	MIMAT0004591	ALG1	56052	XM_005255431	0	0	0	0	0	0	0	0	0	0	1	0	1
hsa-miR-124-5p	MIMAT0004591	ALG1	56052	XM_005255430	0	0	0	0	0	0	0	0	0	0	1	0	1
hsa-miR-124-5p	MIMAT0004591	ALG1	56052	NM_019109	0	0	0	0	0	0	0	0	0	0	1	0	1
hsa-miR-124-5p	MIMAT0004591	ALG10	84920	NM_032834	0	0	0	0	0	0	0	0	0	0	1	0	1
hsa-miR-124-5p	MIMAT0004591	ALG10B	144245	NM_001013620	0	0	1	0	0	0	0	0	0	0	1	1	3
hsa-miR-124-5p	MIMAT0004591	ALG10B	144245	XM_005268665	0	0	0	0	0	0	0	0	0	0	1	0	1
hsa-miR-124-5p	MIMAT0004591	ALG11	440138	NM_001004127	1	0	0	0	0	0	0	0	0	0	1	0	2
hsa-miR-124-5p	MIMAT0004591	ALG12	79087	NM_024105	0	0	0	0	0	0	0	0	0	0	1	0	1
hsa-miR-124-5p	MIMAT0004591	ALG13	79868	NM_001257231	0	0	0	0	0	0	0	0	0	0	1	0	1
hsa-miR-124-5p	MIMAT0004591	ALG13	79868	XM_005262191	0	0	0	0	0	0	0	0	0	0	1	0	1
hsa-miR-124-5p	MIMAT0004591	ALG13	79868	NM_001257230	0	0	0	0	0	0	0	0	0	0	1	0	1
hsa-miR-124-5p	MIMAT0004591	ALG13	79868	NM_001257234	0	0	0	0	0	0	0	0	0	0	1	0	1
hsa-miR-124-5p	MIMAT0004591	ALG13	79868	NM_001257237	0	0	0	0	0	0	0	0	0	0	1	0	1
hsa-miR-124-5p	MIMAT0004591	ALG13	79868	NM_001099922	0	0	0	0	0	0	0	0	0	0	1	0	1
hsa-miR-124-5p	MIMAT0004591	ALG13	79868	NM_001039210	0	0	0	0	0	0	0	0	0	0	1	0	1
hsa-miR-124-5p	MIMAT0004591	ALG13	79868	NM_001257235	0	0	0	0	0	0	0	0	0	0	1	0	1
hsa-miR-124-5p	MIMAT0004591	ALG13	79868	NM_001257239	0	0	0	0	0	0	0	0	0	0	1	0	1
hsa-miR-124-5p	MIMAT0004591	ALG13	79868	NM_018466	0	0	0	0	0	0	0	0	0	0	1	0	1
hsa-miR-124-5p	MIMAT0004591	ALG13	79868	NM_001257241	0	0	0	0	0	0	0	0	0	0	1	0	1
hsa-miR-124-5p	MIMAT0004591	ALG13	79868	NM_001168385	0	0	0	0	0	0	0	0	0	0	1	0	1
hsa-miR-124-5p	MIMAT0004591	ALG13	79868	NM_001257240	0	0	0	0	0	0	0	0	0	0	1	0	1
hsa-miR-124-5p	MIMAT0004591	ALG1L	200810	XM_005247203	0	0	0	0	0	0	0	0	0	0	1	0	1
hsa-miR-124-5p	MIMAT0004591	ALG1L	200810	XM_005247202	0	0	0	0	0	0	0	0	0	0	1	0	1
hsa-miR-124-5p	MIMAT0004591	ALG1L2	644974	NM_001136152	0	0	0	0	0	0	0	0	0	0	1	0	1
hsa-miR-124-5p	MIMAT0004591	ALG2	85365	NM_033087	0	0	0	0	0	0	0	0	0	0	1	0	1
hsa-miR-124-5p	MIMAT0004591	ALG3	10195	NM_001006941	0	1	0	0	0	0	0	0	0	0	1	0	2
hsa-miR-124-5p	MIMAT0004591	ALG3	10195	NM_005787	0	0	0	0	0	0	0	0	0	0	1	0	1
hsa-miR-124-5p	MIMAT0004591	ALG5	29880	NM_013338	0	0	0	0	0	0	0	0	0	0	1	0	1
hsa-miR-124-5p	MIMAT0004591	ALG5	29880	NM_001142364	0	0	0	0	0	0	0	0	0	0	1	0	1
hsa-miR-124-5p	MIMAT0004591	ALG6	29929	NM_013339	1	0	0	0	0	0	0	0	0	0	1	0	2
hsa-miR-124-5p	MIMAT0004591	ALG6	29929	XM_005270788	1	0	0	0	0	0	0	0	0	0	0	0	1
hsa-miR-124-5p	MIMAT0004591	ALG9	79796	NM_001077691	0	0	1	0	0	0	0	0	0	0	1	1	3
hsa-miR-124-5p	MIMAT0004591	ALG9	79796	XM_005277724	0	0	1	0	0	0	0	0	0	0	1	1	3
hsa-miR-124-5p	MIMAT0004591	ALG9	79796	XM_005277723	0	0	1	0	0	0	0	0	0	0	1	1	3
hsa-miR-124-5p	MIMAT0004591	ALG9	79796	XM_005277725	0	0	1	0	0	0	0	0	0	0	1	1	3
hsa-miR-124-5p	MIMAT0004591	ALG9	79796	NM_001077690	0	0	1	0	0	0	0	0	0	0	1	1	3
hsa-miR-124-5p	MIMAT0004591	ALG9	79796	NM_024740	0	0	1	0	0	0	0	0	0	0	1	1	3
hsa-miR-124-5p	MIMAT0004591	ALG9	79796	NM_001077692	0	0	1	0	0	0	0	0	0	0	1	1	3
hsa-miR-124-5p	MIMAT0004591	ALK	238	NM_004304	0	0	0	0	0	0	0	0	0	0	1	0	1
hsa-miR-124-5p	MIMAT0004591	ALKBH1	8846	NM_006020	1	0	0	0	0	0	0	0	0	0	1	0	2
hsa-miR-124-5p	MIMAT0004591	ALKBH4	54784	NM_017621	1	0	0	0	0	0	0	0	0	1	1	0	3
hsa-miR-124-5p	MIMAT0004591	ALKBH4	54784	XM_005250464	1	0	0	0	0	0	0	0	0	0	1	0	2
hsa-miR-124-5p	MIMAT0004591	ALKBH4	54784	XM_005250465	1	0	0	0	0	0	0	0	0	0	1	0	2
hsa-miR-124-5p	MIMAT0004591	ALKBH5	54890	NM_017758	0	0	0	0	0	0	0	0	0	0	1	0	1
hsa-miR-124-5p	MIMAT0004591	ALKBH6	84964	NM_198867	0	0	0	0	0	0	0	0	0	0	1	0	1
hsa-miR-124-5p	MIMAT0004591	ALKBH7	84266	NM_032306	0	0	0	0	0	0	0	0	0	0	1	0	1
hsa-miR-124-5p	MIMAT0004591	ALKBH7	84266	XM_005259658	0	0	0	0	0	0	0	0	0	0	1	0	1
hsa-miR-124-5p	MIMAT0004591	ALKBH8	91801	NM_138775	0	0	1	0	0	1	0	0	0	0	1	1	4
hsa-miR-124-5p	MIMAT0004591	ALKBH8	91801	XM_005271731	0	0	1	0	0	1	0	0	0	0	1	1	4
hsa-miR-124-5p	MIMAT0004591	ALKBH8	91801	XM_005271730	0	0	1	0	0	1	0	0	0	0	1	1	4
hsa-miR-124-5p	MIMAT0004591	ALKBH8	91801	XM_005271729	0	0	1	0	0	1	0	0	0	0	1	1	4
hsa-miR-124-5p	MIMAT0004591	ALKBH8	91801	XM_005271727	0	0	1	0	0	1	0	0	0	0	1	1	4
hsa-miR-124-5p	MIMAT0004591	ALKBH8	91801	XM_005271728	0	0	1	0	0	1	0	0	0	0	1	1	4
hsa-miR-124-5p	MIMAT0004591	ALKBH8	91801	XM_005271732	0	0	0	0	0	1	0	0	0	0	1	0	2
hsa-miR-124-5p	MIMAT0004591	ALLC	55821	NM_018436	0	1	1	0	0	1	0	0	0	1	1	1	6
hsa-miR-124-5p	MIMAT0004591	ALLC	55821	XM_005263851	0	0	1	0	0	1	0	0	0	0	1	1	4
hsa-miR-124-5p	MIMAT0004591	ALMS1	7840	NM_015120	0	1	0	0	0	0	0	0	0	0	0	0	1
hsa-miR-124-5p	MIMAT0004591	ALOX12	239	NM_000697	0	0	0	0	0	0	0	0	0	1	1	0	2
hsa-miR-124-5p	MIMAT0004591	ALOX12B	242	NM_001139	0	0	0	0	0	0	0	0	0	0	1	0	1
hsa-miR-124-5p	MIMAT0004591	ALOX15	246	XM_005256589	0	1	1	0	0	1	0	0	0	1	1	1	6
hsa-miR-124-5p	MIMAT0004591	ALOX15	246	XM_005256590	0	0	1	0	0	1	0	0	0	0	1	1	4
hsa-miR-124-5p	MIMAT0004591	ALOX15	246	NM_001140	0	0	1	0	0	1	0	0	0	0	1	1	4
hsa-miR-124-5p	MIMAT0004591	ALOX15B	247	NM_001141	0	0	0	0	0	0	0	0	0	0	1	1	2
hsa-miR-124-5p	MIMAT0004591	ALOX15B	247	NM_001039131	0	0	0	0	0	0	0	0	0	0	1	1	2
hsa-miR-124-5p	MIMAT0004591	ALOX15B	247	NM_001039130	0	0	0	0	0	0	0	0	0	0	1	1	2
hsa-miR-124-5p	MIMAT0004591	ALOX15B	247	XM_005256591	0	0	0	0	0	0	0	0	0	0	1	1	2
hsa-miR-124-5p	MIMAT0004591	ALOX5	240	XM_005271810	0	0	0	0	0	0	0	0	0	0	1	0	1
hsa-miR-124-5p	MIMAT0004591	ALOX5	240	XM_005276864	0	0	0	0	0	0	0	0	0	0	1	0	1
hsa-miR-124-5p	MIMAT0004591	ALOX5AP	241	NM_001204406	0	0	0	0	0	0	0	0	0	0	1	0	1
hsa-miR-124-5p	MIMAT0004591	ALOX5AP	241	NM_001629	0	0	0	0	0	0	0	0	0	0	1	0	1
hsa-miR-124-5p	MIMAT0004591	ALOXE3	59344	NM_001165960	0	0	0	0	0	0	0	0	0	0	1	0	1
hsa-miR-124-5p	MIMAT0004591	ALOXE3	59344	NM_021628	0	0	0	0	0	0	0	0	0	0	1	0	1
hsa-miR-124-5p	MIMAT0004591	ALOXE3	59344	XM_005256745	0	0	0	0	0	0	0	0	0	0	1	0	1
hsa-miR-124-5p	MIMAT0004591	ALPI	248	NM_001631	0	0	0	0	0	1	0	0	0	0	1	1	3
hsa-miR-124-5p	MIMAT0004591	ALPK1	80216	NM_025144	0	1	0	0	0	1	0	0	0	1	1	0	4
hsa-miR-124-5p	MIMAT0004591	ALPK1	80216	XM_005263248	0	0	0	0	0	1	0	0	0	0	1	0	2
hsa-miR-124-5p	MIMAT0004591	ALPK1	80216	XM_005263247	0	0	0	0	0	1	0	0	0	0	1	0	2
hsa-miR-124-5p	MIMAT0004591	ALPK1	80216	XM_005263246	0	0	0	0	0	1	0	0	0	0	1	0	2
hsa-miR-124-5p	MIMAT0004591	ALPK1	80216	XM_005263245	0	0	0	0	0	1	0	0	0	0	1	0	2
hsa-miR-124-5p	MIMAT0004591	ALPK1	80216	NM_001253884	0	0	0	0	0	1	0	0	0	0	1	0	2
hsa-miR-124-5p	MIMAT0004591	ALPK1	80216	NM_001102406	0	0	0	0	0	1	0	0	0	0	1	0	2
hsa-miR-124-5p	MIMAT0004591	ALPK2	115701	NM_052947	0	0	0	0	0	0	0	0	0	0	1	0	1
hsa-miR-124-5p	MIMAT0004591	ALPK2	115701	XM_005266646	0	0	0	0	0	0	0	0	0	0	1	0	1
hsa-miR-124-5p	MIMAT0004591	ALPK3	57538	NM_020778	0	1	0	0	0	1	0	0	0	1	1	1	5
hsa-miR-124-5p	MIMAT0004591	ALPL	249	NM_000478	0	1	1	0	0	1	0	1	0	0	1	1	6
hsa-miR-124-5p	MIMAT0004591	ALPL	249	NM_001177520	0	0	1	0	0	1	0	1	0	0	1	1	5
hsa-miR-124-5p	MIMAT0004591	ALPL	249	NM_001127501	0	0	1	0	0	1	0	1	0	0	1	1	5
hsa-miR-124-5p	MIMAT0004591	ALPL	249	XM_005245819	0	0	1	0	0	1	0	0	0	0	1	1	4
hsa-miR-124-5p	MIMAT0004591	ALPL	249	XM_005245818	0	0	1	0	0	1	0	0	0	0	1	1	4
hsa-miR-124-5p	MIMAT0004591	ALPL	249	XM_005245820	0	0	0	0	0	1	0	0	0	0	0	0	1
hsa-miR-124-5p	MIMAT0004591	ALPP	250	NM_001632	0	0	0	0	0	0	0	0	0	0	1	0	1
hsa-miR-124-5p	MIMAT0004591	ALPPL2	251	NM_031313	0	0	0	0	0	0	0	0	0	1	1	0	2
hsa-miR-124-5p	MIMAT0004591	ALS2	57679	NM_001135745	1	0	0	0	0	1	0	0	0	0	1	0	3
hsa-miR-124-5p	MIMAT0004591	ALS2	57679	NM_020919	0	0	0	0	0	1	0	0	0	0	1	0	2
hsa-miR-124-5p	MIMAT0004591	ALS2	57679	XM_005246710	0	0	0	0	0	1	0	0	0	0	1	0	2
hsa-miR-124-5p	MIMAT0004591	ALS2	57679	XM_005246709	0	0	0	0	0	1	0	0	0	0	1	0	2
hsa-miR-124-5p	MIMAT0004591	ALS2CL	259173	NM_001190707	0	1	0	0	0	0	0	0	0	1	1	0	3
hsa-miR-124-5p	MIMAT0004591	ALS2CL	259173	NM_182775	0	0	0	0	0	0	0	0	0	0	1	0	1
hsa-miR-124-5p	MIMAT0004591	ALS2CL	259173	XM_005265025	0	0	0	0	0	0	0	0	0	0	1	0	1
hsa-miR-124-5p	MIMAT0004591	ALS2CL	259173	NM_147129	0	0	0	0	0	0	0	0	0	0	1	0	1
hsa-miR-124-5p	MIMAT0004591	ALS2CR11	151254	NM_001168221	0	0	0	0	0	0	0	0	0	0	1	0	1
hsa-miR-124-5p	MIMAT0004591	ALS2CR11	151254	XM_005246349	0	0	0	0	0	0	0	0	0	0	1	0	1
hsa-miR-124-5p	MIMAT0004591	ALS2CR11	151254	NM_001168216	0	0	0	0	0	0	0	0	0	0	1	0	1
hsa-miR-124-5p	MIMAT0004591	ALS2CR11	151254	NM_152525	0	0	0	0	0	0	0	0	0	0	1	0	1
hsa-miR-124-5p	MIMAT0004591	ALS2CR11	151254	NM_001168217	0	0	0	0	0	0	0	0	0	0	1	0	1
hsa-miR-124-5p	MIMAT0004591	ALS2CR12	130540	NM_139163	0	0	0	0	0	0	0	0	0	0	1	0	1
hsa-miR-124-5p	MIMAT0004591	ALS2CR12	130540	NM_001127391	0	0	0	0	0	0	0	0	0	0	1	0	1
hsa-miR-124-5p	MIMAT0004591	ALX1	8092	XM_005269165	0	0	0	0	0	0	0	0	0	0	1	0	1
hsa-miR-124-5p	MIMAT0004591	ALX1	8092	NM_006982	0	0	0	0	0	0	0	0	0	0	1	0	1
hsa-miR-124-5p	MIMAT0004591	ALX3	257	NM_006492	1	0	0	0	0	0	0	0	0	0	1	0	2
hsa-miR-124-5p	MIMAT0004591	ALX4	60529	NM_021926	1	1	0	0	0	1	0	0	0	1	1	1	6
hsa-miR-124-5p	MIMAT0004591	ALYREF	10189	XM_005256333	0	0	0	0	0	0	0	0	0	0	1	0	1
hsa-miR-124-5p	MIMAT0004591	AMACR	23600	NM_014324	0	0	0	0	0	1	0	0	0	1	1	0	3
hsa-miR-124-5p	MIMAT0004591	AMACR	23600	NM_203382	0	0	0	0	0	1	0	0	0	0	1	1	3
hsa-miR-124-5p	MIMAT0004591	AMACR	23600	NM_001167595	0	0	0	0	0	1	0	0	0	0	1	0	2
hsa-miR-124-5p	MIMAT0004591	AMBN	258	NM_016519	0	0	0	0	0	0	0	0	0	0	1	0	1
hsa-miR-124-5p	MIMAT0004591	AMBRA1	55626	XM_005253010	0	0	0	0	0	0	0	0	0	0	1	0	1
hsa-miR-124-5p	MIMAT0004591	AMBRA1	55626	NM_001267783	0	0	0	0	0	0	0	0	0	0	1	0	1
hsa-miR-124-5p	MIMAT0004591	AMBRA1	55626	XM_005253014	0	0	0	0	0	0	0	0	0	0	1	0	1
hsa-miR-124-5p	MIMAT0004591	AMBRA1	55626	XM_005253013	0	0	0	0	0	0	0	0	0	0	1	0	1
hsa-miR-124-5p	MIMAT0004591	AMBRA1	55626	NM_017749	0	0	0	0	0	0	0	0	0	0	1	0	1
hsa-miR-124-5p	MIMAT0004591	AMBRA1	55626	XM_005253012	0	0	0	0	0	0	0	0	0	0	1	0	1
hsa-miR-124-5p	MIMAT0004591	AMBRA1	55626	XM_005253011	0	0	0	0	0	0	0	0	0	0	1	0	1
hsa-miR-124-5p	MIMAT0004591	AMBRA1	55626	XM_005253009	0	0	0	0	0	0	0	0	0	0	1	0	1
hsa-miR-124-5p	MIMAT0004591	AMBRA1	55626	NM_001267782	0	0	0	0	0	0	0	0	0	0	1	0	1
hsa-miR-124-5p	MIMAT0004591	AMD1	262	NM_001634	0	1	0	0	0	1	0	0	0	0	1	1	4
hsa-miR-124-5p	MIMAT0004591	AMD1	262	XM_005266926	0	0	0	0	0	1	0	0	0	0	1	1	3
hsa-miR-124-5p	MIMAT0004591	AMD1	262	NM_001033059	0	0	0	0	0	1	0	0	0	0	1	1	3
hsa-miR-124-5p	MIMAT0004591	AMD1	262	XM_005266925	0	0	0	0	0	1	0	0	0	0	1	1	3
hsa-miR-124-5p	MIMAT0004591	AMD1	262	XM_005266924	0	0	0	0	0	1	0	0	0	0	1	1	3
hsa-miR-124-5p	MIMAT0004591	AMDHD1	144193	NM_152435	0	0	0	0	0	0	0	0	0	0	1	0	1
hsa-miR-124-5p	MIMAT0004591	AMDHD2	51005	NM_001145815	0	0	0	0	0	0	0	0	0	0	1	0	1
hsa-miR-124-5p	MIMAT0004591	AMDHD2	51005	NM_015944	0	0	0	0	0	0	0	0	0	0	1	0	1
hsa-miR-124-5p	MIMAT0004591	AMELX	265	NM_182680	0	1	0	0	0	1	0	0	0	0	1	1	4
hsa-miR-124-5p	MIMAT0004591	AMELX	265	NM_182681	0	0	0	0	0	1	0	0	0	0	1	1	3
hsa-miR-124-5p	MIMAT0004591	AMELX	265	NM_001142	0	0	0	0	0	1	0	0	0	0	1	1	3
hsa-miR-124-5p	MIMAT0004591	AMELY	266	NM_001143	0	0	0	0	0	0	0	0	0	0	1	0	1
hsa-miR-124-5p	MIMAT0004591	AMER1	139285	NM_152424	1	0	0	0	0	1	0	0	0	1	1	0	4
hsa-miR-124-5p	MIMAT0004591	AMER1	139285	XM_005262241	0	0	0	0	0	1	0	0	0	0	1	0	2
hsa-miR-124-5p	MIMAT0004591	AMER1	139285	XM_005262242	0	0	0	0	0	1	0	0	0	0	1	0	2
hsa-miR-124-5p	MIMAT0004591	AMER2	219287	XM_005266279	1	1	1	0	0	1	0	0	0	1	1	1	7
hsa-miR-124-5p	MIMAT0004591	AMER2	219287	XM_005266281	1	0	1	0	0	1	0	0	0	0	1	1	5
hsa-miR-124-5p	MIMAT0004591	AMER2	219287	XM_005266280	1	0	1	0	0	1	0	0	0	0	1	1	5
hsa-miR-124-5p	MIMAT0004591	AMER2	219287	NM_199138	0	0	1	0	0	1	0	0	0	0	1	1	4
hsa-miR-124-5p	MIMAT0004591	AMER2	219287	NM_152704	0	0	1	0	0	1	0	0	0	0	1	1	4
hsa-miR-124-5p	MIMAT0004591	AMER3	205147	NM_152698	0	0	0	0	0	1	0	0	0	1	1	1	4
hsa-miR-124-5p	MIMAT0004591	AMER3	205147	NM_001105195	0	0	0	0	0	1	0	0	0	0	1	1	3
hsa-miR-124-5p	MIMAT0004591	AMER3	205147	NM_001105194	0	0	0	0	0	1	0	0	0	0	1	1	3
hsa-miR-124-5p	MIMAT0004591	AMER3	205147	NM_001105193	0	0	0	0	0	1	0	0	0	0	1	1	3
hsa-miR-124-5p	MIMAT0004591	AMFR	267	XM_005255890	1	0	0	0	0	0	0	0	0	1	1	0	3
hsa-miR-124-5p	MIMAT0004591	AMFR	267	XM_005255889	1	0	0	0	0	0	0	0	0	0	1	0	2
hsa-miR-124-5p	MIMAT0004591	AMFR	267	NM_001144	1	0	0	0	0	0	0	0	0	0	1	0	2
hsa-miR-124-5p	MIMAT0004591	AMH	268	NM_000479	0	0	0	0	0	0	0	0	0	0	1	0	1
hsa-miR-124-5p	MIMAT0004591	AMH	268	XM_005259537	0	0	0	0	0	0	0	0	0	0	1	0	1
hsa-miR-124-5p	MIMAT0004591	AMHR2	269	NM_020547	0	0	0	0	0	0	0	0	0	1	0	0	1
hsa-miR-124-5p	MIMAT0004591	AMHR2	269	XM_005268795	0	0	0	0	0	0	0	0	0	0	1	0	1
hsa-miR-124-5p	MIMAT0004591	AMHR2	269	XM_005268792	0	0	0	0	0	0	0	0	0	0	1	0	1
hsa-miR-124-5p	MIMAT0004591	AMHR2	269	XM_005268790	0	0	0	0	0	0	0	0	0	0	1	0	1
hsa-miR-124-5p	MIMAT0004591	AMHR2	269	NM_001164690	0	0	0	0	0	0	0	0	0	0	1	0	1
hsa-miR-124-5p	MIMAT0004591	AMICA1	120425	NM_153206	0	0	0	0	0	0	0	0	0	0	1	0	1
hsa-miR-124-5p	MIMAT0004591	AMICA1	120425	XM_005271406	0	0	0	0	0	0	0	0	0	0	1	0	1
hsa-miR-124-5p	MIMAT0004591	AMICA1	120425	XM_005271408	0	0	0	0	0	0	0	0	0	0	1	0	1
hsa-miR-124-5p	MIMAT0004591	AMICA1	120425	XM_005271407	0	0	0	0	0	0	0	0	0	0	1	0	1
hsa-miR-124-5p	MIMAT0004591	AMICA1	120425	XM_005271409	0	0	0	0	0	0	0	0	0	0	1	0	1
hsa-miR-124-5p	MIMAT0004591	AMICA1	120425	NM_001098526	0	0	0	0	0	0	0	0	0	0	1	0	1
hsa-miR-124-5p	MIMAT0004591	AMIGO1	57463	NM_020703	0	0	0	0	0	0	0	0	0	1	1	0	2
hsa-miR-124-5p	MIMAT0004591	AMIGO2	347902	NM_181847	1	0	0	0	0	0	0	0	0	1	1	0	3
hsa-miR-124-5p	MIMAT0004591	AMIGO2	347902	XM_005268837	1	0	0	0	0	0	0	0	0	0	1	0	2
hsa-miR-124-5p	MIMAT0004591	AMIGO2	347902	NM_001143668	1	0	0	0	0	0	0	0	0	0	1	0	2
hsa-miR-124-5p	MIMAT0004591	AMIGO3	386724	NM_198722	0	0	0	0	0	0	0	0	0	0	1	0	1
hsa-miR-124-5p	MIMAT0004591	AMMECR1	9949	NM_001171689	0	0	0	0	0	0	0	0	0	1	1	0	2
hsa-miR-124-5p	MIMAT0004591	AMMECR1	9949	NM_001025580	0	0	0	0	0	0	0	0	0	0	1	0	1
hsa-miR-124-5p	MIMAT0004591	AMMECR1	9949	NM_015365	0	0	0	0	0	0	0	0	0	0	1	0	1
hsa-miR-124-5p	MIMAT0004591	AMMECR1L	83607	XM_005263808	0	0	1	0	0	1	0	0	0	1	1	1	5
hsa-miR-124-5p	MIMAT0004591	AMMECR1L	83607	NM_031445	0	0	1	0	1	1	0	0	0	0	1	1	5
hsa-miR-124-5p	MIMAT0004591	AMMECR1L	83607	NM_001199140	0	0	1	0	1	1	0	0	0	0	1	1	5
hsa-miR-124-5p	MIMAT0004591	AMMECR1L	83607	XM_005263807	0	0	1	0	0	1	0	0	0	0	1	1	4
hsa-miR-124-5p	MIMAT0004591	AMMECR1L	83607	XM_005263805	0	0	1	0	0	1	0	0	0	0	1	1	4
hsa-miR-124-5p	MIMAT0004591	AMMECR1L	83607	XM_005263806	0	0	1	0	0	1	0	0	0	0	1	1	4
hsa-miR-124-5p	MIMAT0004591	AMMECR1L	83607	XM_005263804	0	0	1	0	0	1	0	0	0	0	1	1	4
hsa-miR-124-5p	MIMAT0004591	AMN1	196394	NM_001278412	0	0	0	0	0	0	0	0	0	0	1	0	1
hsa-miR-124-5p	MIMAT0004591	AMN1	196394	NM_001278411	0	0	0	0	0	0	0	0	0	0	1	0	1
hsa-miR-124-5p	MIMAT0004591	AMN1	196394	NM_001113402	0	0	0	0	0	0	0	0	0	0	1	0	1
hsa-miR-124-5p	MIMAT0004591	AMOT	154796	XM_005262087	1	1	1	0	0	1	0	0	0	1	1	1	7
hsa-miR-124-5p	MIMAT0004591	AMOT	154796	XM_005262090	1	0	1	0	0	1	0	0	0	0	1	1	5
hsa-miR-124-5p	MIMAT0004591	AMOT	154796	NM_133265	1	0	1	0	0	1	0	0	0	0	1	1	5
hsa-miR-124-5p	MIMAT0004591	AMOT	154796	NM_001113490	1	0	1	0	0	1	0	0	0	0	1	1	5
hsa-miR-124-5p	MIMAT0004591	AMOT	154796	XM_005262088	1	0	1	0	0	1	0	0	0	0	1	1	5
hsa-miR-124-5p	MIMAT0004591	AMOT	154796	XM_005262089	1	0	1	0	0	1	0	0	0	0	1	1	5
hsa-miR-124-5p	MIMAT0004591	AMOTL1	154810	XM_005273798	1	1	0	0	0	1	0	0	0	1	1	1	6
hsa-miR-124-5p	MIMAT0004591	AMOTL1	154810	XM_005273801	1	0	0	0	0	1	0	0	0	0	1	1	4
hsa-miR-124-5p	MIMAT0004591	AMOTL1	154810	XM_005273800	1	0	0	0	0	1	0	0	0	0	1	1	4
hsa-miR-124-5p	MIMAT0004591	AMOTL1	154810	XM_005273799	1	0	0	0	0	1	0	0	0	0	1	1	4
hsa-miR-124-5p	MIMAT0004591	AMOTL1	154810	NM_130847	1	0	0	0	0	1	0	0	0	0	1	1	4
hsa-miR-124-5p	MIMAT0004591	AMOTL2	51421	NM_016201	1	0	0	0	0	0	0	0	0	1	1	0	3
hsa-miR-124-5p	MIMAT0004591	AMOTL2	51421	XM_005247522	1	0	0	0	0	0	0	0	0	0	1	0	2
hsa-miR-124-5p	MIMAT0004591	AMOTL2	51421	XM_005247521	1	0	0	0	0	0	0	0	0	0	1	0	2
hsa-miR-124-5p	MIMAT0004591	AMOTL2	51421	XM_005247520	1	0	0	0	0	0	0	0	0	0	1	0	2
hsa-miR-124-5p	MIMAT0004591	AMOTL2	51421	XM_005247519	1	0	0	0	0	0	0	0	0	0	1	0	2
hsa-miR-124-5p	MIMAT0004591	AMOTL2	51421	NM_001278683	1	0	0	0	0	0	0	0	0	0	1	0	2
hsa-miR-124-5p	MIMAT0004591	AMOTL2	51421	NM_001278685	1	0	0	0	0	0	0	0	0	0	1	0	2
hsa-miR-124-5p	MIMAT0004591	AMPD2	271	NM_001257360	1	0	0	0	0	0	0	0	0	0	1	0	2
hsa-miR-124-5p	MIMAT0004591	AMPD2	271	NM_001257361	1	0	0	0	0	0	0	0	0	0	1	0	2
hsa-miR-124-5p	MIMAT0004591	AMPD2	271	NM_203404	1	0	0	0	0	0	0	0	0	0	1	0	2
hsa-miR-124-5p	MIMAT0004591	AMPD2	271	XM_005270752	1	0	0	0	0	0	0	0	0	0	1	0	2
hsa-miR-124-5p	MIMAT0004591	AMPD2	271	NM_139156	1	0	0	0	0	0	0	0	0	0	1	0	2
hsa-miR-124-5p	MIMAT0004591	AMPD2	271	NM_004037	1	0	0	0	0	0	0	0	0	0	1	0	2
hsa-miR-124-5p	MIMAT0004591	AMPD3	272	NM_001025390	1	0	0	0	0	0	0	0	0	1	1	0	3
hsa-miR-124-5p	MIMAT0004591	AMPD3	272	NM_001172431	1	0	0	0	0	0	0	0	0	0	1	0	2
hsa-miR-124-5p	MIMAT0004591	AMPD3	272	XM_005252868	1	0	0	0	0	0	0	0	0	0	1	0	2
hsa-miR-124-5p	MIMAT0004591	AMPD3	272	XM_005252867	1	0	0	0	0	0	0	0	0	0	1	0	2
hsa-miR-124-5p	MIMAT0004591	AMPD3	272	NM_001172430	1	0	0	0	0	0	0	0	0	0	1	0	2
hsa-miR-124-5p	MIMAT0004591	AMPD3	272	NM_001025389	1	0	0	0	0	0	0	0	0	0	1	0	2
hsa-miR-124-5p	MIMAT0004591	AMPD3	272	NM_000480	1	0	0	0	0	0	0	0	0	0	1	0	2
hsa-miR-124-5p	MIMAT0004591	AMPH	273	XM_005249702	0	1	0	0	0	1	0	0	0	0	1	0	3
hsa-miR-124-5p	MIMAT0004591	AMPH	273	NM_139316	0	0	0	0	0	1	0	0	0	0	1	0	2
hsa-miR-124-5p	MIMAT0004591	AMPH	273	NM_001635	0	0	0	0	0	1	0	0	0	0	1	0	2
hsa-miR-124-5p	MIMAT0004591	AMT	275	NM_000481	0	1	0	0	0	0	0	0	0	0	1	0	2
hsa-miR-124-5p	MIMAT0004591	AMT	275	NM_001164712	0	0	0	0	0	0	0	0	0	0	1	0	1
hsa-miR-124-5p	MIMAT0004591	AMT	275	NM_001164711	0	0	0	0	0	0	0	0	0	0	1	0	1
hsa-miR-124-5p	MIMAT0004591	AMT	275	NM_001164710	0	0	0	0	0	0	0	0	0	0	1	0	1
hsa-miR-124-5p	MIMAT0004591	AMZ1	155185	NM_133463	0	0	0	0	0	0	0	0	0	1	1	0	2
hsa-miR-124-5p	MIMAT0004591	AMZ2	51321	NM_016627	0	1	0	0	0	1	0	0	0	0	1	0	3
hsa-miR-124-5p	MIMAT0004591	AMZ2	51321	XM_005257438	0	0	0	0	0	1	0	0	0	0	1	1	3
hsa-miR-124-5p	MIMAT0004591	AMZ2	51321	XM_005277783	0	0	0	0	0	1	0	0	0	0	1	1	3
hsa-miR-124-5p	MIMAT0004591	AMZ2	51321	XM_005257437	0	0	0	0	0	1	0	0	0	0	1	0	2
hsa-miR-124-5p	MIMAT0004591	AMZ2	51321	XM_005277782	0	0	0	0	0	1	0	0	0	0	1	0	2
hsa-miR-124-5p	MIMAT0004591	AMZ2	51321	XM_005257435	0	0	0	0	0	1	0	0	0	0	1	0	2
hsa-miR-124-5p	MIMAT0004591	AMZ2	51321	XM_005277780	0	0	0	0	0	1	0	0	0	0	1	0	2
hsa-miR-124-5p	MIMAT0004591	AMZ2	51321	NM_001033572	0	0	0	0	0	1	0	0	0	0	1	0	2
hsa-miR-124-5p	MIMAT0004591	AMZ2	51321	NM_001033571	0	0	0	0	0	1	0	0	0	0	1	0	2
hsa-miR-124-5p	MIMAT0004591	AMZ2	51321	XM_005257434	0	0	0	0	0	1	0	0	0	0	1	0	2
hsa-miR-124-5p	MIMAT0004591	AMZ2	51321	XM_005277779	0	0	0	0	0	1	0	0	0	0	1	0	2
hsa-miR-124-5p	MIMAT0004591	AMZ2	51321	XM_005257433	0	0	0	0	0	1	0	0	0	0	1	0	2
hsa-miR-124-5p	MIMAT0004591	AMZ2	51321	XM_005277778	0	0	0	0	0	1	0	0	0	0	1	0	2
hsa-miR-124-5p	MIMAT0004591	AMZ2	51321	NM_001033570	0	0	0	0	0	1	0	0	0	0	1	0	2
hsa-miR-124-5p	MIMAT0004591	AMZ2	51321	NM_001033569	0	0	0	0	0	1	0	0	0	0	1	0	2
hsa-miR-124-5p	MIMAT0004591	AMZ2	51321	XM_005257432	0	0	0	0	0	1	0	0	0	0	1	0	2
hsa-miR-124-5p	MIMAT0004591	AMZ2	51321	XM_005277777	0	0	0	0	0	1	0	0	0	0	1	0	2
hsa-miR-124-5p	MIMAT0004591	AMZ2	51321	XM_005257436	0	0	0	0	0	1	0	0	0	0	1	0	2
hsa-miR-124-5p	MIMAT0004591	AMZ2	51321	XM_005277781	0	0	0	0	0	1	0	0	0	0	1	0	2
hsa-miR-124-5p	MIMAT0004591	AMZ2	51321	NM_001033574	0	0	0	0	0	1	0	0	0	0	1	0	2
hsa-miR-124-5p	MIMAT0004591	ANAPC1	64682	NM_022662	0	0	0	0	0	0	0	0	0	0	1	0	1
hsa-miR-124-5p	MIMAT0004591	ANAPC1	64682	XM_005263733	0	0	0	0	0	0	0	0	0	0	1	0	1
hsa-miR-124-5p	MIMAT0004591	ANAPC1	64682	XM_005263732	0	0	0	0	0	0	0	0	0	0	1	0	1
hsa-miR-124-5p	MIMAT0004591	ANAPC1	64682	XM_005263731	0	0	0	0	0	0	0	0	0	0	1	0	1
hsa-miR-124-5p	MIMAT0004591	ANAPC10	10393	NM_001256708	0	0	0	0	0	0	0	0	0	0	1	0	1
hsa-miR-124-5p	MIMAT0004591	ANAPC10	10393	NM_001256712	0	0	0	0	0	0	0	0	0	0	1	0	1
hsa-miR-124-5p	MIMAT0004591	ANAPC10	10393	NM_014885	0	0	0	0	0	0	0	0	0	0	1	0	1
hsa-miR-124-5p	MIMAT0004591	ANAPC10	10393	NM_001256706	0	0	0	0	0	0	0	0	0	0	1	0	1
hsa-miR-124-5p	MIMAT0004591	ANAPC10	10393	NM_001256710	0	0	0	0	0	0	0	0	0	0	1	0	1
hsa-miR-124-5p	MIMAT0004591	ANAPC10	10393	NM_001256707	0	0	0	0	0	0	0	0	0	0	1	0	1
hsa-miR-124-5p	MIMAT0004591	ANAPC10	10393	NM_001256711	0	0	0	0	0	0	0	0	0	0	1	0	1
hsa-miR-124-5p	MIMAT0004591	ANAPC10	10393	NM_001256709	0	0	0	0	0	0	0	0	0	0	1	0	1
hsa-miR-124-5p	MIMAT0004591	ANAPC11	51529	NM_001002244	0	0	0	0	0	0	0	0	0	1	1	0	2
hsa-miR-124-5p	MIMAT0004591	ANAPC11	51529	NM_001002245	0	0	0	0	0	0	0	0	0	0	1	0	1
hsa-miR-124-5p	MIMAT0004591	ANAPC11	51529	NM_001002247	0	0	0	0	0	0	0	0	0	0	1	0	1
hsa-miR-124-5p	MIMAT0004591	ANAPC11	51529	NM_001002246	0	0	0	0	0	0	0	0	0	0	1	0	1
hsa-miR-124-5p	MIMAT0004591	ANAPC11	51529	NM_001002248	0	0	0	0	0	0	0	0	0	0	1	0	1
hsa-miR-124-5p	MIMAT0004591	ANAPC11	51529	NM_016476	0	0	0	0	0	0	0	0	0	0	1	0	1
hsa-miR-124-5p	MIMAT0004591	ANAPC11	51529	NM_001002249	0	0	0	0	0	0	0	0	0	0	1	0	1
hsa-miR-124-5p	MIMAT0004591	ANAPC13	25847	NM_001242374	0	0	0	0	0	0	0	0	0	1	1	0	2
hsa-miR-124-5p	MIMAT0004591	ANAPC13	25847	NM_015391	0	0	0	0	0	0	0	0	0	0	1	0	1
hsa-miR-124-5p	MIMAT0004591	ANAPC13	25847	NM_001242375	0	0	0	0	0	0	0	0	0	0	1	0	1
hsa-miR-124-5p	MIMAT0004591	ANAPC15	25906	NM_001278494	0	0	0	0	0	0	0	0	0	0	1	0	1
hsa-miR-124-5p	MIMAT0004591	ANAPC15	25906	XM_005273887	0	0	0	0	0	0	0	0	0	0	1	0	1
hsa-miR-124-5p	MIMAT0004591	ANAPC15	25906	NM_001278491	0	0	0	0	0	0	0	0	0	0	1	0	1
hsa-miR-124-5p	MIMAT0004591	ANAPC15	25906	NM_001278493	0	0	0	0	0	0	0	0	0	0	1	0	1
hsa-miR-124-5p	MIMAT0004591	ANAPC15	25906	NM_001278488	0	0	0	0	0	0	0	0	0	0	1	0	1
hsa-miR-124-5p	MIMAT0004591	ANAPC15	25906	NM_001278490	0	0	0	0	0	0	0	0	0	0	1	0	1
hsa-miR-124-5p	MIMAT0004591	ANAPC15	25906	XM_005273888	0	0	0	0	0	0	0	0	0	0	1	0	1
hsa-miR-124-5p	MIMAT0004591	ANAPC15	25906	NM_001278492	0	0	0	0	0	0	0	0	0	0	1	0	1
hsa-miR-124-5p	MIMAT0004591	ANAPC15	25906	NM_001278489	0	0	0	0	0	0	0	0	0	0	1	0	1
hsa-miR-124-5p	MIMAT0004591	ANAPC15	25906	NM_001278487	0	0	0	0	0	0	0	0	0	0	1	0	1
hsa-miR-124-5p	MIMAT0004591	ANAPC15	25906	NM_014042	0	0	0	0	0	0	0	0	0	0	1	0	1
hsa-miR-124-5p	MIMAT0004591	ANAPC15	25906	NM_001278486	0	0	0	0	0	0	0	0	0	0	1	0	1
hsa-miR-124-5p	MIMAT0004591	ANAPC15	25906	NM_001278485	0	0	0	0	0	0	0	0	0	0	1	0	1
hsa-miR-124-5p	MIMAT0004591	ANAPC15	25906	XM_005273885	0	0	0	0	0	0	0	0	0	0	1	0	1
hsa-miR-124-5p	MIMAT0004591	ANAPC15	25906	XM_005273886	0	0	0	0	0	0	0	0	0	0	1	0	1
[truncated: 55,205 more rows]

## Sheet: consolidated target genes
Gene
A1BG
A1CF
A2M
A2ML1
A4GALT
A4GNT
AACS
AADACL3
AADACL4
AADAT
AAED1
AAGAB
AAK1
AAMP
AANAT
AAR2
AARD
AARS
AARS2
AARSD1
AASDH
AASDHPPT
AASS
AATF
AATK
ABAT
ABCA1
ABCA10
ABCA12
ABCA13
ABCA2
ABCA3
ABCA4
ABCA5
ABCA6
ABCA7
ABCA8
ABCA9
ABCB1
ABCB10
ABCB11
ABCB5
ABCB6
ABCB8
ABCB9
ABCC1
ABCC10
ABCC12
ABCC2
ABCC3
ABCC4
ABCC5
ABCC6
ABCC8
ABCC9
ABCD1
ABCD2
ABCD3
ABCD4
ABCE1
ABCF1
ABCF2
ABCF3
ABCG1
ABCG2
ABCG4
ABCG5
ABCG8
ABHD1
ABHD10
ABHD11
ABHD12
ABHD12B
ABHD13
ABHD14B
ABHD15
ABHD16A
ABHD17B
ABHD17C
ABHD2
ABHD3
ABHD4
ABHD5
ABHD6
ABHD8
ABI1
ABI2
ABI3BP
ABL1
ABL2
ABLIM1
ABLIM2
ABLIM3
ABR
ABRA
ABRACL
ABT1
ABTB1
ABTB2
ACAA1
ACACA
ACACB
ACAD10
ACAD11
ACAD8
ACAD9
ACADL
ACADM
ACADS
ACADSB
ACADVL
ACAN
ACAP2
ACAP3
ACAT1
ACAT2
ACBD3
ACBD4
ACBD5
ACBD7
ACCS
ACE
ACE2
ACER1
ACER2
ACER3
ACHE
ACIN1
ACKR2
ACKR3
ACKR4
ACLY
ACMSD
ACN9
ACO1
ACO2
ACOT11
ACOT12
ACOT13
ACOT7
ACOT8
ACOT9
ACOX1
ACOX2
ACOX3
ACOXL
ACP1
ACP2
ACP5
ACP6
ACPL2
ACPP
ACRBP
ACRC
ACRV1
ACSBG1
ACSBG2
ACSF2
ACSF3
ACSL1
ACSL3
ACSL4
ACSL5
ACSL6
ACSM1
ACSM2A
ACSM2B
ACSM5
ACSS1
ACSS2
ACSS3
ACTA2
ACTB
ACTBL2
ACTC1
ACTG1
ACTL10
ACTL6A
ACTL7A
ACTL8
ACTL9
ACTN1
ACTN2
ACTN3
ACTN4
ACTR10
ACTR1A
ACTR1B
ACTR2
ACTR3
ACTR3B
ACTR3C
ACTR5
ACTR6
ACTR8
ACTRT1
ACTRT2
ACTRT3
ACVR1
ACVR1B
ACVR1C
ACVR2A
ACVR2B
ACVRL1
ACY3
ACYP1
ACYP2
ADA
ADAD2
ADAL
ADAM10
ADAM11
ADAM12
ADAM15
ADAM17
ADAM18
ADAM19
ADAM2
ADAM20
ADAM21
ADAM22
ADAM23
ADAM28
ADAM30
ADAM32
ADAM33
ADAM7
ADAM8
ADAM9
ADAMDEC1
ADAMTS1
ADAMTS10
ADAMTS12
ADAMTS13
ADAMTS14
ADAMTS15
ADAMTS16
ADAMTS17
ADAMTS18
ADAMTS19
ADAMTS2
ADAMTS20
ADAMTS3
ADAMTS4
ADAMTS5
ADAMTS6
ADAMTS7
ADAMTS8
ADAMTS9
ADAMTSL1
ADAMTSL2
ADAMTSL3
ADAMTSL4
ADAMTSL5
ADAP1
ADAP2
ADAR
ADARB1
ADARB2
ADAT1
ADAT2
ADAT3
ADC
ADCK1
ADCK2
ADCK3
ADCK4
ADCK5
ADCY1
ADCY10
ADCY2
ADCY3
ADCY4
ADCY5
ADCY6
ADCY7
ADCY9
ADCYAP1
ADCYAP1R1
ADD1
ADD2
ADD3
ADGB
ADH1A
ADH1B
ADH1C
ADH4
ADH5
ADH6
ADH7
ADHFE1
ADI1
ADIG
ADIPOQ
ADIPOR1
ADIPOR2
ADIRF
ADK
ADM
ADM2
ADM5
ADNP
ADNP2
ADO
ADORA1
ADORA2A
ADORA2B
ADORA3
ADPGK
ADPRH
ADPRHL1
ADPRHL2
ADPRM
ADRA1A
ADRA1B
ADRA1D
ADRA2A
ADRA2B
ADRA2C
ADRB1
ADRB2
ADRB3
ADRBK1
ADRBK2
ADRM1
ADSL
ADSS
ADTRP
AEBP1
AEBP2
AEN
AES
AFAP1
AFAP1L1
AFAP1L2
AFF1
AFF2
AFF3
AFF4
AFG3L2
AFM
AFMID
AFP
AFTPH
AGA
AGAP1
AGAP10
AGAP11
AGAP2
AGAP3
AGAP5
AGAP9
AGBL2
AGBL3
AGBL4
AGBL5
AGER
AGFG1
AGFG2
AGGF1
AGK
AGL
AGMAT
AGMO
AGO1
AGO2
AGO3
AGO4
AGPAT1
AGPAT2
AGPAT3
AGPAT4
AGPAT5
AGPAT6
AGPAT9
AGPS
AGR2
AGRN
AGT
AGTPBP1
AGTR1
AGTR2
AGTRAP
AGXT
AGXT2
AHCTF1
AHCY
AHCYL1
AHCYL2
AHDC1
AHI1
AHNAK
AHNAK2
AHR
AHRR
AHSA1
AHSA2
AHSG
AICDA
AIDA
AIF1
AIF1L
AIFM1
AIFM2
AIFM3
AIG1
AIM1
AIM1L
AIM2
AIMP1
AIP
AIPL1
AIRE
AJAP1
AJUBA
AK1
AK2
AK3
AK4
AK5
AK8
AK9
AKAP1
AKAP10
AKAP11
AKAP12
AKAP13
AKAP14
AKAP17A
AKAP2
AKAP3
AKAP4
AKAP5
AKAP6
AKAP7
AKAP8
AKAP9
AKIP1
AKIRIN1
AKIRIN2
AKNA
AKR1A1
AKR1B1
AKR1B10
AKR1B15
AKR1C1
AKR1C2
AKR1C3
AKR1C4
AKR1D1
AKR1E2
AKR7A2
AKR7A3
AKT1
AKT1S1
AKT2
AKT3
AKTIP
ALAD
ALAS1
ALCAM
ALDH16A1
ALDH18A1
ALDH1A1
ALDH1A2
ALDH1A3
ALDH1B1
ALDH1L1
ALDH1L2
ALDH2
ALDH3A1
ALDH3A2
ALDH3B1
ALDH3B2
ALDH4A1
ALDH5A1
ALDH6A1
ALDH7A1
ALDH8A1
ALDH9A1
ALDOA
ALDOB
ALDOC
ALG1
ALG10
ALG10B
ALG11
ALG12
ALG13
ALG1L
ALG1L2
ALG2
ALG3
ALG5
ALG6
ALG9
ALK
ALKBH1
ALKBH4
ALKBH5
ALKBH6
ALKBH7
ALKBH8
ALLC
ALMS1
ALOX12
ALOX12B
ALOX15
ALOX15B
ALOX5
ALOX5AP
ALOXE3
ALPI
ALPK1
ALPK2
ALPK3
ALPL
ALPP
ALPPL2
ALS2
ALS2CL
ALS2CR11
ALS2CR12
ALX1
ALX3
ALX4
ALYREF
AMACR
AMBN
AMBRA1
AMD1
AMDHD1
AMDHD2
AMELX
AMELY
AMER1
AMER2
AMER3
AMFR
AMH
AMHR2
AMICA1
AMIGO1
AMIGO2
AMIGO3
AMMECR1
AMMECR1L
AMN1
AMOT
AMOTL1
AMOTL2
AMPD2
AMPD3
AMPH
AMT
AMZ1
AMZ2
ANAPC1
ANAPC10
ANAPC11
ANAPC13
ANAPC15
ANAPC16
ANAPC2
ANAPC4
ANAPC5
ANAPC7
ANGEL1
ANGEL2
ANGPT1
ANGPT2
ANGPT4
ANGPTL1
ANGPTL2
ANGPTL3
ANGPTL4
ANGPTL5
ANGPTL6
ANGPTL7
ANHX
ANK1
ANK2
ANK3
ANKDD1A
ANKDD1B
ANKEF1
ANKFY1
ANKH
ANKHD1
ANKHD1-EIF4EBP3
ANKIB1
ANKLE1
ANKLE2
ANKMY1
ANKMY2
ANKRD1
ANKRD10
ANKRD11
ANKRD12
ANKRD13A
ANKRD13B
ANKRD13C
ANKRD16
ANKRD17
ANKRD18A
ANKRD18B
ANKRD2
ANKRD20A1
ANKRD20A2
ANKRD20A3
ANKRD20A4
ANKRD22
ANKRD23
ANKRD26
ANKRD27
ANKRD28
ANKRD29
ANKRD30A
ANKRD30B
ANKRD31
ANKRD32
ANKRD33
ANKRD33B
ANKRD34A
ANKRD34B
ANKRD34C
ANKRD35
ANKRD36
ANKRD36B
ANKRD36C
ANKRD37
ANKRD39
ANKRD40
ANKRD42
ANKRD44
ANKRD45
ANKRD46
ANKRD49
ANKRD50
ANKRD52
ANKRD53
ANKRD54
ANKRD55
ANKRD6
ANKRD60
ANKRD61
ANKRD62
ANKRD65
ANKRD66
ANKRD7
ANKRD9
ANKS1A
ANKS1B
ANKS3
ANKS4B
ANKS6
ANKUB1
ANKZF1
ANLN
ANO1
ANO10
ANO2
ANO3
ANO4
ANO5
ANO6
ANO7
ANO9
ANP32A
ANP32B
ANP32E
ANPEP
ANTXR1
ANTXR2
ANTXRL
ANXA10
ANXA11
ANXA13
ANXA2
ANXA3
ANXA4
ANXA5
ANXA6
ANXA8
ANXA8L1
ANXA8L2
ANXA9
AOAH
AOC2
AOC3
AOX1
AP1AR
AP1B1
AP1G1
AP1G2
AP1M1
AP1M2
AP1S1
AP1S2
AP1S3
AP2A1
AP2A2
AP2B1
AP3B1
AP3B2
AP3D1
AP3M1
AP3M2
AP3S2
AP4B1
AP4E1
AP4M1
AP4S1
AP5B1
AP5M1
AP5S1
AP5Z1
APAF1
APBA1
APBA2
APBB1
APBB1IP
APBB2
APBB3
APC
APC2
APCDD1
APCDD1L
APCS
APEH
APEX2
APH1A
APH1B
API5
APIP
APITD1
APITD1-CORT
APLF
APLN
APLNR
APLP1
APLP2
APMAP
APOA1BP
APOA2
APOA4
APOA5
APOBEC1
APOBEC2
APOBEC3A
APOBEC3C
APOBEC3D
APOBEC3F
APOBEC3G
APOBEC3H
APOBEC4
APOBR
APOC2
APOC4
APOD
APOF
APOL1
APOL2
APOL3
APOL4
APOL5
APOL6
APOLD1
APOM
APOO
APOOL
APOPT1
APP
APPBP2
APPL1
APPL2
APRT
APTX
AQP1
AQP10
AQP11
AQP2
AQP3
AQP4
AQP5
AQP6
AQP7
AQP8
AQP9
AQPEP
AQR
AR
ARAF
ARAP1
ARAP2
ARAP3
ARC
ARCN1
AREG
AREGB
AREL1
ARF1
ARF3
ARF4
ARF5
ARF6
ARFGAP1
ARFGAP2
ARFGAP3
ARFGEF1
ARFGEF2
ARFIP1
ARFIP2
ARFRP1
ARG2
ARGFX
ARGLU1
ARHGAP1
ARHGAP10
ARHGAP11A
ARHGAP11B
ARHGAP12
ARHGAP15
ARHGAP17
ARHGAP18
ARHGAP19
ARHGAP20
ARHGAP21
ARHGAP22
ARHGAP23
ARHGAP24
ARHGAP25
ARHGAP26
ARHGAP27
ARHGAP28
ARHGAP29
ARHGAP30
ARHGAP31
ARHGAP32
ARHGAP33
ARHGAP35
ARHGAP36
ARHGAP39
ARHGAP4
ARHGAP40
ARHGAP42
ARHGAP44
ARHGAP5
ARHGAP6
ARHGAP8
ARHGAP9
ARHGDIA
ARHGEF1
ARHGEF10
ARHGEF10L
ARHGEF11
ARHGEF12
ARHGEF15
ARHGEF16
ARHGEF17
ARHGEF18
ARHGEF19
ARHGEF2
ARHGEF25
ARHGEF26
ARHGEF28
ARHGEF3
ARHGEF33
ARHGEF35
ARHGEF37
ARHGEF38
ARHGEF39
ARHGEF4
ARHGEF40
ARHGEF5
ARHGEF6
ARHGEF7
ARHGEF9
ARID1A
ARID1B
ARID2
ARID3A
ARID3B
ARID4A
ARID4B
ARID5A
ARID5B
ARIH1
ARIH2
ARIH2OS
ARL1
ARL10
ARL11
ARL13B
ARL14
ARL14EP
ARL15
ARL16
ARL17A
ARL17B
ARL2
ARL2BP
ARL3
ARL4A
ARL4C
ARL4D
ARL5A
ARL5B
ARL6
ARL6IP1
ARL6IP4
ARL6IP5
ARL6IP6
ARL8A
ARL8B
ARMC1
ARMC10
ARMC12
ARMC2
ARMC2-AS1
ARMC3
ARMC4
ARMC5
ARMC6
ARMC7
ARMC8
ARMC9
ARMCX1
ARMCX2
ARMCX3
ARMCX4
ARMCX5
ARMCX5-GPRASP2
ARMCX6
ARMS2
ARNT
ARNT2
ARNTL
ARNTL2
ARPC1A
ARPC1B
ARPC2
ARPC3
ARPC4
ARPC4-TTLL3
ARPC5
ARPC5L
ARPP19
ARPP21
ARRB1
ARRB2
ARRDC1
ARRDC2
ARRDC3
ARRDC4
ARRDC5
ARSA
ARSB
ARSD
ARSF
ARSG
ARSI
ARSJ
ARSK
ART1
ART3
ART4
ART5
ARTN
ARV1
ARVCF
ARX
AS3MT
ASAH1
ASAH2
ASAH2B
ASAP1
ASAP2
ASAP3
ASB1
ASB10
ASB11
ASB12
ASB13
ASB14
ASB15
ASB16
ASB2
ASB3
ASB4
ASB5
ASB6
ASB7
ASB8
ASB9
ASCC1
ASCC2
ASCC3
ASCL1
ASCL2
ASCL4
ASCL5
ASF1A
ASF1B
ASGR2
ASH1L
ASH2L
ASIC1
ASIC2
ASIC3
ASIC4
ASIP
ASL
ASMTL
ASNS
ASPA
ASPG
ASPH
ASPHD1
ASPHD2
ASPM
ASPN
ASPRV1
ASRGL1
ASTE1
ASTN1
ASTN2
ASXL1
ASXL2
ASXL3
ATAD1
ATAD2
ATAD2B
ATAD3A
ATAD3B
ATAD3C
ATAD5
ATAT1
ATCAY
ATE1
ATF1
ATF2
ATF3
ATF4
ATF5
ATF6
ATF6B
ATF7
ATF7IP
ATF7IP2
ATG10
ATG12
ATG13
ATG14
ATG16L1
ATG2A
ATG2B
ATG3
ATG4A
ATG4B
ATG4C
ATG4D
ATG5
ATG7
ATG9A
ATG9B
ATHL1
ATIC
ATL1
ATL2
ATL3
ATM
ATMIN
ATN1
ATOH7
ATOH8
ATOX1
ATP10A
ATP10B
ATP10D
ATP11A
ATP11B
ATP11C
ATP12A
ATP13A2
ATP13A3
ATP13A4
ATP1A1
ATP1A2
ATP1A4
ATP1B1
ATP1B2
ATP1B3
ATP1B4
ATP2A1
ATP2A2
ATP2A3
ATP2B1
ATP2B2
ATP2B3
ATP2B4
ATP2C1
ATP4A
ATP4B
ATP5D
ATP5E
ATP5F1
ATP5G1
ATP5G2
ATP5G3
ATP5H
ATP5J
ATP5J2
ATP5J2-PTCD1
ATP5L
ATP5L2
ATP5S
ATP5SL
ATP6AP1
ATP6AP2
ATP6V0A1
ATP6V0A2
ATP6V0A4
ATP6V0B
ATP6V0C
ATP6V0D1
ATP6V0D2
ATP6V0E1
ATP6V0E2
ATP6V1A
ATP6V1B1
ATP6V1B2
ATP6V1C1
ATP6V1C2
ATP6V1D
ATP6V1E1
ATP6V1G1
ATP6V1G2
ATP6V1G3
ATP6V1H
ATP7A
ATP7B
ATP8A1
ATP8A2
ATP8B1
ATP8B2
ATP8B3
ATP8B4
ATP9A
ATP9B
ATPAF1
ATPAF2
ATPIF1
ATR
ATRIP
ATRN
ATRNL1
ATRX
ATXN1
ATXN10
ATXN1L
ATXN2
ATXN2L
ATXN3
ATXN7
ATXN7L1
ATXN7L3
ATXN7L3B
AUH
AUNIP
AURKA
AURKB
AUTS2
AVEN
AVIL
AVL9
AVPI1
AVPR1A
AVPR1B
AVPR2
AWAT1
AWAT2
AXDND1
AXIN1
AXIN2
AXL
AZGP1
AZI1
AZI2
AZIN1
B2M
B3GALNT1
B3GALNT2
B3GALT1
B3GALT2
B3GALT4
B3GALT5
B3GALT6
B3GALTL
B3GAT1
B3GAT2
B3GAT3
B3GNT1
B3GNT2
B3GNT3
B3GNT4
B3GNT5
B3GNT6
B3GNT7
B3GNT9
B4GALNT1
B4GALNT2
B4GALNT3
B4GALNT4
B4GALT1
B4GALT2
B4GALT3
B4GALT4
B4GALT5
B4GALT6
B4GALT7
B9D1
B9D2
BAALC
BAAT
BABAM1
BACE1
BACE2
BACH1
BACH2
BAD
BAG1
BAG2
BAG3
BAG4
BAG5
BAGE
BAGE2
BAGE3
BAGE4
BAHCC1
BAHD1
BAI1
BAI2
BAI3
BAIAP2
BAIAP2L1
BAIAP2L2
BAIAP3
BAK1
BAMBI
BANK1
BANP
BAP1
BARD1
BARHL1
BARHL2
BARX1
BARX2
BASP1
BATF
BATF2
BATF3
BAX
BAZ1A
BAZ1B
BAZ2A
BAZ2B
BBC3
BBIP1
BBOX1
BBS1
BBS10
BBS12
BBS2
BBS4
BBS5
BBS7
BBS9
BBX
BCAM
BCAN
BCAP29
BCAP31
BCAR1
BCAR3
BCAS1
BCAS2
BCAS3
BCAS4
BCAT1
BCAT2
BCCIP
BCDIN3D
BCHE
BCKDHA
BCKDHB
BCKDK
BCL10
BCL11A
BCL11B
BCL2
BCL2A1
BCL2L1
BCL2L10
BCL2L11
BCL2L12
BCL2L13
BCL2L14
BCL2L15
BCL2L2
BCL2L2-PABPN1
BCL3
BCL6
BCL6B
BCL7A
BCL7B
BCL7C
BCL9
BCL9L
BCLAF1
BCMO1
BCO2
BCOR
BCORL1
BCR
BDH1
BDH2
BDKRB1
BDKRB2
BDNF
BDP1
BEAN1
BECN1
BEGAIN
BEND2
BEND3
BEND4
BEND6
BEND7
BEST1
BEST3
BEST4
BET1
BET1L
BEX1
BEX2
BEX4
BEX5
BFAR
BGLAP
BGN
BHLHA15
BHLHB9
BHLHE22
BHLHE40
BHLHE41
BHMT
BHMT2
BICC1
BICD1
BICD2
BID
BIK
BIN1
BIN2
BIN3
BIRC2
BIRC3
BIRC5
BIRC6
BIRC7
BIRC8
BIVM
BLCAP
BLK
BLMH
BLOC1S2
BLOC1S3
BLOC1S4
BLOC1S5
BLOC1S6
BLVRB
BLZF1
BMF
BMI1
BMP1
BMP10
BMP2
BMP2K
BMP3
BMP5
BMP6
BMP7
BMP8A
BMP8B
BMPER
BMPR1A
BMPR1B
BMPR2
BMS1
BMX
BNC1
BNC2
BNIP1
BNIP2
BNIP3
BNIP3L
BNIPL
BOC
BOD1
BOD1L1
BOD1L2
BOK
BOLA1
BOLA2
BOLL
BORA
BPGM
BPHL
BPI
BPIFA3
BPIFB1
BPIFB2
BPIFB3
BPIFB4
BPIFC
BPNT1
BPTF
BPY2
BPY2B
BPY2C
BRAF
BRAP
BRAT1
BRCA1
BRCA2
BRCC3
BRD1
BRD2
BRD3
BRD4
BRD7
BRD8
BRD9
BRE
BRF1
BRF2
BRI3
BRI3BP
BRINP1
BRINP2
BRINP3
BRIP1
BRK1
BRMS1
BRMS1L
BROX
BRPF1
BRPF3
BRS3
BRSK1
BRSK2
BRWD1
BRWD3
BSCL2
BSDC1
BSG
BSN
BSND
BSPRY
BST1
BST2
BTAF1
BTBD1
BTBD10
BTBD11
BTBD17
BTBD18
BTBD19
BTBD2
BTBD3
BTBD6
BTBD7
BTBD9
BTC
BTD
BTF3
BTF3L4
BTG1
BTG2
BTG3
BTG4
BTK
BTLA
BTN1A1
BTN2A1
BTN2A2
BTN3A1
BTN3A2
BTN3A3
BTNL3
BTNL8
BTNL9
BTRC
BUB1
BUB1B
BUB3
BUD13
BUD31
BVES
BYSL
BZRAP1
BZW1
BZW2
C10orf10
C10orf105
C10orf107
C10orf111
C10orf112
C10orf113
C10orf118
C10orf12
C10orf126
C10orf128
C10orf129
C10orf131
C10orf137
C10orf2
C10orf25
C10orf32
C10orf35
C10orf53
C10orf54
C10orf55
C10orf62
C10orf67
C10orf68
C10orf71
C10orf76
C10orf88
C10orf90
C10orf91
C10orf95
C10orf99
C11orf1
C11orf16
C11orf21
C11orf30
C11orf31
C11orf34
C11orf35
C11orf42
C11orf44
C11orf45
C11orf48
C11orf49
C11orf52
C11orf53
C11orf54
C11orf57
C11orf58
C11orf63
C11orf65
C11orf68
C11orf70
C11orf71
C11orf74
C11orf80
C11orf82
C11orf83
C11orf84
C11orf85
C11orf86
C11orf87
C11orf88
C11orf95
C11orf96
C12orf23
C12orf29
C12orf39
C12orf4
C12orf40
C12orf42
C12orf43
C12orf44
C12orf49
C12orf5
C12orf50
C12orf52
C12orf54
C12orf55
C12orf56
C12orf57
C12orf60
C12orf61
C12orf63
C12orf65
C12orf66
C12orf68
C12orf73
C12orf74
C12orf75
C12orf76
C12orf77
C12orf79
C12orf80
C13orf35
C13orf45
C14orf1
C14orf105
C14orf119
C14orf132
C14orf142
C14orf159
C14orf166
C14orf166B
C14orf169
C14orf177
C14orf178
C14orf180
C14orf182
C14orf2
C14orf28
C14orf37
C14orf39
C14orf79
C14orf93
C15orf26
C15orf27
C15orf32
C15orf38
C15orf38-AP3S2
C15orf39
C15orf40
C15orf41
C15orf43
C15orf48
C15orf52
C15orf53
C15orf54
C15orf56
C15orf57
C15orf59
C15orf60
C15orf61
C15orf62
C15orf65
C16orf11
C16orf13
C16orf45
C16orf46
C16orf47
C16orf52
C16orf54
C16orf58
C16orf59
C16orf62
C16orf70
C16orf71
C16orf72
C16orf74
C16orf80
C16orf82
C16orf87
C16orf89
C16orf90
C16orf91
C16orf92
C16orf93
C16orf95
C17orf100
C17orf102
C17orf103
C17orf104
C17orf105
C17orf107
C17orf112
C17orf49
C17orf50
C17orf51
C17orf53
C17orf58
C17orf59
C17orf62
C17orf64
C17orf67
C17orf70
C17orf72
C17orf74
C17orf75
C17orf77
C17orf78
C17orf80
C17orf82
C17orf85
C17orf89
C17orf96
C17orf97
C17orf99
C18orf21
C18orf25
C18orf32
C18orf42
C18orf54
C18orf56
C18orf63
C18orf8
C19orf10
C19orf12
C19orf18
C19orf24
C19orf25
C19orf26
C19orf35
C19orf38
C19orf40
C19orf43
C19orf44
C19orf47
C19orf48
C19orf52
C19orf53
C19orf54
C19orf55
C19orf59
C19orf60
C19orf66
C19orf67
C19orf68
C19orf69
C19orf71
C19orf73
C19orf77
C19orf80
C19orf81
C19orf82
C1GALT1
C1GALT1C1
C1orf101
C1orf106
C1orf109
C1orf110
C1orf115
C1orf116
C1orf122
C1orf123
C1orf127
C1orf131
C1orf141
C1orf146
C1orf158
C1orf159
C1orf162
C1orf168
C1orf173
C1orf174
C1orf177
C1orf185
C1orf186
C1orf198
C1orf204
C1orf21
C1orf210
C1orf216
C1orf222
C1orf226
C1orf229
C1orf233
C1orf27
C1orf35
C1orf43
C1orf50
C1orf51
C1orf52
C1orf53
C1orf56
C1orf61
C1orf63
C1orf64
C1orf65
C1orf68
C1orf74
C1orf85
C1orf86
C1orf95
C1QA
C1QB
C1QBP
C1QC
C1QL2
C1QL3
C1QL4
C1QTNF1
C1QTNF2
C1QTNF3
C1QTNF4
C1QTNF5
C1QTNF6
C1QTNF7
C1QTNF8
C1QTNF9
C1R
C1RL
C1S
C2
C20orf112
C20orf144
C20orf166
C20orf194
C20orf195
C20orf196
C20orf197
C20orf201
C20orf202
C20orf203
C20orf24
C20orf26
C20orf27
C20orf85
C20orf96
C21orf2
C21orf33
C21orf58
C21orf59
C21orf62
C21orf91
C22orf15
C22orf23
C22orf24
C22orf26
C22orf29
C22orf31
C22orf39
C22orf42
C22orf43
C22orf46
C2CD2
C2CD2L
C2CD3
C2CD4A
C2CD4B
C2CD4C
C2CD4D
C2CD5
C2orf15
C2orf27A
C2orf27B
C2orf40
C2orf42
C2orf43
C2orf44
C2orf47
C2orf48
C2orf49
C2orf50
C2orf53
C2orf54
C2orf57
C2orf61
C2orf62
C2orf66
C2orf68
C2orf69
C2orf71
C2orf72
C2orf73
C2orf74
C2orf76
C2orf78
C2orf80
C2orf83
C2orf88
C2orf91
C3AR1
C3orf14
C3orf17
C3orf18
C3orf20
C3orf22
C3orf27
C3orf30
C3orf33
C3orf35
C3orf38
C3orf43
C3orf52
C3orf55
C3orf56
C3orf58
C3orf62
C3orf67
C3orf70
C3orf72
C3orf79
C3orf80
C3orf83
C4A
C4B
C4BPB
C4orf17
C4orf19
C4orf21
C4orf22
C4orf26
C4orf27
C4orf29
C4orf3
C4orf32
C4orf33
C4orf36
C4orf40
C4orf45
C4orf46
C4orf50
C4orf51
C4orf6
C5
C5AR1
C5AR2
C5orf15
C5orf20
C5orf22
C5orf24
C5orf28
C5orf30
C5orf34
C5orf38
C5orf42
C5orf45
C5orf46
C5orf47
C5orf49
C5orf51
C5orf52
C5orf54
C5orf55
C5orf60
C5orf63
C5orf64
C6
C6orf1
C6orf10
C6orf106
C6orf118
C6orf120
C6orf132
C6orf141
C6orf15
C6orf163
C6orf165
C6orf195
C6orf201
C6orf203
C6orf211
C6orf222
C6orf223
C6orf226
C6orf25
C6orf47
C6orf48
C6orf57
C6orf62
C6orf7
C6orf89
C7
C7orf10
C7orf25
C7orf26
C7orf31
C7orf33
C7orf41
C7orf43
C7orf49
C7orf50
C7orf55
C7orf55-LUC7L2
C7orf57
C7orf60
C7orf63
C7orf65
C7orf69
C7orf71
C7orf73
C7orf76
C8A
C8G
C8orf22
C8orf31
C8orf33
C8orf34
C8orf37
C8orf4
C8orf44
C8orf44-SGK3
C8orf46
C8orf47
C8orf48
C8orf58
[truncated: 15,237 more rows]

## Sheet: enriched pathways
miRNA	PathName	PathFg	PathBg	GenomeFG	GenomeBG	pval	BH
hsa-miR-124-5p	Pathways in cancer	313	330	17236	19747	3.14825e-06	0.000610761
hsa-miR-124-5p	Wnt signaling pathway	147	152	17236	19747	5.33727e-05	0.0101942
hsa-miR-124-5p	Regulation of actin cytoskeleton	202	212	17236	19747	7.28076e-05	0.0138335
hsa-miR-124-5p	Axon guidance	125	129	17236	19747	0.000144553	0.0273205
hsa-miR-124-5p	Chemokine signaling pathway	180	189	17236	19747	0.000198939	0.0374005
hsa-miR-124-5p	Insulin signaling pathway	134	139	17236	19747	0.00020596	0.0387205
hsa-miR-124-5p	Chronic myeloid leukemia	74	75	17236	19747	0.000435967	0.0797819
hsa-miR-124-5p	Focal adhesion	192	203	17236	19747	0.000444298	0.0808623
hsa-miR-124-5p	p53 signaling pathway	67	68	17236	19747	0.00103636	0.184471
hsa-miR-124-5p	Fc gamma R mediated phagocytosis	94	97	17236	19747	0.00104163	0.185411
hsa-miR-124-5p	Ubiquitin mediated proteolysis	128	134	17236	19747	0.00115604	0.205776
hsa-miR-124-5p	Calcium signaling pathway	168	178	17236	19747	0.00139898	0.247619
hsa-miR-124-5p	Endocytosis	176	187	17236	19747	0.0016497	0.288698
hsa-miR-124-5p	Melanogenesis	98	102	17236	19747	0.00238353	0.400433
hsa-miR-124-5p	ErbB signaling pathway	86	89	17236	19747	0.00244204	0.407821
hsa-miR-124-5p	Prostate cancer	86	89	17236	19747	0.00244204	0.407821
hsa-miR-124-5p	Apoptosis	84	87	17236	19747	0.00301225	0.490997
hsa-miR-124-5p	MAPK signaling pathway	252	272	17236	19747	0.00307887	0.501856
hsa-miR-124-5p	Renal cell carcinoma	69	71	17236	19747	0.00405706	0.645073
hsa-miR-124-5p	Endometrial cancer	51	52	17236	19747	0.00722405	0.985404
hsa-miR-124-5p	Cytokine cytokine receptor interaction	245	266	17236	19747	0.00820965	1
hsa-miR-124-5p	Nitrogen metabolism	23	23	17236	19747	0.0437222	1
hsa-miR-124-5p	Gap junction	84	90	17236	19747	0.0501263	1
hsa-miR-124-5p	Long term potentiation	67	71	17236	19747	0.0431783	1
hsa-miR-124-5p	Complement and coagulation cascades	65	69	17236	19747	0.0511732	1
hsa-miR-124-5p	Glioma	63	65	17236	19747	0.00783718	1
hsa-miR-124-5p	Phosphatidylinositol signaling system	72	76	17236	19747	0.0279362	1
hsa-miR-124-5p	Hedgehog signaling pathway	54	56	17236	19747	0.0204805	1
hsa-miR-124-5p	Arrhythmogenic right ventricular cardiomyopathy ARVC	70	74	17236	19747	0.0333101	1
hsa-miR-124-5p	Jak STAT signaling pathway	144	156	17236	19747	0.0322287	1
hsa-miR-124-5p	Basal cell carcinoma	53	55	17236	19747	0.0227345	1
hsa-miR-124-5p	Cell cycle	116	124	17236	19747	0.0182725	1
hsa-miR-124-5p	Small cell lung cancer	79	84	17236	19747	0.0355303	1
hsa-miR-124-5p	Cell adhesion molecules CAMs	124	133	17236	19747	0.0201682	1
hsa-miR-124-5p	Melanoma	67	71	17236	19747	0.0431783	1
hsa-miR-124-5p	TGF beta signaling pathway	81	86	17236	19747	0.0301262	1
hsa-miR-124-5p	Peroxisome	74	79	17236	19747	0.0531224	1
hsa-miR-124-5p	T cell receptor signaling pathway	103	110	17236	19747	0.0239812	1
hsa-miR-124-5p	Pancreatic cancer	71	75	17236	19747	0.0305138	1
hsa-miR-124-5p	Dorso ventral axis formation	24	24	17236	19747	0.0381561	1
hsa-miR-124-5p	Acute myeloid leukemia	55	58	17236	19747	0.0522604	1
hsa-miR-124-5p	Colorectal cancer	82	86	17236	19747	0.0112287	1
hsa-miR-124-5p	B cell receptor signaling pathway	71	75	17236	19747	0.0305138	1
hsa-miR-124-5p	Fructose and mannose metabolism	34	35	17236	19747	0.0520953	1
hsa-miR-124-5p	Notch signaling pathway	46	47	17236	19747	0.0130682	1
hsa-miR-124-5p	Leukocyte transendothelial migration	109	116	17236	19747	0.0149831	1
hsa-miR-124-5p	Neurotrophin signaling pathway	121	129	17236	19747	0.0124495	1
hsa-miR-124-5p	Adherens junction	73	76	17236	19747	0.00930783	1
